# Supplementary material for: Aryl radical-induced desulfonylativeipso-substitution of diaryliodonium salts: an efficient route to sterically hindered biarylamines
Source: Royal Society of Chemistry journal article supplement (doi:10.1039/d0cc01766c), 2020-01-01

*Supporting Information for*

**Aryl Radicals Induced Desulfonylative *ipso*-Substitution of  
Diaryliodonium Salts: An Efficient Route to Steric Hindered  
Biarylamines**

Huangguan Chen<sup>a</sup>, Limin Wang<sup>a</sup>, and Jianwei Han<sup>a\*</sup>

<sup>a</sup>Key Laboratory for Advanced Materials and Feringa Nobel Prize Scientist Joint Research Center,  
Institute of Fine Chemicals, School of Chemistry & Molecular Engineering, East China University  
of Science and Technology, 130 Meilong Road, Shanghai 200237, P. R. China

**Email:** jianweihan@ecust.edu.cn

## Table of Contents

|                                                                                                 |    |
|-------------------------------------------------------------------------------------------------|----|
| Part 1. General Information .....                                                               | 3  |
| Part 2. Synthesis and Characterization of Diaryliodonium Salts .....                            | 4  |
| Part 3. Optimization of Desulfonylative <i>ipso</i> -Substitution Cascade reaction .....        | 23 |
| Part 4. Synthesis and Characterization of Products from Desulfonylative Cascade Reactions ..... | 24 |
| Part 5. Radical Trapping Experiments, EPR Experiments and Deuteration Experiment. ....          | 41 |
| Part 6. Derivatization of Products .....                                                        | 44 |
| Part 7. References .....                                                                        | 48 |
| Part 8. $^1\text{H}$ , $^{13}\text{C}$ , and $^{19}\text{F}$ NMR spectra of Products .....      | 49 |

## Part 1. General Information

### a. Methods:

**NMR spectrum:**  $^1\text{H}$ ,  $^{13}\text{C}$ , and  $^{19}\text{F}$  NMR spectra were recorded in  $\text{CDCl}_3$  or  $\text{DMSO-d}_6$  (with tetramethylsilane as an internal standard) on a Bruker AVANCE 400 spectrometer at ambient temperature, operating at 400 MHz, 100 MHz, and 376 MHz respectively. Data were reported as follows: Chemical shifts ( $\delta$ ) are reported in ppm, coupling constants (J) are in Hertz (Hz). The following abbreviations were used to explain the multiplicities: s = singlet, d = doublet, t = triplet, q = quartet, m = multiplet, br = broad.

**Mass spectroscopy:** Mass spectra were in general recorded on a Waters LCT Premier XE spectrometer or EI Mass spectra were measured on HP HP5989A, Agilent HP5873 or Waters Micromass GCT mass spectrometer. ESI-MS analyses were performed in positive ionization mode on an Agilent 1100-MSD or Bruker Daltonics FTMS-7 mass spectrometer.

**Chromatography:** Column chromatography was performed with silica gel (200-300 mesh ASTM).

### b. Materials:

All solvents were purchased from Adamas-beta and dried and/or distilled by standard methods. All reagents were purchased from commercial sources (Adamas-beta; Sinopharma reagents; TCI; Acros) and used without further purification. Reactions were monitored by TLC (detection with UV light). *ortho*-Iodo sulfonamides were synthesized following the literature procedures.<sup>1-3</sup> The preparation of all other materials is described in detail below.

## Part 2. Synthesis and Characterization of Diaryliodonium Salts

### General Procedure:

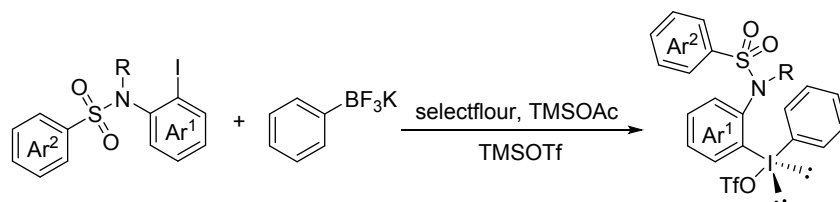

Following the modified procedure of literature.<sup>4</sup> Under an atmosphere of dry nitrogen, *ortho*-iodo sulfonamides (4.5 mmol), Selectfluor™ (2.07 g, 1.3 equiv.) and 15 mL of dry CH<sub>3</sub>CN were introduced to an oven-dried Schlenk flask. TMSOAc (1.8 mL, 2.6 equiv.) was added by syringe dropwise with stirring. The mixture was stirred at 50 °C for 24 h. The reaction mixture was cooled to room temperature and solid potassium aryltrifluoroborate (1.0 equiv.) was added directly to the flask against a flow of nitrogen. Once the added solid was dissolved, TMSOTf (1.0 equiv.) was added dropwise by syringe and the mixture was allowed to stir at room temperature for 12 hours. The solvents were removed under reduced pressure and 100 mL of acetate buffer (NaOAc: HOAc = 0.5 M: 0.5 M, pH = 5) was added. The mixture was extracted with CH<sub>2</sub>Cl<sub>2</sub> for 3 times. The combined organic extracts were dried with Na<sub>2</sub>SO<sub>4</sub>, filtered, and the solvent was removed by rotary evaporation. The residue was dissolved in CH<sub>2</sub>Cl<sub>2</sub> and a solution of potassium trifluoromethanesulfonate (4.0 equiv.) in H<sub>2</sub>O was added with stirring for 0.5 hour. The mixture was transferred to a separatory funnel and extracted with CH<sub>2</sub>Cl<sub>2</sub>. The combined organic extracts were dried with Na<sub>2</sub>SO<sub>4</sub>, filtered, and the solvent was removed by rotary evaporation. The residue was either triturated with diethyl ether or subjected to column chromatography directly on silica gel to afford pure diaryliodonium salts. The details for the specific scale, purification process of reactions, and characterization data of individual compounds are listed as following.

### Phenyl(2-((*N*,2,4,6-tetramethylphenyl)sulfonamido)phenyl)iodonium trifluoromethanesulfonate (**1a**)

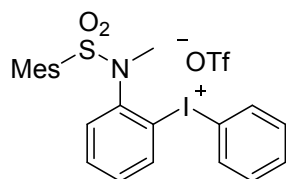

Prepared according to the **general procedure** on 4.5 mmol scale and a white powder (2.31 g, 80 %) was obtained through the procedure of trituration with diethyl ether.

M. p.: 167-169 °C.

<sup>1</sup>H NMR (400 MHz, DMSO) δ 8.24 (d, *J* = 7.5 Hz, 2H), 8.18 (dd, *J* = 7.9, 1.4 Hz, 1H), 7.72 (t, *J* = 7.4 Hz, 1H), 7.64 – 7.55 (m, 3H), 7.52 (td, *J* = 7.7, 1.6 Hz, 1H), 7.10 (s, 2H), 7.08 (dd, *J* = 8.0, 1.7 Hz, 1H), 3.04 (s, 3H), 2.29 (s, 3H), 2.18 (s, 6H).

<sup>13</sup>C NMR (101 MHz, DMSO) δ 143.46, 141.27, 139.73, 136.66, 135.81, 133.45, 132.52, 132.37, 131.82, 131.73, 129.77, 129.10, 121.26, 120.69 (q, *J*<sub>C-F</sub> = 323.7 Hz), 116.15, 39.10, 23.25, 20.46.

<sup>19</sup>F NMR (376 MHz, DMSO) δ -77.73.

HRMS *m/z* (ESI-TOF): calculated for C<sub>22</sub>H<sub>23</sub>NO<sub>2</sub>SI<sup>+</sup> [M-OTf]<sup>+</sup> 492.0494, found 492.0494.

**(4-Methoxyphenyl)(2-((*N*,2,4,6-tetramethylphenyl)sulfonamido)phenyl)iodonium trifluoromethanesulfonate (1b)**

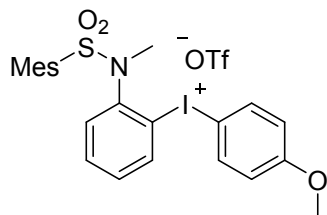

Prepared according to the **general procedure** on 4.5 mmol scale and a white powder (2.33 g, 77 %) was obtained through the procedure of trituration with diethyl ether.

M. p.: 172-173 °C.

<sup>1</sup>H NMR (400 MHz, DMSO) δ 8.19 (d, *J* = 9.0 Hz, 2H), 8.15 – 8.00 (m, 1H), 7.66 – 7.36 (m, 2H), 7.14 (d, *J* = 9.0 Hz, 2H), 7.11 (s, 2H), 7.09 – 7.04 (m, 1H), 3.83 (s, 3H), 3.11 (s, 3H), 2.29 (s, 3H), 2.17 (s, 6H).

<sup>13</sup>C NMR (101 MHz, DMSO) δ 162.29, 143.54, 141.03, 139.79, 138.06, 136.08, 133.26, 132.59, 131.75, 129.72, 128.98, 121.52, 120.71 (q, *J*<sub>C-F</sub> = 323.5 Hz), 117.61, 104.72, 55.82, 39.31, 23.34, 20.52.

<sup>19</sup>F NMR (376 MHz, DMSO) δ -77.77.

HRMS *m/z* (ESI-TOF): calculated for C<sub>23</sub>H<sub>25</sub>NO<sub>3</sub>Si<sup>+</sup> [M-OTf]<sup>+</sup> 522.0600, found 522.0608.

**(2-((*N*,2,4,6-Tetramethylphenyl)sulfonamido)phenyl)(2,4,6-trimethoxyphenyl)iodonium trifluoromethanesulfonate (1c)**

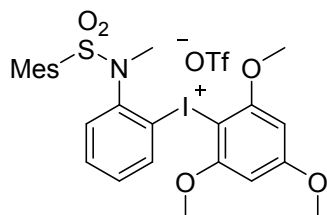

Prepared according to the **general procedure** on 4.5 mmol scale and a white powder (2.63 g, 80 %) was obtained through the procedure of trituration with diethyl ether.

M. p.: 180-182 °C.

<sup>1</sup>H NMR (400 MHz, DMSO) δ 7.83 (dd, *J* = 8.0, 1.0 Hz, 1H), 7.53 (td, *J* = 7.7, 1.4 Hz, 1H), 7.45 (td, *J* = 7.8, 1.4 Hz, 1H), 7.10 (m, 3H), 6.51 (s, 2H), 3.93 (s, 6H), 3.89 (s, 3H), 3.17 (s, 3H), 2.29 (s, 3H), 2.18 (s, 6H).

<sup>13</sup>C NMR (101 MHz, DMSO) δ 166.70, 159.40, 143.57, 140.68, 139.77, 135.31, 133.07, 132.53, 131.86, 129.68, 128.76, 120.71 (q, *J*<sub>C-F</sub> = 323.5 Hz), 120.67, 92.21, 86.23, 57.40, 56.30, 39.04, 23.20, 20.49.

<sup>19</sup>F NMR (376 MHz, DMSO) δ -77.76.

HRMS *m/z* (ESI-TOF): calculated for C<sub>25</sub>H<sub>29</sub>NO<sub>5</sub>Si<sup>+</sup> [M-OTf]<sup>+</sup> 582.0811, found 582.0809.

**Mesityl(2-((*N*,2,4,6-tetramethylphenyl)sulfonamido)phenyl)iodonium trifluoromethanesulfonate (1d)**

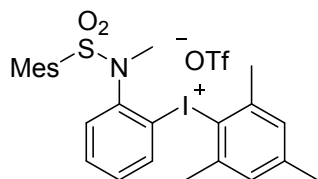

Prepared according to the **general procedure** on 4.5 mmol scale and a white powder (1.84 g, 60 %) was obtained through the procedure of trituration with diethyl ether.

M. p.: 182-184 °C.

$^1\text{H}$  NMR (400 MHz, DMSO)  $\delta$  7.75 (d,  $J$  = 7.9 Hz, 1H), 7.56 (t,  $J$  = 7.4 Hz, 1H), 7.48 (t,  $J$  = 7.6 Hz, 1H), 7.28 (s, 2H), 7.10 (m, 3H), 3.03 (s, 3H), 2.54 (s, 6H), 2.33 (s, 3H), 2.29 (s, 3H), 2.15 (s, 6H).

$^{13}\text{C}$  NMR (101 MHz, DMSO)  $\delta$  143.77, 143.67, 141.94, 140.94, 139.99, 135.13, 133.19, 132.61, 132.07, 130.08, 129.19, 129.02, 121.97, 120.69 (q,  $J_{\text{C-F}}$  = 323.5 Hz), 118.71, 38.90, 26.14, 23.25, 20.55, 20.50.

$^{19}\text{F}$  NMR (376 MHz, DMSO)  $\delta$  -77.76.

HRMS  $m/z$  (ESI-TOF): calculated for  $\text{C}_{25}\text{H}_{29}\text{NO}_2\text{Si}^+$  [M-OTf] $^+$  534.0964, found 534.0968.

**(4-Nitrophenyl)(2-((N,2,4,6-tetramethylphenyl)sulfonamido)phenyl)iodonium trifluoromethanesulfonate (1e)**

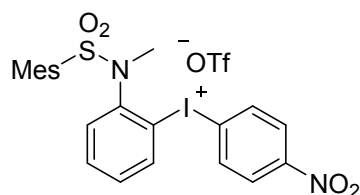

Prepared according to the **general procedure** on 4.5 mmol scale and a light yellow powder (1.67 g, 54 %) was obtained through the procedure of trituration with diethyl ether.

M. p.: 187-189 °C.

$^1\text{H}$  NMR (400 MHz, DMSO)  $\delta$  8.45 – 8.29 (m, 5H), 7.68 – 7.51 (m, 2H), 7.13 – 7.04 (m, 3H), 2.93 (s, 3H), 2.28 (s, 3H), 2.17 (s, 6H).

$^{13}\text{C}$  NMR (101 MHz, DMSO)  $\delta$  149.39, 143.45, 141.68, 139.75, 137.68, 136.78, 133.89, 132.57, 131.79, 129.81, 129.26, 126.14, 122.77, 122.46, 120.70 (q,  $J_{\text{C-F}}$  = 323.5 Hz), 39.10, 23.38, 20.49.

$^{19}\text{F}$  NMR (376 MHz, DMSO)  $\delta$  -77.77.

HRMS  $m/z$  (ESI-TOF): calculated for  $\text{C}_{22}\text{H}_{22}\text{N}_2\text{O}_4\text{Si}^+$  [M-OTf] $^+$  537.0345, found 537.0337.

**(5-Methyl-2-((N,2,4,6-tetramethylphenyl)sulfonamido)phenyl)(phenyl)iodonium trifluoromethanesulfonate (1ab)**

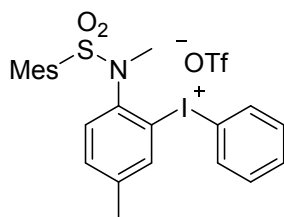

Prepared according to the **general procedure** on 4.5 mmol scale and a white powder (2.15 g, 73 %) was obtained through the procedure of trituration with diethyl ether.

M. p.: 171-173 °C.

$^1\text{H}$  NMR (400 MHz, DMSO)  $\delta$  8.21 (d,  $J$  = 7.5 Hz, 2H), 8.06 (d,  $J$  = 1.2 Hz, 1H), 7.71 (t,  $J$  = 7.4 Hz, 1H), 7.58 (dd,  $J$  = 10.7, 4.8 Hz, 2H), 7.40 (dd,  $J$  = 8.1, 1.2 Hz, 1H), 7.10 (s, 2H), 6.94 (d,  $J$  = 8.1 Hz, 1H), 2.97 (s, 3H), 2.33 (s, 3H), 2.29 (s, 3H), 2.19 (s, 6H).

$^{13}\text{C}$  NMR (101 MHz, DMSO)  $\delta$  143.35, 142.06, 139.69, 138.79, 136.89, 135.73, 134.00, 132.50, 132.28, 131.79, 129.99, 128.59, 121.04, 120.68 (q,  $J_{\text{C-F}} = 323.7$  Hz), 116.06, 39.17, 23.34, 20.48, 20.33.

$^{19}\text{F}$  NMR (376 MHz, DMSO)  $\delta$  -77.76.

HRMS  $m/z$  (ESI-TOF): calculated for  $\text{C}_{23}\text{H}_{25}\text{NO}_2\text{Si}^+ [\text{M-OTf}]^+$  506.0651, found 506.0636.

**(4-Methyl-2-((N,2,4,6-tetramethylphenyl)sulfonamido)phenyl)(phenyl)iodonium trifluoromethanesulfonate (1ac)**

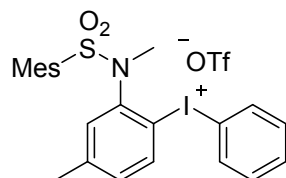

Prepared according to the **general procedure** on 4.5 mmol scale and a white powder (2.09 g, 71 %) was obtained through the procedure of trituration with diethyl ether.

M. p.: 169-171 °C.

$^1\text{H}$  NMR (400 MHz, DMSO)  $\delta$  8.19 (d,  $J = 8.0$  Hz, 2H), 8.08 (d,  $J = 8.3$  Hz, 1H), 7.70 (t,  $J = 7.4$  Hz, 1H), 7.57 (dd,  $J = 10.8, 4.7$  Hz, 2H), 7.34 (dd,  $J = 8.3, 1.3$  Hz, 1H), 7.11 (s, 2H), 6.80 (d,  $J = 1.4$  Hz, 1H), 2.97 (s, 3H), 2.30 (s, 3H), 2.18 (s, 6H), 2.18 (s, 3H).

$^{13}\text{C}$  NMR (101 MHz, DMSO)  $\delta$  144.23, 143.44, 141.25, 139.79, 136.54, 135.64, 132.42, 132.23, 131.75, 129.72, 129.69, 120.69 (q,  $J_{\text{C-F}} = 323.6$  Hz), 117.58, 116.25, 39.20, 23.25, 20.47, 20.43.

$^{19}\text{F}$  NMR (376 MHz, DMSO)  $\delta$  -77.75.

HRMS  $m/z$  (ESI-TOF): calculated for  $\text{C}_{23}\text{H}_{25}\text{NO}_2\text{Si}^+ [\text{M-OTf}]^+$  506.0651, found 506.0659.

**(5-Methoxy-2-((N,2,4,6-tetramethylphenyl)sulfonamido)phenyl)(phenyl)iodonium trifluoromethanesulfonate (1ad)**

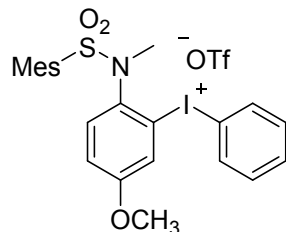

Prepared according to the **general procedure** on 4.5 mmol scale and a white powder (2.48 g, 82 %) was obtained through the procedure of trituration with diethyl ether.

M. p.: 182-183 °C.

$^1\text{H}$  NMR (400 MHz, DMSO)  $\delta$  8.24 (d,  $J = 8.3$  Hz, 2H), 7.79 (d,  $J = 2.8$  Hz, 1H), 7.72 (t,  $J = 7.4$  Hz, 1H), 7.58 (dd,  $J = 10.8, 4.7$  Hz, 2H), 7.14 (dd,  $J = 8.9, 2.8$  Hz, 1H), 7.09 (s, 2H), 6.97 (d,  $J = 8.9$  Hz, 1H), 3.78 (s, 3H), 2.96 (s, 3H), 2.28 (s, 3H), 2.21 (s, 6H).

$^{13}\text{C}$  NMR (101 MHz, DMSO)  $\delta$  160.07, 143.30, 139.67, 135.75, 133.69, 132.50, 132.35, 131.80, 130.11, 129.48, 122.21, 121.65, 120.70 (q,  $J_{\text{C-F}} = 323.6$  Hz), 118.32, 116.22, 56.35, 39.31, 23.34, 20.49.

$^{19}\text{F}$  NMR (376 MHz, DMSO)  $\delta$  -77.75.

HRMS  $m/z$  (ESI-TOF): calculated for  $\text{C}_{23}\text{H}_{25}\text{NO}_3\text{Si}^+ [\text{M-OTf}]^+$  522.0600, found 522.0593.

**Phenyl(4-((*N*,2,4,6-tetramethylphenyl)sulfonamido)-[1,1'-biphenyl]-3-yl)iodonium trifluoromethanesulfonate (1ae)**

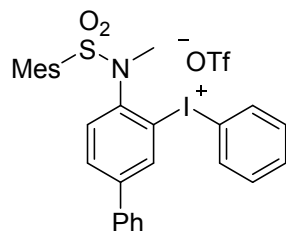

Prepared according to the **general procedure** on 4.5 mmol scale and a white powder (1.77 g, 55 %) was obtained through the procedure of trituration with diethyl ether.

M. p.: 128-130 °C.

<sup>1</sup>H NMR (400 MHz, DMSO) δ 8.58 (d, *J* = 2.1 Hz, 1H), 8.28 (dd, *J* = 8.3, 1.0 Hz, 2H), 7.91 (dd, *J* = 8.4, 2.1 Hz, 1H), 7.76 – 7.65 (m, 3H), 7.58 (dd, *J* = 10.7, 4.8 Hz, 2H), 7.55 – 7.49 (m, 2H), 7.49 – 7.42 (m, 1H), 7.14 (d, *J* = 8.4 Hz, 1H), 7.11 (s, 2H), 2.99 (s, 3H), 2.29 (s, 3H), 2.23 (s, 6H).

<sup>13</sup>C NMR (101 MHz, DMSO) δ 143.47, 142.83, 140.43, 139.78, 136.73, 135.77, 134.75, 132.59, 132.30, 131.80, 131.22, 129.92, 129.33, 129.16, 129.00, 126.95, 122.33, 120.72 (q, *J*<sub>C-F</sub> = 326.0 Hz), 116.56, 39.05, 23.37, 20.53.

<sup>19</sup>F NMR (376 MHz, DMSO) δ -77.74.

HRMS *m/z* (ESI-TOF): calculated for C<sub>28</sub>H<sub>27</sub>NO<sub>2</sub>SI<sup>+</sup> [M-OTf]<sup>+</sup> 568.0807, found 568.0803.

**(5-Fluoro-2-((*N*,2,4,6-tetramethylphenyl)sulfonamido)phenyl)(phenyl)iodonium trifluoromethanesulfonate (1af)**

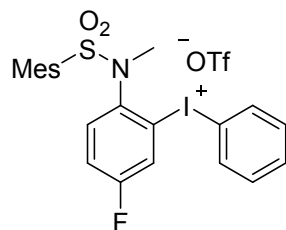

Prepared according to the **general procedure** on 4.5 mmol scale and a white powder (2.01 g, 68 %) was obtained through the procedure of trituration with diethyl ether.

M. p.: 190-192 °C.

<sup>1</sup>H NMR (400 MHz, DMSO) δ 8.29 – 8.16 (m, 3H), 7.72 (t, *J* = 7.4 Hz, 1H), 7.59 (dd, *J* = 10.8, 4.7 Hz, 2H), 7.56 – 7.46 (m, 1H), 7.14 (dd, *J* = 9.0, 5.1 Hz, 1H), 7.11 (s, 2H), 2.95 (s, 3H), 2.29 (s, 3H), 2.20 (s, 6H).

<sup>13</sup>C NMR (101 MHz, DMSO) δ 161.22 (d, *J*<sub>C-F</sub> = 255.4 Hz), 143.52, 139.73, 138.08 (d, *J*<sub>C-F</sub> = 3.4 Hz), 135.79, 132.60, 132.45, 131.88, 130.42 (d, *J*<sub>C-F</sub> = 9.1 Hz), 129.72, 124.00 (d, *J*<sub>C-F</sub> = 26.1 Hz), 122.10 (d, *J*<sub>C-F</sub> = 8.1 Hz), 120.70 (q, *J*<sub>C-F</sub> = 323.6 Hz), 120.52 (d, *J*<sub>C-F</sub> = 22.5 Hz), 116.68, 39.18, 23.33, 20.51.

<sup>19</sup>F NMR (376 MHz, DMSO) δ -77.76, -107.88.

HRMS *m/z* (ESI-TOF): calculated for C<sub>22</sub>H<sub>22</sub>NO<sub>2</sub>FSI<sup>+</sup> [M-OTf]<sup>+</sup> 510.0400, found 510.0391.

**(5-Chloro-2-((*N*,2,4,6-tetramethylphenyl)sulfonamido)phenyl)(phenyl)iodonium trifluoromethanesulfonate (1ag)**

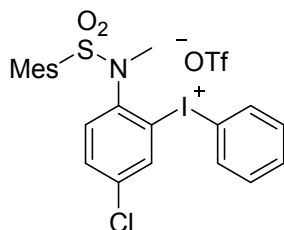

Prepared according to the **general procedure** on 4.5 mmol scale and a white powder (2.04 g, 67 %) was obtained through the procedure of trituration with diethyl ether.

M. p.: 206-207 °C.

$^1\text{H}$  NMR (400 MHz, DMSO)  $\delta$  8.39 (d,  $J$  = 2.4 Hz, 1H), 8.25 (d,  $J$  = 7.5 Hz, 2H), 7.71 (dt,  $J$  = 8.5, 4.9 Hz, 2H), 7.60 (t,  $J$  = 7.8 Hz, 2H), 7.11 (s, 2H), 7.10 (d,  $J$  = 8.7 Hz, 1H), 2.92 (s, 3H), 2.29 (s, 3H), 2.21 (s, 6H).

$^{13}\text{C}$  NMR (101 MHz, DMSO)  $\delta$  143.56, 140.55, 139.71, 136.24, 135.79, 134.84, 133.38, 132.61, 132.43, 131.85, 130.11, 129.65, 122.58, 120.69 (q,  $J_{\text{C-F}}$  = 323.5 Hz), 116.75, 38.97, 23.35, 20.50.

$^{19}\text{F}$  NMR (376 MHz, DMSO)  $\delta$  -77.75.

HRMS  $m/z$  (ESI-TOF): calculated for  $\text{C}_{22}\text{H}_{22}\text{NO}_2\text{SClI}^+ [\text{M-OTf}]^+$  526.0105, found 526.0103.

**(5-Bromo-2-((N,2,4,6-tetramethylphenyl)sulfonamido)phenyl)(phenyl)iodonium trifluoromethanesulfonate (1ah)**

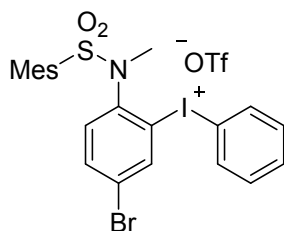

Prepared according to the **general procedure** on 4.5 mmol scale and a white powder (2.20 g, 68 %) was obtained through the procedure of trituration with diethyl ether.

M. p.: 208-209 °C.

$^1\text{H}$  NMR (400 MHz, DMSO)  $\delta$  8.49 (d,  $J$  = 2.2 Hz, 1H), 8.25 (d,  $J$  = 7.5 Hz, 2H), 7.81 (dd,  $J$  = 8.5, 2.2 Hz, 1H), 7.72 (t,  $J$  = 7.4 Hz, 1H), 7.60 (t,  $J$  = 7.8 Hz, 2H), 7.12 (s, 2H), 7.02 (d,  $J$  = 8.6 Hz, 1H), 2.92 (s, 3H), 2.29 (s, 3H), 2.21 (s, 6H).

$^{13}\text{C}$  NMR (101 MHz, DMSO)  $\delta$  143.56, 140.90, 139.71, 138.92, 136.31, 135.79, 132.62, 132.42, 131.84, 130.47, 129.65, 123.22, 122.93, 120.69 (q,  $J_{\text{C-F}}$  = 323.7 Hz), 116.76, 38.90, 23.35, 20.50.

$^{19}\text{F}$  NMR (376 MHz, DMSO)  $\delta$  -77.74.

HRMS  $m/z$  (ESI-TOF): calculated for  $\text{C}_{22}\text{H}_{22}\text{NO}_2\text{SBrI}^+ [\text{M-OTf}]^+$  569.9599, found 569.9592.

**(4-Chloro-2-((N,2,4,6-tetramethylphenyl)sulfonamido)phenyl)(phenyl)iodonium trifluoromethanesulfonate (1ai)**

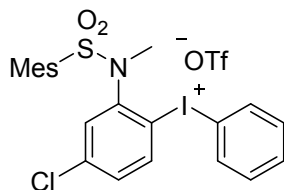

Prepared according to the **general procedure** on 4.5 mmol scale and a white powder (2.07 g, 68 %) was obtained through the procedure of trituration with diethyl ether.

M. p.: 197-198 °C.

$^1\text{H}$  NMR (400 MHz, DMSO)  $\delta$  8.23 (dd,  $J$  = 4.9, 3.9 Hz, 3H), 7.72 (t,  $J$  = 7.4 Hz, 1H), 7.67 (dd,  $J$  = 8.7, 2.4 Hz, 1H), 7.59 (t,  $J$  = 7.8 Hz, 2H), 7.17 (d,  $J$  = 2.4 Hz, 1H), 7.14 (s, 2H), 2.97 (s, 3H), 2.30 (s, 3H), 2.20 (s, 6H).

$^{13}\text{C}$  NMR (101 MHz, DMSO)  $\delta$  143.69, 142.83, 139.85, 138.05, 137.98, 135.77, 132.58, 132.42, 131.87, 131.55, 129.40, 129.37, 120.70 (q,  $J_{\text{C-F}}$  = 323.5 Hz), 119.80, 116.52, 38.90, 23.26, 20.50.

$^{19}\text{F}$  NMR (376 MHz, DMSO)  $\delta$  -77.75.

HRMS  $m/z$  (ESI-TOF): calculated for  $\text{C}_{22}\text{H}_{22}\text{NO}_2\text{SClI}^+ [\text{M-OTf}]^+$  526.0105, found 526.0103.

**(4-Bromo-2-((*N*,2,4,6-tetramethylphenyl)sulfonamido)phenyl)(phenyl)iodonium trifluoromethanesulfonate (1aj)**

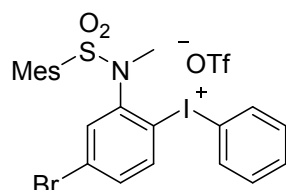

Prepared according to the **general procedure** on 4.5 mmol scale and a white powder (2.17 g, 67 %) was obtained through the procedure of trituration with diethyl ether.

M. p.: 206-208 °C.

$^1\text{H}$  NMR (400 MHz, DMSO)  $\delta$  8.26 – 8.17 (m, 2H), 8.13 (d,  $J$  = 8.6 Hz, 1H), 7.78 (dd,  $J$  = 8.6, 2.2 Hz, 1H), 7.72 (t,  $J$  = 7.4 Hz, 1H), 7.58 (t,  $J$  = 7.8 Hz, 2H), 7.22 (d,  $J$  = 2.2 Hz, 1H), 7.14 (s, 2H), 2.97 (s, 3H), 2.30 (s, 3H), 2.20 (s, 6H).

$^{13}\text{C}$  NMR (101 MHz, DMSO)  $\delta$  143.67, 142.72, 139.85, 138.10, 135.78, 134.45, 132.57, 132.41, 132.20, 131.86, 129.34, 126.48, 120.70 (q,  $J_{\text{C-F}}$  = 323.4 Hz), 120.51, 116.49, 38.96, 23.26, 20.51.

$^{19}\text{F}$  NMR (376 MHz, DMSO)  $\delta$  -77.74.

HRMS  $m/z$  (ESI-TOF): calculated for  $\text{C}_{22}\text{H}_{22}\text{NO}_2\text{SBrI}^+ [\text{M-OTf}]^+$  569.9599, found 569.9587.

**(5-Nitro-2-((*N*,2,4,6-tetramethylphenyl)sulfonamido)phenyl)(phenyl)iodonium trifluoromethanesulfonate (1ak)**

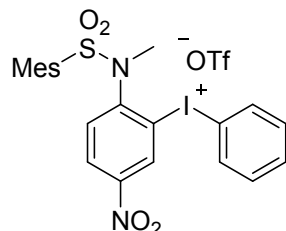

Prepared according to the **general procedure** on 4.5 mmol scale and a light yellow powder (1.64 g, 53 %) was obtained through the procedure of trituration with diethyl ether.

M. p.: 206-208 °C.

$^1\text{H}$  NMR (400 MHz, DMSO)  $\delta$  9.08 (d,  $J$  = 2.5 Hz, 1H), 8.40 (dd,  $J$  = 8.8, 2.5 Hz, 1H), 8.27 (d,  $J$  = 7.7 Hz, 2H), 7.72 (t,  $J$  = 7.4 Hz, 1H), 7.60 (t,  $J$  = 7.8 Hz, 2H), 7.39 (d,  $J$  = 8.8 Hz, 1H), 7.14 (s, 2H), 2.89 (s, 3H), 2.30 (s, 3H), 2.22 (s, 6H).

$^{13}\text{C}$  NMR (101 MHz, DMSO)  $\delta$  147.27, 147.20, 143.86, 139.82, 135.81, 132.76, 132.48, 132.08, 131.88, 129.57, 129.38, 128.17, 122.36, 120.69 (q,  $J_{\text{C-F}} = 323.5$  Hz), 117.15, 38.63, 23.45, 20.53.

$^{19}\text{F}$  NMR (376 MHz, DMSO)  $\delta$  -77.76.

HRMS  $m/z$  (ESI-TOF): calculated for  $\text{C}_{22}\text{H}_{22}\text{N}_2\text{O}_4\text{SI}^+$  [M-OTf] $^+$  537.0345, found 537.0331.

**Phenyl(2-((*N*,2,4,6-tetramethylphenyl)sulfonamido)-5-(trifluoromethyl)phenyl)iodonium trifluoromethanesulfonate (1al)**

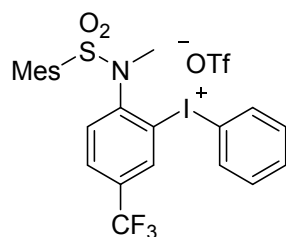

Prepared according to the **general procedure** on 4.5 mmol scale and a white powder (2.04 g, 64 %) was obtained through the procedure of trituration with diethyl ether.

M. p.: 191-193 °C.

$^1\text{H}$  NMR (400 MHz, DMSO)  $\delta$  8.70 (d,  $J = 1.5$  Hz, 1H), 8.26 (d,  $J = 8.2$  Hz, 2H), 8.03 (dd,  $J = 8.4, 1.6$  Hz, 1H), 7.72 (t,  $J = 7.4$  Hz, 1H), 7.60 (t,  $J = 7.8$  Hz, 2H), 7.33 (d,  $J = 8.4$  Hz, 1H), 7.14 (s, 2H), 2.91 (s, 3H), 2.30 (s, 3H), 2.20 (s, 6H).

$^{13}\text{C}$  NMR (101 MHz, DMSO)  $\delta$  145.53, 143.77, 139.76, 135.81, 134.20 (q,  $J_{\text{C-F}} = 3.7$  Hz), 132.73, 132.51, 131.89, 130.57, 129.82, 129.45, 122.58 (q,  $J_{\text{C-F}} = 274.4$  Hz), 122.32, 120.70 (q,  $J_{\text{C-F}} = 323.7$  Hz), 116.72, 38.69, 23.33, 20.51.

$^{19}\text{F}$  NMR (376 MHz, DMSO)  $\delta$  -61.14, -77.78.

HRMS  $m/z$  (ESI-TOF): calculated for  $\text{C}_{23}\text{H}_{22}\text{NO}_2\text{SF}_3\text{I}^+$  [M-OTf] $^+$  560.0368, found 560.0367.

**(5-Cyano-2-((*N*,2,4,6-tetramethylphenyl)sulfonamido)phenyl)(phenyl)iodonium trifluoromethanesulfonate (1am)**

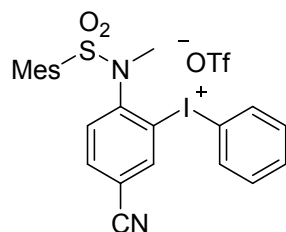

Prepared according to the **general procedure** on 4.5 mmol scale and a white powder (1.89 g, 63 %) was obtained through the procedure of trituration with diethyl ether.

M. p.: 208-209 °C.

$^1\text{H}$  NMR (400 MHz, DMSO)  $\delta$  8.83 (d,  $J = 1.8$  Hz, 1H), 8.23 (d,  $J = 7.5$  Hz, 2H), 8.12 (dd,  $J = 8.3, 1.9$  Hz, 1H), 7.72 (t,  $J = 7.4$  Hz, 1H), 7.59 (dd,  $J = 10.8, 4.8$  Hz, 2H), 7.33 (d,  $J = 8.3$  Hz, 1H), 7.12 (s, 2H), 2.91 (s, 3H), 2.29 (s, 3H), 2.19 (s, 6H).

$^{13}\text{C}$  NMR (101 MHz, DMSO)  $\delta$  145.87, 143.79, 140.79, 139.79, 137.30, 135.80, 132.72, 132.48, 131.90, 129.67, 129.42, 122.36, 120.70 (q,  $J_{\text{C-F}} = 323.6$  Hz), 116.92, 116.41, 113.44, 38.62, 23.38, 20.53.

$^{19}\text{F}$  NMR (376 MHz, DMSO)  $\delta$  -77.76.

HRMS m/z (ESI-TOF): calculated for  $C_{23}H_{22}N_2O_2Si^+ [M-OTf]^+$  517.0447, found 517.0442.

**(5-(Methoxycarbonyl)-2-((*N*,2,4,6-tetramethylphenyl)sulfonamido)phenyl)(phenyl)iodonium trifluoromethanesulfonate (1an)**

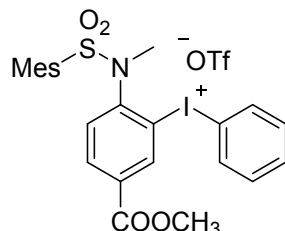

Prepared according to the **general procedure** on 4.5 mmol scale and a white powder (2.17 g, 69 %) was obtained through the procedure of trituration with diethyl ether.

M. p.: 194-196 °C.

$^1H$  NMR (400 MHz, DMSO)  $\delta$  8.74 (d,  $J$  = 1.9 Hz, 1H), 8.25 (d,  $J$  = 7.5 Hz, 2H), 8.08 (dd,  $J$  = 8.3, 1.9 Hz, 1H), 7.72 (t,  $J$  = 7.4 Hz, 1H), 7.60 (t,  $J$  = 7.8 Hz, 2H), 7.23 (d,  $J$  = 8.3 Hz, 1H), 7.12 (s, 2H), 3.88 (s, 3H), 2.91 (s, 3H), 2.29 (s, 3H), 2.19 (s, 6H).

$^{13}C$  NMR (101 MHz, DMSO)  $\delta$  163.91, 145.60, 143.74, 139.78, 137.51, 135.87, 133.76, 132.69, 132.46, 131.88, 131.67, 129.42, 129.15, 121.83, 120.70 (q,  $J_{C-F}$  = 323.5 Hz), 116.51, 52.99, 38.71, 23.40, 20.53.

$^{19}F$  NMR (376 MHz, DMSO)  $\delta$  -77.77.

HRMS m/z (ESI-TOF): calculated for  $C_{24}H_{25}NO_4Si^+ [M-OTf]^+$  550.0549, found 550.0544.

**(2-((*N*-Ethyl-2,4,6-trimethylphenyl)sulfonamido)phenyl)(phenyl)iodonium trifluoromethanesulfonate (1ba)**

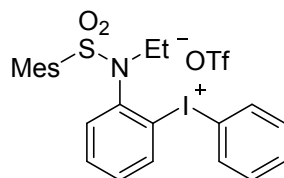

Prepared according to the **general procedure** on 4.5 mmol scale and a white powder (1.77 g, 60 %) was obtained through the procedure of trituration with diethyl ether.

M. p.: 168-170 °C.

$^1H$  NMR (400 MHz, DMSO)  $\delta$  8.26 (d,  $J$  = 7.5 Hz, 2H), 8.06 (dd,  $J$  = 8.0, 1.4 Hz, 1H), 7.77 (t,  $J$  = 7.4 Hz, 1H), 7.65 – 7.56 (m, 3H), 7.53 (td,  $J$  = 7.8, 1.5 Hz, 1H), 7.19 (dd,  $J$  = 7.9, 1.5 Hz, 1H), 7.08 (s, 2H), 4.06 (m, 1H), 3.59 (m, 1H), 2.28 (s, 3H), 2.16 (s, 6H), 0.92 (t,  $J$  = 7.1 Hz, 3H).

$^{13}C$  NMR (101 MHz, DMSO)  $\delta$  143.57, 139.60, 138.09, 135.95, 135.84, 133.33, 132.80, 132.53, 132.23, 132.07, 130.29, 130.18, 122.42, 120.69 (q,  $J_{C-F}$  = 323.6 Hz), 116.15, 45.91, 23.10, 20.46, 12.98.

$^{19}F$  NMR (376 MHz, DMSO)  $\delta$  -77.74.

HRMS m/z (ESI-TOF): calculated for  $C_{23}H_{25}NO_2Si^+ [M-OTf]^+$  506.0651, found 506.0642.

**Phenyl(2-((2,4,6-trimethyl-*N*-octylphenyl)sulfonamido)phenyl)iodonium trifluoromethanesulfonate (1ca)**

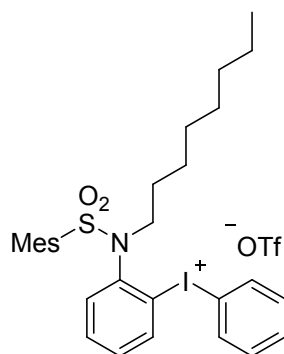

Prepared according to the **general procedure** on 4.5 mmol scale and a white powder (1.83 g, 55 %) was obtained through the procedure of column chromatography.

M. p.: 45-47 °C.

$^1\text{H}$  NMR (400 MHz,  $\text{CDCl}_3$ )  $\delta$  8.04 – 7.91 (m, 2H), 7.68 (t,  $J$  = 7.5 Hz, 1H), 7.57 (dd,  $J$  = 8.2, 1.2 Hz, 1H), 7.51 (m, 3H), 7.42 – 7.35 (m, 1H), 7.06 (dd,  $J$  = 8.0, 1.4 Hz, 1H), 6.95 (s, 2H), 4.14 (ddd,  $J$  = 12.6, 9.8, 6.3 Hz, 1H), 3.45 – 3.29 (m, 1H), 2.31 (s, 3H), 2.18 (s, 6H), 1.39 – 1.31 (m, 2H), 1.30 – 1.17 (m, 10H), 0.84 (t,  $J$  = 6.8 Hz, 3H).

$^{13}\text{C}$  NMR (101 MHz,  $\text{CDCl}_3$ )  $\delta$  144.50, 140.45, 139.23, 136.25, 134.51, 133.41, 133.22, 133.03, 132.61, 132.49, 130.30, 130.04, 121.64, 120.48 (q,  $J_{\text{C-F}}$  = 321.4 Hz), 114.61, 51.91, 31.79, 29.20, 28.54, 26.93, 23.73, 22.67, 21.12, 14.16.

$^{19}\text{F}$  NMR (376 MHz,  $\text{CDCl}_3$ )  $\delta$  -78.24.

HRMS  $m/z$  (ESI-TOF): calculated for  $\text{C}_{29}\text{H}_{37}\text{NO}_2\text{Si}^+ [\text{M-OTf}]^+$  590.1590, found 590.1591.

**Phenyl(2-((2,4,6-trimethyl-*N*-phenylphenyl)sulfonamido)phenyl)iodonium trifluoromethanesulfonate (1da)**

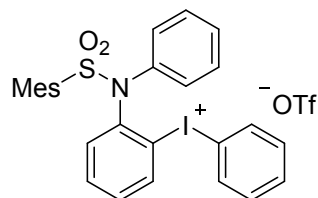

Prepared according to the **general procedure** on 4.5 mmol scale and a white powder (1.80 g, 57 %) was obtained through the procedure of trituration with diethyl ether.

M. p.: 161-163 °C.

$^1\text{H}$  NMR (400 MHz, DMSO)  $\delta$  8.47 (dd,  $J$  = 8.0, 1.2 Hz, 1H), 7.89 (d,  $J$  = 7.6 Hz, 2H), 7.71 (td,  $J$  = 7.7, 1.2 Hz, 1H), 7.57 (dt,  $J$  = 9.2, 4.3 Hz, 3H), 7.47 – 7.31 (m, 7H), 7.09 (s, 2H), 2.30 (s, 3H), 2.01 (s, 6H).

$^{13}\text{C}$  NMR (101 MHz, DMSO)  $\delta$  143.89, 140.17, 139.99, 139.40, 138.50, 134.75, 133.87, 132.42, 132.28, 132.12, 132.09, 131.91, 131.63, 129.53, 128.58, 128.21, 120.86, 120.71 (q,  $J_{\text{C-F}}$  = 323.4 Hz), 116.18, 22.87, 20.55.

$^{19}\text{F}$  NMR (376 MHz, DMSO)  $\delta$  -77.74.

HRMS  $m/z$  (ESI-TOF): calculated for  $\text{C}_{27}\text{H}_{25}\text{NO}_2\text{Si}^+ [\text{M-OTf}]^+$  554.0651, found 554.0642.

**Phenyl(2-((2,4,6-trimethyl-*N*-(*p*-tolyl)phenyl)sulfonamido)phenyl)iodonium trifluoromethanesulfonate (1ea)**

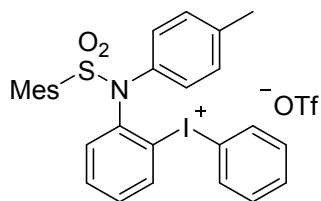

Prepared according to the **general procedure** on 4.5 mmol scale and a white powder (2.00 g, 62 %) was obtained through the procedure of trituration with diethyl ether.

M. p.: 138-140 °C.

$^1\text{H}$  NMR (400 MHz, DMSO)  $\delta$  8.43 (dd,  $J$  = 8.3, 1.3 Hz, 1H), 7.86 (d,  $J$  = 7.5 Hz, 2H), 7.75 – 7.65 (m, 1H), 7.65 – 7.52 (m, 3H), 7.41 (t,  $J$  = 7.9 Hz, 2H), 7.17 (m, 4H), 7.09 (s, 2H), 2.30 (s, 3H), 2.28 (s, 3H), 2.03 (s, 6H).

$^{13}\text{C}$  NMR (101 MHz, DMSO)  $\delta$  143.83, 140.48, 139.99, 138.48, 137.95, 136.86, 134.63, 133.82, 132.38, 132.19, 132.06, 131.92, 131.67, 131.57, 129.95, 128.52, 120.72, 120.70 (q,  $J_{\text{C-F}}$  = 323.7 Hz), 116.23, 22.93, 20.55, 20.51.

$^{19}\text{F}$  NMR (376 MHz, DMSO)  $\delta$  -77.74.

HRMS  $m/z$  (ESI-TOF): calculated for  $\text{C}_{28}\text{H}_{27}\text{NO}_2\text{SI}^+ [\text{M-OTf}]^+$  568.0807, found 568.0813.

**(2-((*N*-(4-(*tert*-Butyl)phenyl)-2,4,6-trimethylphenyl)sulfonamido)phenyl)(phenyl)iodonium trifluoromethanesulfonate (1fa)**

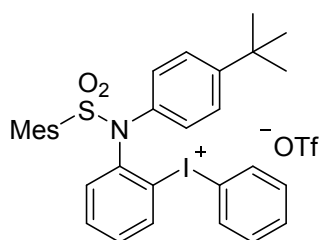

Prepared according to the **general procedure** on 4.5 mmol scale and a white powder (1.88 g, 55 %) was obtained through the procedure of trituration with diethyl ether.

M. p.: 165-167 °C.

$^1\text{H}$  NMR (400 MHz, DMSO)  $\delta$  8.45 (dd,  $J$  = 8.0, 1.3 Hz, 1H), 7.84 (d,  $J$  = 7.5 Hz, 2H), 7.72 (td,  $J$  = 7.7, 1.3 Hz, 1H), 7.64 – 7.49 (m, 3H), 7.39 (dd,  $J$  = 12.4, 5.4 Hz, 4H), 7.28 (d,  $J$  = 8.7 Hz, 2H), 7.08 (s, 2H), 2.30 (s, 3H), 2.01 (s, 6H), 1.26 (s, 9H).

$^{13}\text{C}$  NMR (101 MHz, DMSO)  $\delta$  150.94, 143.80, 140.34, 139.97, 138.45, 136.74, 134.66, 133.86, 132.37, 132.18, 132.09, 131.75, 131.60, 128.21, 126.23, 120.76, 120.70 (q,  $J_{\text{C-F}}$  = 323.6 Hz), 116.11, 34.37, 30.97, 22.80, 20.54.

$^{19}\text{F}$  NMR (376 MHz, DMSO)  $\delta$  -77.72.

HRMS  $m/z$  (ESI-TOF): calculated for  $\text{C}_{31}\text{H}_{33}\text{NO}_2\text{SI}^+ [\text{M-OTf}]^+$  610.1277, found 610.1254.

**(2-((*N*-(4-Bromophenyl)-2,4,6-trimethylphenyl)sulfonamido)phenyl)(phenyl)iodonium trifluoromethanesulfonate (1ga)**

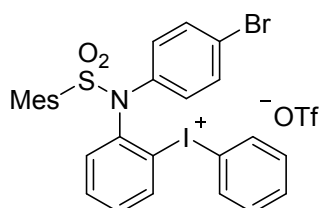

Prepared according to the **general procedure** on 4.5 mmol scale and a white powder (2.04 g, 58 %) was obtained through the procedure of trituration with diethyl ether.

M. p.: 178-180 °C.

$^1\text{H}$  NMR (400 MHz, DMSO)  $\delta$  8.54 (dd,  $J$  = 8.0, 1.3 Hz, 1H), 7.88 (d,  $J$  = 7.6 Hz, 2H), 7.72 (td,  $J$  = 7.7, 1.4 Hz, 1H), 7.66 – 7.56 (m, 2H), 7.52 (t,  $J$  = 5.9 Hz, 2H), 7.46 (dd,  $J$  = 7.9, 1.4 Hz, 1H), 7.40 (t,  $J$  = 7.9 Hz, 2H), 7.26 (t,  $J$  = 5.9 Hz, 2H), 7.09 (s, 2H), 2.30 (s, 3H), 2.02 (s, 6H).

$^{13}\text{C}$  NMR (101 MHz, DMSO)  $\delta$  144.06, 139.99, 139.62, 139.10, 138.83, 134.49, 133.99, 132.48, 132.33, 132.03, 131.95, 131.81, 131.48, 130.13, 120.97, 120.78, 120.70 (q,  $J_{\text{C-F}}$  = 323.7 Hz), 116.00, 22.86, 20.57.

$^{19}\text{F}$  NMR (376 MHz, DMSO)  $\delta$  -77.74.

HRMS  $m/z$  (ESI-TOF): calculated for  $\text{C}_{27}\text{H}_{24}\text{NO}_2\text{SBrI}^+$  [M-OTf] $^+$  631.9756, found 631.9762.

**(2-((*N*-Benzyl-2,4,6-trimethylphenyl)sulfonamido)phenyl)(phenyl)iodonium trifluoromethanesulfonate (1ha)**

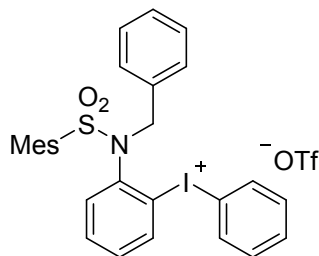

Prepared according to the **general procedure** on 4.5 mmol scale and a white powder (1.97 g, 61 %) was obtained through the procedure of trituration with diethyl ether.

M. p.: 203-205 °C.

$^1\text{H}$  NMR (400 MHz, DMSO)  $\delta$  7.74 – 7.64 (m, 2H), 7.57 – 7.49 (m, 4H), 7.50 – 7.45 (m, 2H), 7.43 – 7.35 (m, 4H), 7.35 – 7.29 (m, 2H), 7.12 (s, 2H), 5.44 (d,  $J$  = 13.0 Hz, 1H), 4.77 (d,  $J$  = 13.0 Hz, 1H), 2.30 (s, 3H), 2.20 (s, 6H).

$^{13}\text{C}$  NMR (101 MHz, DMSO)  $\delta$  143.87, 139.72, 137.55, 135.46, 134.86, 134.51, 132.95, 132.77, 132.64, 132.22, 131.95, 130.64, 130.15, 128.87, 128.57, 122.60, 120.70 (q,  $J_{\text{C-F}}$  = 323.5 Hz), 116.37, 54.70, 23.08, 20.48.

$^{19}\text{F}$  NMR (376 MHz, DMSO)  $\delta$  -77.73.

HRMS  $m/z$  (ESI-TOF): calculated for  $\text{C}_{28}\text{H}_{27}\text{NO}_2\text{SI}^+$  [M-OTf] $^+$  568.0807, found 568.0800.

**Phenyl(2-((2,4,6-trimethyl-*N*-(4-methylbenzyl)phenyl)sulfonamido)phenyl)iodonium trifluoromethanesulfonate (1ia)**

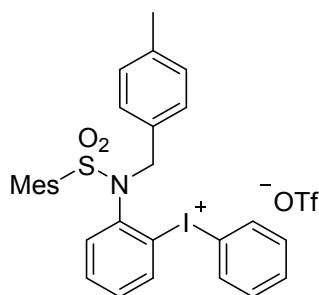

Prepared according to the **general procedure** on 4.5 mmol scale and a white powder (1.84 g, 56 %) was obtained through the procedure of trituration with diethyl ether.

M. p.: 195-196 °C.

$^1\text{H}$  NMR (400 MHz, DMSO)  $\delta$  7.71 (ddd,  $J$  = 14.3, 8.9, 6.0 Hz, 2H), 7.60 – 7.52 (m, 1H), 7.52 – 7.44 (m, 5H), 7.44 – 7.35 (m, 1H), 7.23 – 7.15 (m, 4H), 7.12 (s, 2H), 5.41 (d,  $J$  = 13.0 Hz, 1H), 4.72 (d,  $J$  = 12.9 Hz, 1H), 2.30 (s, 3H), 2.29 (s, 3H), 2.19 (s, 6H).

$^{13}\text{C}$  NMR (101 MHz, DMSO)  $\delta$  143.85, 139.69, 138.10, 137.56, 135.43, 134.90, 133.05, 132.89, 132.64, 132.29, 131.99, 131.43, 130.71, 130.22, 130.19, 129.38, 122.41, 120.70 (q,  $J_{\text{C-F}}$  = 323.7 Hz), 116.19, 54.54, 23.09, 20.71, 20.51.

$^{19}\text{F}$  NMR (376 MHz, DMSO)  $\delta$  -77.75.

HRMS  $m/z$  (ESI-TOF): calculated for  $\text{C}_{29}\text{H}_{29}\text{NO}_2\text{Si}^+ [\text{M-OTf}]^+$  582.0964, found 582.0958.

**(2-((*N*-(4-Methoxybenzyl)-2,4,6-trimethylphenyl)sulfonamido)phenyl)(phenyl)iodonium trifluoromethanesulfonate (1ja)**

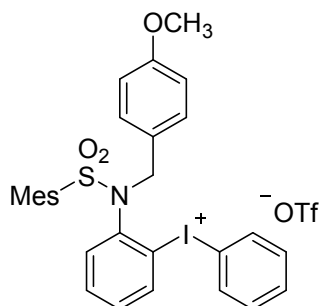

Prepared according to the **general procedure** on 4.5 mmol scale and a white powder (2.02 g, 60 %) was obtained through the procedure of trituration with diethyl ether.

M. p.: 175-177 °C.

$^1\text{H}$  NMR (400 MHz, DMSO)  $\delta$  7.72 (t,  $J$  = 7.4 Hz, 2H), 7.57 (m, 3H), 7.52 – 7.37 (m, 4H), 7.22 (d,  $J$  = 8.5 Hz, 2H), 7.12 (s, 2H), 6.91 (d,  $J$  = 8.5 Hz, 2H), 5.38 (d,  $J$  = 12.9 Hz, 1H), 4.71 (d,  $J$  = 13.0 Hz, 1H), 3.72 (s, 3H), 2.30 (s, 3H), 2.18 (s, 6H).

$^{13}\text{C}$  NMR (101 MHz, DMSO)  $\delta$  159.40, 143.85, 139.70, 137.59, 135.50, 134.95, 133.04, 132.94, 132.66, 132.28, 131.94, 131.57, 130.79, 130.24, 126.35, 122.61, 120.71 (q,  $J_{\text{C-F}}$  = 323.5 Hz), 116.29, 114.16, 55.25, 54.24, 23.12, 20.53.

$^{19}\text{F}$  NMR (376 MHz, DMSO)  $\delta$  -77.77.

HRMS  $m/z$  (ESI-TOF): calculated for  $\text{C}_{29}\text{H}_{29}\text{NO}_3\text{Si}^+ [\text{M-OTf}]^+$  598.0913, found 598.0926.

**Phenyl(2-((2,4,6-trimethyl-*N*-(4-nitrobenzyl)phenyl)sulfonamido)phenyl)iodonium trifluoromethanesulfonate (1ka)**

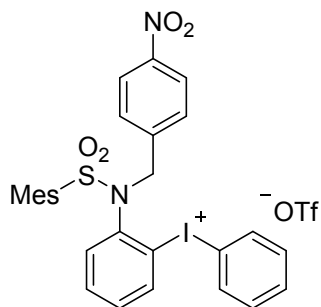

Prepared according to the **general procedure** on 4.5 mmol scale and a white powder (2.30 g, 67 %) was obtained through the procedure of column chromatography.

M. p.: 216-218 °C.

$^1\text{H}$  NMR (400 MHz, DMSO)  $\delta$  8.21 (d,  $J$  = 8.7 Hz, 2H), 7.89 – 7.82 (m, 1H), 7.77 – 7.67 (m, 3H), 7.64 (d,  $J$  = 8.6 Hz, 2H), 7.60 – 7.51 (m, 1H), 7.51 – 7.39 (m, 4H), 7.13 (s, 2H), 5.49 (d,  $J$  = 13.4 Hz, 1H), 4.96 (d,  $J$  = 13.4 Hz, 1H), 2.30 (s, 3H), 2.19 (s, 6H).

$^{13}\text{C}$  NMR (101 MHz, DMSO)  $\delta$  147.40, 144.14, 142.07, 139.91, 137.56, 135.48, 135.16, 133.22, 132.91, 132.75, 132.39, 131.99, 131.28, 130.47, 129.61, 123.91, 121.49, 120.70 (q,  $J_{\text{C-F}}$  = 323.6 Hz), 116.08, 53.46, 23.12, 20.52.

$^{19}\text{F}$  NMR (376 MHz, DMSO)  $\delta$  -77.75.

HRMS  $m/z$  (ESI-TOF): calculated for  $\text{C}_{28}\text{H}_{26}\text{N}_2\text{O}_4\text{SI}^+ [\text{M-OTf}]^+$  613.0658, found 613.0655.

**(2-((*N*,2-Dimethylphenyl)sulfonamido)phenyl)(phenyl)iodonium trifluoromethanesulfonate (1f)**

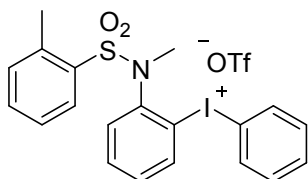

Prepared according to the **general procedure** on 4.5 mmol scale and a white powder (1.74 g, 63 %) was obtained through the procedure of trituration with diethyl ether.

M. p.: 151-152 °C.

$^1\text{H}$  NMR (400 MHz, DMSO)  $\delta$  8.33 – 8.17 (m, 3H), 7.72 (t,  $J$  = 7.4 Hz, 2H), 7.67 (t,  $J$  = 7.6 Hz, 1H), 7.58 (m, 3H), 7.51 (m, 3H), 6.92 (dd,  $J$  = 7.7, 1.7 Hz, 1H), 2.93 (s, 3H), 2.12 (s, 3H).

$^{13}\text{C}$  NMR (101 MHz, DMSO)  $\delta$  141.30, 137.93, 137.05, 135.79, 134.18, 133.55, 133.37, 133.16, 132.29, 131.78, 131.70, 130.48, 128.35, 126.97, 121.80, 120.69 (q,  $J_{\text{C-F}}$  = 323.7 Hz), 116.30, 39.10, 20.70.

$^{19}\text{F}$  NMR (376 MHz, DMSO)  $\delta$  -77.73.

HRMS  $m/z$  (ESI-TOF): calculated for  $\text{C}_{20}\text{H}_{19}\text{NO}_2\text{SI}^+ [\text{M-OTf}]^+$  464.0181, found 464.0168.

**(2-((2-Fluoro-*N*-methylphenyl)sulfonamido)phenyl)(phenyl)iodonium trifluoromethanesulfonate (1g)**

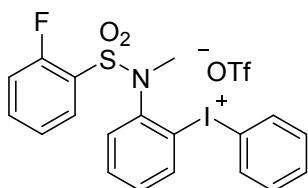

Prepared according to the **general procedure** on 4.5 mmol scale and a white powder (2.17 g, 78 %) was obtained through the procedure of trituration with diethyl ether.

M. p.: 126-127 °C.

<sup>1</sup>H NMR (400 MHz, DMSO) δ 8.37 (d, *J* = 7.9 Hz, 1H), 8.23 (d, *J* = 7.9 Hz, 2H), 7.87 (ddd, *J* = 8.2, 6.1, 1.6 Hz, 1H), 7.71 (t, *J* = 7.4 Hz, 1H), 7.66 – 7.49 (m, 6H), 7.45 (t, *J* = 7.6 Hz, 1H), 7.10 (d, *J* = 7.8 Hz, 1H), 2.96 (s, 3H).

<sup>13</sup>C NMR (101 MHz, DMSO) δ 158.35 (d, *J*<sub>C-F</sub> = 256.9 Hz), 141.23, 137.56, 137.31 (d, *J*<sub>C-F</sub> = 8.6 Hz), 135.78, 133.88, 132.28, 131.88, 131.78, 131.56, 128.43, 125.46 (d, *J*<sub>C-F</sub> = 3.2 Hz), 122.88 (d, *J*<sub>C-F</sub> = 14.0 Hz), 121.88, 120.71 (q, *J*<sub>C-F</sub> = 323.6 Hz), 118.16 (d, *J*<sub>C-F</sub> = 21.9 Hz), 116.24, 38.89.

<sup>19</sup>F NMR (376 MHz, DMSO) δ -77.74, -106.61.

HRMS *m/z* (ESI-TOF): calculated for C<sub>19</sub>H<sub>16</sub>NO<sub>2</sub>FSI<sup>+</sup> [M-OTf]<sup>+</sup> 467.9931, found 467.9939.

**(2-((2-Chloro-*N*-methylphenyl)sulfonamido)phenyl)(phenyl)iodonium trifluoromethanesulfonate (1h)**

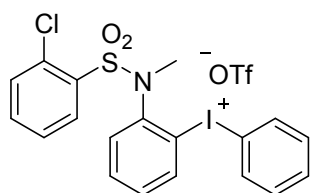

Prepared according to the **general procedure** on 4.5 mmol scale and a white powder (2.00 g, 70 %) was obtained through the procedure of trituration with diethyl ether.

M. p.: 143-145 °C.

<sup>1</sup>H NMR (400 MHz, DMSO) δ 8.33 (dd, *J* = 7.9, 1.3 Hz, 1H), 8.23 (d, *J* = 7.5 Hz, 2H), 7.82 – 7.74 (m, 3H), 7.71 (t, *J* = 7.4 Hz, 1H), 7.64 – 7.56 (m, 4H), 7.53 (td, *J* = 7.8, 1.4 Hz, 1H), 7.12 (dd, *J* = 7.8, 1.3 Hz, 1H), 3.05 (s, 3H).

<sup>13</sup>C NMR (101 MHz, DMSO) δ 141.11, 137.42, 135.75, 133.81, 133.27, 132.92, 132.71, 132.32, 131.90, 131.81, 131.43, 129.16, 128.19, 121.48, 120.71 (q, *J*<sub>C-F</sub> = 323.6 Hz), 116.28, 39.41.

<sup>19</sup>F NMR (376 MHz, DMSO) δ -77.74.

HRMS *m/z* (ESI-TOF): calculated for C<sub>19</sub>H<sub>16</sub>NO<sub>2</sub>ClSI<sup>+</sup> [M-OTf]<sup>+</sup> 483.9635, found 483.9638.

**(2-((2-Bromo-*N*-methylphenyl)sulfonamido)phenyl)(phenyl)iodonium trifluoromethanesulfonate (1i)**

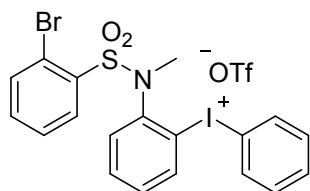

Prepared according to the **general procedure** on 4.5 mmol scale and a white powder (1.83 g, 60 %) was obtained through the procedure of column chromatography.

M. p.: 129-131 °C.

<sup>1</sup>H NMR (400 MHz, DMSO) δ 8.31 (dd, *J* = 8.0, 1.4 Hz, 1H), 8.26 – 8.20 (m, 2H), 7.94 (dd, *J* = 7.6, 1.5 Hz, 1H), 7.80 (dd, *J* = 7.6, 2.0 Hz, 1H), 7.71 (t, *J* = 7.4 Hz, 1H), 7.69 – 7.61 (m, 2H), 7.61 – 7.56 (m, 3H), 7.53 (td, *J* = 7.7, 1.6 Hz, 1H), 7.10 (dd, *J* = 7.9, 1.5 Hz, 1H), 3.08 (s, 3H).

<sup>13</sup>C NMR (101 MHz, DMSO) δ 141.11, 137.34, 136.48, 135.71, 135.54, 135.04, 133.81, 132.78, 132.30, 131.90, 131.79, 129.26, 128.64, 121.34, 120.69 (q, *J*<sub>C-F</sub> = 323.4 Hz), 119.82, 116.22, 40.00.

$^{19}\text{F}$  NMR (376 MHz, DMSO)  $\delta$  -77.73.

HRMS  $m/z$  (ESI-TOF): calculated for  $\text{C}_{19}\text{H}_{16}\text{NO}_2\text{BrSi}^+ [\text{M-OTf}]^+$  527.9130, found 527.9133.

**Phenyl(2-((*N*,2,5-trimethylphenyl)sulfonamido)phenyl)iodonium trifluoromethanesulfonate (1j)**

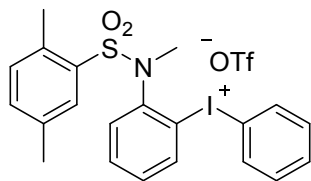

Prepared according to the **general procedure** on 4.5 mmol scale and a white powder (1.64 g, 58 %) was obtained through the procedure of column chromatography.

M. p.: 153-154 °C.

$^1\text{H}$  NMR (400 MHz, DMSO)  $\delta$  8.25 (t,  $J$  = 7.6 Hz, 3H), 7.72 (t,  $J$  = 7.4 Hz, 1H), 7.59 (t,  $J$  = 7.9 Hz, 3H), 7.51 (m, 3H), 7.32 (d,  $J$  = 7.7 Hz, 1H), 6.92 (d,  $J$  = 7.7 Hz, 1H), 2.92 (s, 3H), 2.35 (s, 3H), 2.03 (s, 3H).

$^{13}\text{C}$  NMR (101 MHz, DMSO)  $\delta$  141.35, 136.97, 136.52, 135.84, 134.85, 133.51, 133.26, 132.71, 132.36, 131.83, 131.71, 130.54, 128.35, 121.59, 120.70 (q,  $J_{\text{C-F}}$  = 323.4 Hz), 116.14, 39.10, 20.36, 20.24.

$^{19}\text{F}$  NMR (376 MHz, DMSO)  $\delta$  -77.73.

HRMS  $m/z$  (ESI-TOF): calculated for  $\text{C}_{21}\text{H}_{21}\text{NO}_2\text{Si}^+ [\text{M-OTf}]^+$  478.0338, found 478.0340.

**(2-(*N*-Methylnaphthalene-1-sulfonamido)phenyl)(phenyl)iodonium trifluoromethanesulfonate (1k)**

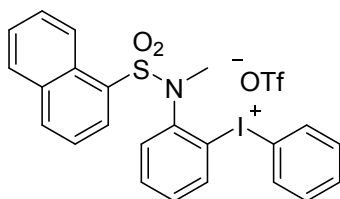

Prepared according to the **general procedure** on 4.5 mmol scale and a white powder (1.58 g, 54 %) was obtained through the procedure of column chromatography.

M. p.: 138-140 °C.

$^1\text{H}$  NMR (400 MHz, DMSO)  $\delta$  8.40 (d,  $J$  = 8.2 Hz, 1H), 8.34 (dd,  $J$  = 8.1, 1.2 Hz, 1H), 8.26 (d,  $J$  = 7.5 Hz, 2H), 8.18 (d,  $J$  = 8.8 Hz, 1H), 8.13 (d,  $J$  = 8.1 Hz, 1H), 8.08 (dd,  $J$  = 7.5, 1.0 Hz, 1H), 7.73 (td,  $J$  = 7.7, 3.0 Hz, 2H), 7.69 – 7.54 (m, 3H), 7.53 – 7.43 (m, 2H), 7.34 (td,  $J$  = 7.8, 1.3 Hz, 1H), 6.70 (dd,  $J$  = 8.0, 1.3 Hz, 1H), 2.91 (s, 3H).

$^{13}\text{C}$  NMR (101 MHz, DMSO)  $\delta$  141.27, 137.28, 135.85, 135.81, 134.05, 133.37, 132.34, 131.84, 131.77, 131.68, 130.47, 129.21, 129.01, 128.48, 128.12, 127.13, 124.74, 124.53, 121.72, 120.71 (q,  $J_{\text{C-F}}$  = 323.4 Hz), 116.13, 39.10.

$^{19}\text{F}$  NMR (376 MHz, DMSO)  $\delta$  -77.71.

HRMS  $m/z$  (ESI-TOF): calculated for  $\text{C}_{23}\text{H}_{19}\text{NO}_2\text{Si}^+ [\text{M-OTf}]^+$  500.0181, found 500.0180.

**Phenyl(2-((2,4,6-triisopropyl-*N*-methylphenyl)sulfonamido)phenyl)iodonium trifluoromethanesulfonate (1l)**

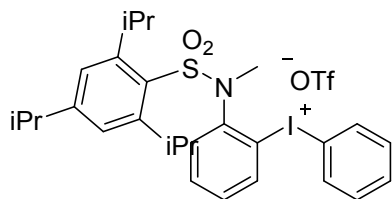

Prepared according to the **general procedure** on 4.5 mmol scale and a white powder (1.73 g, 53 %) was obtained through the procedure of column chromatography.

M. p.: 183-185 °C.

$^1\text{H}$  NMR (400 MHz,  $\text{CDCl}_3$ )  $\delta$  8.20 – 8.08 (m, 2H), 7.74 (dd,  $J$  = 8.2, 1.2 Hz, 1H), 7.67 (t,  $J$  = 7.5 Hz, 1H), 7.56 – 7.44 (m, 3H), 7.38 – 7.30 (m, 1H), 7.15 (s, 2H), 7.07 (dd,  $J$  = 8.0, 1.4 Hz, 1H), 3.38 (s, 3H), 3.37 – 3.30 (m, 2H), 2.89 (m, 1H), 1.25 (s, 3H), 1.23 (s, 3H), 1.17 (s, 3H), 1.15 (s, 3H), 0.97 (s, 3H), 0.96 (s, 3H).

$^{13}\text{C}$  NMR (101 MHz,  $\text{CDCl}_3$ )  $\delta$  154.55, 151.86, 141.58, 136.51, 135.15, 133.70, 133.13, 132.54, 132.10, 128.86, 128.61, 124.77, 120.48 (q,  $J_{\text{C-F}}$  = 321.6 Hz), 120.19, 114.79, 39.31, 34.24, 30.89, 25.42, 24.82, 23.54.

$^{19}\text{F}$  NMR (376 MHz,  $\text{CDCl}_3$ )  $\delta$  -78.24.

HRMS  $m/z$  (ESI-TOF): calculated for  $\text{C}_{28}\text{H}_{35}\text{NO}_2\text{SI}^+$  [M-OTf] $^+$  576.1433, found 576.1434.

**(2-((4-Methoxy-*N*-methylphenyl)sulfonamido)phenyl)(phenyl)iodonium trifluoromethanesulfonate (1m)**

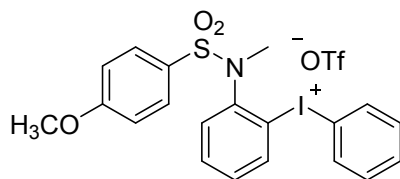

Prepared according to the **general procedure** on 4.5 mmol scale and a white powder (2.07 g, 73 %) was obtained through the procedure of trituration with diethyl ether.

M. p.: 144-145 °C.

$^1\text{H}$  NMR (400 MHz, DMSO)  $\delta$  8.31 (d,  $J$  = 8.0 Hz, 1H), 8.23 (d,  $J$  = 8.3 Hz, 2H), 7.71 (t,  $J$  = 7.4 Hz, 1H), 7.65 – 7.43 (m, 6H), 7.20 (t,  $J$  = 5.9 Hz, 2H), 6.94 – 6.80 (m, 1H), 3.88 (s, 3H), 2.85 (s, 3H).

$^{13}\text{C}$  NMR (101 MHz, DMSO)  $\delta$  163.52, 141.89, 137.11, 135.79, 133.71, 132.22, 131.74, 131.58, 130.49, 127.88, 125.94, 122.28, 120.69 (q,  $J_{\text{C-F}}$  = 322.1 Hz), 116.18, 114.81, 55.87, 38.89.

$^{19}\text{F}$  NMR (376 MHz, DMSO)  $\delta$  -77.73.

HRMS  $m/z$  (ESI-TOF): calculated for  $\text{C}_{20}\text{H}_{19}\text{NO}_3\text{SI}^+$  [M-OTf] $^+$  480.0130, found 480.0115.

**(2-(*N*-Methylphenylsulfonamido)phenyl)(phenyl)iodonium trifluoromethanesulfonate (1n)**

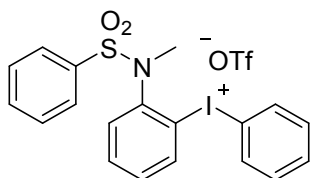

Prepared according to the **general procedure** on 4.5 mmol scale and a white powder (1.48 g, 55 %) was obtained through the procedure of column chromatography.

M. p.: 177-179 °C.

$^1\text{H}$  NMR (400 MHz, DMSO)  $\delta$  8.35 (d,  $J$  = 7.8 Hz, 1H), 8.23 (d,  $J$  = 7.8 Hz, 2H), 7.83 (t,  $J$  = 7.1 Hz, 1H), 7.73 – 7.67 (m, 3H), 7.64 (d,  $J$  = 7.6 Hz, 2H), 7.61 – 7.48 (m, 4H), 6.82 (d,  $J$  = 7.9 Hz, 1H), 2.88 (s, 3H).

$^{13}\text{C}$  NMR (101 MHz, DMSO)  $\delta$  141.67, 137.33, 135.76, 134.59, 134.29, 133.75, 132.22, 131.73, 129.69, 129.45, 128.15, 127.92, 127.60, 122.24, 120.70 (q,  $J_{\text{C-F}}$  = 323.7 Hz), 116.28, 39.04.

$^{19}\text{F}$  NMR (376 MHz, DMSO)  $\delta$  -77.72.

HRMS  $m/z$  (ESI-TOF): calculated for  $\text{C}_{19}\text{H}_{17}\text{NO}_2\text{Si}^+$  [M-OTf] $^+$  450.0025, found 450.0026.

**(2-((*N*,4-Dimethylphenyl)sulfonamido)phenyl)(phenyl)iodonium trifluoromethanesulfonate (1o)**

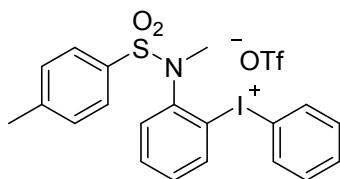

Prepared according to the **general procedure** on 4.5 mmol scale and a white powder (2.23 g, 81 %) was obtained through the procedure of trituration with diethyl ether.

M. p.: 127-129 °C.

$^1\text{H}$  NMR (400 MHz, DMSO)  $\delta$  8.33 (dd,  $J$  = 8.0, 1.0 Hz, 1H), 8.23 (d,  $J$  = 7.8 Hz, 2H), 7.71 (t,  $J$  = 7.4 Hz, 1H), 7.64 – 7.56 (m, 3H), 7.55 – 7.46 (m, 5H), 6.85 (dd,  $J$  = 7.9, 1.4 Hz, 1H), 2.86 (s, 3H), 2.44 (s, 3H).

$^{13}\text{C}$  NMR (101 MHz, DMSO)  $\delta$  144.89, 141.79, 137.25, 135.80, 133.78, 132.28, 131.77, 131.69, 131.67, 130.12, 128.23, 127.91, 122.06, 120.70 (q,  $J_{\text{C-F}}$  = 323.5 Hz), 116.08, 38.95, 21.15.

$^{19}\text{F}$  NMR (376 MHz, DMSO)  $\delta$  -77.73.

HRMS  $m/z$  (ESI-TOF): calculated for  $\text{C}_{20}\text{H}_{19}\text{NO}_2\text{Si}^+$  [M-OTf] $^+$  464.0181, found 464.0184.

**(2-((4-(*tert*-Butyl)-*N*-methylphenyl)sulfonamido)phenyl)(phenyl)iodonium trifluoromethanesulfonate (1p)**

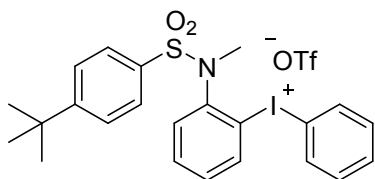

Prepared according to the **general procedure** on 4.5 mmol scale and a white powder (1.80 g, 61 %) was obtained through the procedure of column chromatography.

M. p.: 78-80 °C.

$^1\text{H}$  NMR (400 MHz,  $\text{CDCl}_3$ )  $\delta$  8.12 (dd,  $J$  = 8.4, 0.9 Hz, 2H), 7.71 (dd,  $J$  = 8.2, 1.3 Hz, 1H), 7.69 – 7.62 (m, 1H), 7.56 – 7.48 (m, 4H), 7.48 – 7.43 (m, 3H), 7.41 – 7.31 (m, 1H), 6.79 (dd,  $J$  = 8.0, 1.5 Hz, 1H), 3.21 (s, 3H), 1.33 (s, 9H).

$^{13}\text{C}$  NMR (101 MHz,  $\text{CDCl}_3$ )  $\delta$  158.73, 141.57, 136.56, 134.95, 133.47, 133.20, 132.58, 132.23, 130.52, 128.61, 127.56, 126.52, 120.48 (q,  $J_{\text{C-F}}$  = 321.5 Hz), 119.97, 114.17, 39.22, 35.51, 31.10.

$^{19}\text{F}$  NMR (376 MHz,  $\text{CDCl}_3$ )  $\delta$  -78.21.

HRMS  $m/z$  (ESI-TOF): calculated for  $\text{C}_{23}\text{H}_{25}\text{NO}_2\text{Si}^+$  [M-OTf] $^+$  506.0651, found 506.0656.

**(2-(*N*-Methyl-[1,1'-biphenyl]-4-sulfonamido)phenyl)(phenyl)iodonium trifluoromethanesulfonate (1q)**

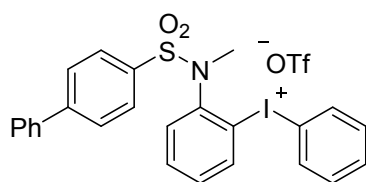

Prepared according to the **general procedure** on 4.5 mmol scale and a white powder (1.76 g, 58 %) was obtained through the procedure of column chromatography.

M. p.: 147-149 °C.

<sup>1</sup>H NMR (400 MHz, DMSO)  $\delta$  8.37 (dd,  $J$  = 8.0, 1.3 Hz, 1H), 8.25 (d,  $J$  = 7.5 Hz, 2H), 8.00 (d,  $J$  = 8.6 Hz, 2H), 7.85 – 7.75 (m, 2H), 7.72 (t,  $J$  = 7.4 Hz, 3H), 7.66 – 7.57 (m, 3H), 7.55 (ddd,  $J$  = 7.7, 3.4, 1.6 Hz, 3H), 7.50 – 7.44 (m, 1H), 6.96 (dd,  $J$  = 7.9, 1.5 Hz, 1H), 2.91 (s, 3H).

<sup>13</sup>C NMR (101 MHz, DMSO)  $\delta$  145.44, 141.75, 137.97, 137.37, 135.79, 133.88, 133.32, 132.27, 131.78, 131.74, 129.24, 128.93, 128.91, 128.07, 127.68, 127.18, 122.13, 120.71 (q,  $J_{C-F}$  = 323.6 Hz), 116.15, 39.04.

<sup>19</sup>F NMR (376 MHz, DMSO)  $\delta$  -77.72.

HRMS  $m/z$  (ESI-TOF): calculated for C<sub>25</sub>H<sub>21</sub>NO<sub>2</sub>Si<sup>+</sup> [M-OTf]<sup>+</sup> 526.0338, found 526.0335.

**(2-((*N*-Methyl-4-(trifluoromethyl)phenyl)sulfonamido)phenyl)(phenyl)iodonium trifluoromethanesulfonate (1r)**

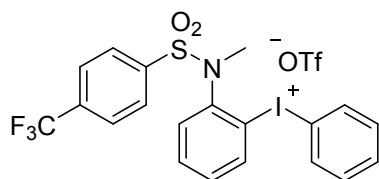

Prepared according to the **general procedure** on 4.5 mmol scale and a white powder (1.62 g, 54 %) was obtained through the procedure of column chromatography.

M. p.: 154-155 °C.

<sup>1</sup>H NMR (400 MHz, DMSO)  $\delta$  8.41 (dd,  $J$  = 7.9, 1.0 Hz, 1H), 8.24 (d,  $J$  = 7.7 Hz, 2H), 8.07 (d,  $J$  = 8.4 Hz, 2H), 7.87 (d,  $J$  = 8.2 Hz, 2H), 7.71 (t,  $J$  = 7.4 Hz, 1H), 7.66 – 7.50 (m, 4H), 6.98 (dd,  $J$  = 7.8, 1.4 Hz, 1H), 2.92 (s, 3H).

<sup>13</sup>C NMR (101 MHz, DMSO)  $\delta$  141.40, 138.67, 137.64, 135.75, 134.06, 133.60 (q,  $J_{C-F}$  = 32.5 Hz), 132.28, 131.93, 131.77, 129.26, 128.23, 126.92 (q,  $J_{C-F}$  = 3.5 Hz), 123.38 (q,  $J_{C-F}$  = 274.3 Hz), 122.03, 120.70 (q,  $J_{C-F}$  = 323.6 Hz), 116.22, 39.10.

<sup>19</sup>F NMR (376 MHz, DMSO)  $\delta$  -61.71, -77.76.

HRMS  $m/z$  (ESI-TOF): calculated for C<sub>20</sub>H<sub>16</sub>NO<sub>2</sub>SF<sub>3</sub>I<sup>+</sup> [M-OTf]<sup>+</sup> 517.9899, found 517.9899.

**(2-((*N*-Methyl-4-nitrophenyl)sulfonamido)phenyl)(phenyl)iodonium trifluoromethanesulfonate (1s)**

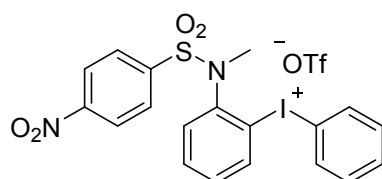

Prepared according to the **general procedure** on 4.5 mmol scale and a white powder (2.03 g, 70 %) was obtained through the procedure of trituration with diethyl ether.

M. p.: 165-166 °C.

<sup>1</sup>H NMR (400 MHz, DMSO) δ 8.47 (d, *J* = 8.9 Hz, 2H), 8.42 (dd, *J* = 7.8, 1.5 Hz, 1H), 8.23 (d, *J* = 7.9 Hz, 2H), 7.91 (d, *J* = 8.9 Hz, 2H), 7.71 (t, *J* = 7.4 Hz, 1H), 7.65 – 7.52 (m, 4H), 6.96 (dd, *J* = 7.7, 1.6 Hz, 1H), 2.93 (s, 3H).

<sup>13</sup>C NMR (101 MHz, DMSO) δ 150.56, 141.24, 140.04, 137.67, 135.69, 134.05, 132.21, 131.98, 131.72, 129.86, 129.13, 128.27, 124.92, 124.80, 122.16, 120.68 (q, *J*<sub>C-F</sub> = 323.6 Hz), 116.41, 39.21.

<sup>19</sup>F NMR (376 MHz, DMSO) δ -77.74.

HRMS *m/z* (ESI-TOF): calculated for C<sub>19</sub>H<sub>16</sub>N<sub>2</sub>O<sub>4</sub>Si<sup>+</sup> [M-OTf]<sup>+</sup> 494.9876, found 494.9866.

### Part 3. Optimization of Desulfonylative *ipso*-Substitution Cascade reaction <sup>[a]</sup>

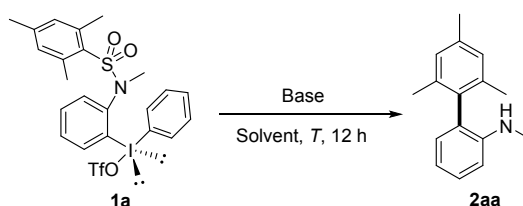

| Entry | Base                              | Solvent           | <i>T</i> [°C] | Yield [%] <sup>[b]</sup> |
|-------|-----------------------------------|-------------------|---------------|--------------------------|
| 1     | Morpholine                        | MeCN              | 50            | 11                       |
| 2     | 4-Methylmorpholine                | MeCN              | 50            | 6                        |
| 3     | DIPEA                             | MeCN              | 50            | 68                       |
| 4     | Et <sub>3</sub> N                 | MeCN              | 50            | 70                       |
| 5     | 1-Ethylpiperidine                 | MeCN              | 50            | 39                       |
| 6     | DBU                               | MeCN              | 50            | Trace                    |
| 7     | DMAP                              | MeCN              | 50            | n. r.                    |
| 8     | Pyridine                          | MeCN              | 50            | n. r.                    |
| 9     | NH <sub>3</sub> ·H <sub>2</sub> O | MeCN              | 50            | n. r.                    |
| 10    | Na <sub>2</sub> CO <sub>3</sub>   | MeCN              | 50            | n. r.                    |
| 11    | Cs <sub>2</sub> CO <sub>3</sub>   | MeCN              | 50            | Trace                    |
| 12    | KOH                               | MeCN              | 50            | 8                        |
| 13    | K <sub>3</sub> PO <sub>4</sub>    | MeCN              | 50            | 5                        |
| 14    | KOtBu                             | MeCN              | 50            | 6                        |
| 15    | Et <sub>3</sub> N                 | Toluene           | 50            | 21                       |
| 16    | Et <sub>3</sub> N                 | DCE               | 50            | 45                       |
| 17    | Et <sub>3</sub> N                 | DMF               | 50            | 42                       |
| 18    | Et <sub>3</sub> N                 | DMSO              | 50            | 39                       |
| 19    | Et <sub>3</sub> N                 | THF               | 50            | 42                       |
| 20    | Et <sub>3</sub> N                 | 1,4-Dioxane       | 50            | 60                       |
| 21    | Et <sub>3</sub> N                 | CHCl <sub>3</sub> | 50            | 23                       |
| 22    | Et <sub>3</sub> N                 | TFE               | 50            | n. r.                    |
| 23    | Et <sub>3</sub> N                 | MeOH              | 50            | Trace                    |
| 24    | Et <sub>3</sub> N                 | H <sub>2</sub> O  | 50            | n. r.                    |
| 25    | Et <sub>3</sub> N                 | MeCN              | 80            | 86 (80 <sup>[c]</sup> )  |

|                   |                   |      |    |       |
|-------------------|-------------------|------|----|-------|
| 26                | /                 | MeCN | 80 | n. r. |
| 27 <sup>[d]</sup> | Et <sub>3</sub> N | MeCN | 80 | 34    |
| 28 <sup>[e]</sup> | Et <sub>3</sub> N | MeCN | 80 | 49    |

[a] Reaction conditions: **1a** (0.3 mmol), base (2 equiv.) in 5 mL solvent, temperature (see table). [b] Isolated yield. [c] 5.0 mmol scale. [d] 1.2 equiv. of base was used. [e] 1.5 equiv. of base was used. n. r. = no reaction. OTf = triflate. DCE = 1,2-dichloroethane, DMF = *N,N*-dimethylformamide, DMSO = dimethylsulfoxide, THF = tetrahydrofuran, TFE = 2,2,2-trifluoroethanol.

## Part 4. Synthesis and Characterization of Products from Desulfonylative Cascade Reactions.

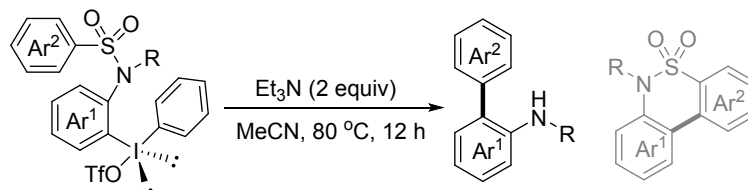

### General procedure:

To a Schlenk tube was added iodonium salts (0.3 mmol, 1 equiv.) and the tube was degassed with argon for three times. Acetonitrile (5 mL) and Et<sub>3</sub>N (0.6 mmol, 2.0 equiv.) was added via syringe, and the mixture was stirred at 80 °C in an oil bath for 12 h. The solvent was evaporated under vacuum. The crude products were purified using flash column chromatography on silica gel to afford the desired products.

### *N*,2',4',6'-Tetramethyl-[1,1'-biphenyl]-2-amine (2aa)

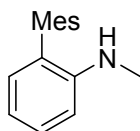

Prepared according to the general procedure on 0.3 mmol scale and obtained an isolated yield of 86% (58 mg) as a white solid.

M. p.: 45-46 °C.

<sup>1</sup>H NMR (400 MHz, CDCl<sub>3</sub>) δ 7.31 – 7.26 (m, 1H), 6.99 (s, 2H), 6.90 (dd, *J* = 7.3, 1.6 Hz, 1H), 6.78 (td, *J* = 7.3, 1.0 Hz, 1H), 6.71 (d, *J* = 8.1 Hz, 1H), 3.32 (br, 1H), 2.78 (s, 3H), 2.35 (s, 3H), 2.00 (s, 6H).

<sup>13</sup>C NMR (101 MHz, CDCl<sub>3</sub>) δ 146.39, 137.48, 137.13, 134.94, 129.57, 128.58, 128.35, 125.99, 116.96, 109.59, 30.83, 21.22, 20.24.

HRMS *m/z* (EI-TOF): calculated for C<sub>16</sub>H<sub>19</sub>N [M]<sup>+</sup> 225.1517, found 225.1519.

### *N*,2',4',5,6'-Pentamethyl-[1,1'-biphenyl]-2-amine (2ab)

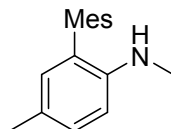

Prepared according to the general procedure on 0.3 mmol scale and obtained an isolated yield of 72% (52 mg) as a colorless oil.

<sup>1</sup>H NMR (400 MHz, CDCl<sub>3</sub>) δ 7.10 (dd, *J* = 8.2, 1.6 Hz, 1H), 6.98 (s, 2H), 6.73 (d, *J* = 2.0 Hz, 1H), 6.64 (d, *J* = 8.2 Hz, 1H), 3.18 (br, 1H), 2.77 (s, 3H), 2.35 (s, 3H), 2.29 (s, 3H), 2.01 (s, 6H).

<sup>13</sup>C NMR (101 MHz, CDCl<sub>3</sub>) δ 144.24, 137.38, 136.98, 135.11, 130.20, 128.66, 128.52, 126.15, 126.02, 109.86, 31.20, 21.20, 20.61, 20.29.

HRMS *m/z* (EI-TOF): calculated for C<sub>17</sub>H<sub>21</sub>N [M]<sup>+</sup> 239.1674, found 239.1673.

***N*,2',4,4',6'-Pentamethyl-[1,1'-biphenyl]-2-amine (2ac)**

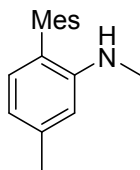

Prepared according to the general procedure on 0.3 mmol scale and obtained an isolated yield of 89% (64 mg) as a white solid.

M. p.: 43-45 °C.

<sup>1</sup>H NMR (400 MHz, CDCl<sub>3</sub>) δ 6.97 (s, 2H), 6.78 (d, *J* = 7.4 Hz, 1H), 6.60 (d, *J* = 7.5 Hz, 1H), 6.53 (s, 1H), 3.26 (br, 1H), 2.77 (s, 3H), 2.39 (s, 3H), 2.34 (s, 3H), 2.00 (s, 6H).

<sup>13</sup>C NMR (101 MHz, CDCl<sub>3</sub>) δ 146.25, 138.00, 137.68, 136.99, 134.96, 129.39, 128.53, 123.20, 117.75, 110.53, 30.85, 21.97, 21.21, 20.31.

HRMS *m/z* (EI-TOF): calculated for C<sub>17</sub>H<sub>21</sub>N [M]<sup>+</sup> 239.1674, found 239.1678.

**5-Methoxy-*N*,2',4,6'-tetramethyl-[1,1'-biphenyl]-2-amine (2ad)**

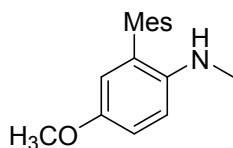

Prepared according to the general procedure on 0.3 mmol scale and obtained an isolated yield of 83% (63 mg) as a colorless oil.

<sup>1</sup>H NMR (400 MHz, CDCl<sub>3</sub>) δ 6.97 (s, 2H), 6.87 (dd, *J* = 8.7, 3.0 Hz, 1H), 6.66 (d, *J* = 8.8 Hz, 1H), 6.55 (d, *J* = 3.0 Hz, 1H), 3.76 (s, 3H), 3.02 (br, 1H), 2.75 (s, 3H), 2.34 (s, 3H), 2.00 (s, 6H).

<sup>13</sup>C NMR (101 MHz, CDCl<sub>3</sub>) δ 151.76, 140.96, 137.29, 137.24, 134.81, 128.57, 127.34, 115.80, 113.29, 110.89, 55.88, 31.71, 21.19, 20.21.

HRMS *m/z* (EI-TOF): calculated for C<sub>17</sub>H<sub>21</sub>NO [M]<sup>+</sup> 255.1623, found 255.1622.

***N*,2'',4'',6''-Tetramethyl-[1,1':3',1''-terphenyl]-4'-amine (2ae)**

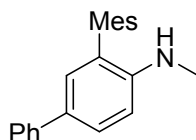

Prepared according to the general procedure on 0.3 mmol scale and obtained an isolated yield of 74% (67 mg) as a colorless oil.

<sup>1</sup>H NMR (400 MHz, CDCl<sub>3</sub>) δ 7.66 – 7.53 (m, 3H), 7.45 – 7.33 (m, 2H), 7.25 (m, 2H), 7.00 (s, 2H), 6.77 (d, *J* = 8.4 Hz, 1H), 3.41 (br, 1H), 2.82 (s, 3H), 2.36 (s, 3H), 2.04 (s, 6H).

<sup>13</sup>C NMR (101 MHz, CDCl<sub>3</sub>) δ 145.90, 141.40, 137.53, 137.30, 134.78, 129.64, 128.77, 128.65, 128.16, 126.84, 126.32, 126.22, 125.99, 109.88, 30.83, 21.23, 20.33.

HRMS *m/z* (EI-TOF): calculated for C<sub>22</sub>H<sub>23</sub>N [M]<sup>+</sup> 301.1830, found 301.1829.

**5-Fluoro-*N*,2',4',6'-tetramethyl-[1,1'-biphenyl]-2-amine (2af)**

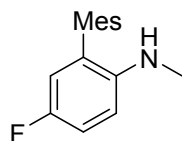

Prepared according to the general procedure on 0.3 mmol scale and obtained an isolated yield of 41% (30 mg) as a white solid.

M. p.: 67-69 °C.

$^1\text{H}$  NMR (400 MHz,  $\text{CDCl}_3$ )  $\delta$  7.03 – 6.90 (m, 3H), 6.67 (dd,  $J$  = 9.0, 3.0 Hz, 1H), 6.60 (dd,  $J$  = 8.9, 4.7 Hz, 1H), 3.16 (br, 1H), 2.75 (s, 3H), 2.34 (s, 3H), 1.99 (s, 6H).

$^{13}\text{C}$  NMR (101 MHz,  $\text{CDCl}_3$ )  $\delta$  155.60 (d,  $J_{\text{C-F}}$  = 235.4 Hz), 142.93 (d,  $J_{\text{C-F}}$  = 1.5 Hz), 137.54, 137.22, 133.89, 128.69, 127.11 (d,  $J_{\text{C-F}}$  = 7.3 Hz), 116.31 (d,  $J_{\text{C-F}}$  = 22.0 Hz), 114.31 (d,  $J_{\text{C-F}}$  = 21.8 Hz), 110.21 (d,  $J_{\text{C-F}}$  = 7.9 Hz), 31.36, 21.21, 20.12.

$^{19}\text{F}$  NMR (376 MHz,  $\text{CDCl}_3$ )  $\delta$  -129.12.

HRMS  $m/z$  (EI-TOF): calculated for  $\text{C}_{16}\text{H}_{18}\text{NF}$   $[\text{M}]^+$  243.1423, found 243.1424.

**5-Chloro-*N*,2',4',6'-tetramethyl-[1,1'-biphenyl]-2-amine (2ag)**

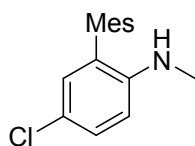

Prepared according to the general procedure on 0.3 mmol scale and obtained an isolated yield of 99% (77 mg) as a colorless oil.

$^1\text{H}$  NMR (400 MHz,  $\text{CDCl}_3$ )  $\delta$  7.22 (dd,  $J$  = 8.6, 2.5 Hz, 1H), 6.98 (s, 2H), 6.89 (d,  $J$  = 2.5 Hz, 1H), 6.61 (d,  $J$  = 8.7 Hz, 1H), 3.32 (d,  $J$  = 3.9 Hz, 1H), 2.76 (d,  $J$  = 5.0 Hz, 3H), 2.34 (s, 3H), 2.00 (s, 6H).

$^{13}\text{C}$  NMR (101 MHz,  $\text{CDCl}_3$ )  $\delta$  145.09, 137.59, 137.26, 133.56, 129.21, 128.71, 128.07, 127.44, 121.41, 110.58, 30.83, 29.85, 21.21, 20.15.

HRMS  $m/z$  (EI-TOF): calculated for  $\text{C}_{16}\text{H}_{18}\text{NCl}$   $[\text{M}]^+$  259.1128, found 259.1129.

**5-Bromo-*N*,2',4',6'-tetramethyl-[1,1'-biphenyl]-2-amine (2ah)**

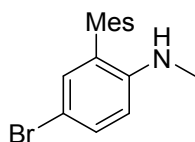

Prepared according to the general procedure on 0.3 mmol scale and obtained an isolated yield of 88% (80 mg) as a colorless oil.

$^1\text{H}$  NMR (400 MHz,  $\text{CDCl}_3$ )  $\delta$  7.35 (dd,  $J$  = 8.6, 2.4 Hz, 1H), 7.01 (d,  $J$  = 2.4 Hz, 1H), 6.97 (s, 2H), 6.56 (d,  $J$  = 8.7 Hz, 1H), 3.34 (d,  $J$  = 4.0 Hz, 1H), 2.75 (d,  $J$  = 5.0 Hz, 3H), 2.34 (s, 3H), 1.99 (s, 6H).

$^{13}\text{C}$  NMR (101 MHz,  $\text{CDCl}_3$ )  $\delta$  145.50, 137.61, 137.27, 133.46, 131.92, 130.97, 128.70, 127.92, 111.09, 108.50, 30.74, 29.85, 21.21, 20.17.

HRMS  $m/z$  (EI-TOF): calculated for  $\text{C}_{16}\text{H}_{18}\text{NBr}$   $[\text{M}]^+$  303.0623, found 303.0621.

**4-Chloro-*N*,2',4',6'-tetramethyl-[1,1'-biphenyl]-2-amine (2ai)**

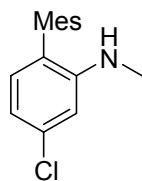

Prepared according to the general procedure on 0.3 mmol scale and obtained an isolated yield of 78% (61 mg) as a white solid.

M. p.: 67-69 °C.

$^1\text{H}$  NMR (400 MHz,  $\text{CDCl}_3$ )  $\delta$  6.97 (s, 2H), 6.80 (d,  $J$  = 7.9 Hz, 1H), 6.74 (dd,  $J$  = 7.9, 2.0 Hz, 1H), 6.66 (d,  $J$  = 2.0 Hz, 1H), 2.76 (s, 3H), 2.34 (s, 3H), 1.97 (s, 6H).

$^{13}\text{C}$  NMR (101 MHz,  $\text{CDCl}_3$ )  $\delta$  147.32, 137.53, 137.48, 134.06, 133.70, 130.50, 128.71, 124.37, 116.79, 109.71, 30.63, 21.21, 20.17.

HRMS  $m/z$  (EI-TOF): calculated for  $\text{C}_{16}\text{H}_{18}\text{NCl}$   $[M]^+$  259.1128, found 259.1129.

**4-Bromo-*N*,2',4',6'-tetramethyl-[1,1'-biphenyl]-2-amine (2aj)**

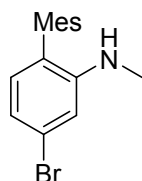

Prepared according to the general procedure on 0.3 mmol scale and obtained an isolated yield of 77% (70 mg) as a white solid.

M. p.: 54-56 °C.

$^1\text{H}$  NMR (400 MHz,  $\text{CDCl}_3$ )  $\delta$  6.97 (s, 2H), 6.88 (dd,  $J$  = 7.9, 1.9 Hz, 1H), 6.80 (d,  $J$  = 1.9 Hz, 1H), 6.74 (d,  $J$  = 7.9 Hz, 1H), 3.40 (d,  $J$  = 4.7 Hz, 1H), 2.76 (d,  $J$  = 5.2 Hz, 3H), 2.34 (s, 3H), 1.98 (s, 6H).

$^{13}\text{C}$  NMR (101 MHz,  $\text{CDCl}_3$ )  $\delta$  147.60, 137.52, 137.39, 133.71, 130.82, 128.70, 124.74, 122.29, 119.61, 112.40, 30.54, 21.20, 20.16.

HRMS  $m/z$  (EI-TOF): calculated for  $\text{C}_{16}\text{H}_{18}\text{NBr}$   $[M]^+$  303.0623, found 303.0620.

***N*,2',4',6'-Tetramethyl-5-nitro-[1,1'-biphenyl]-2-amine (2ak)**

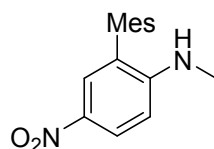

Prepared according to the general procedure on 0.3 mmol scale and obtained an isolated yield of 53% (43 mg) as a yellow solid.

M. p.: 171-173 °C.

$^1\text{H}$  NMR (400 MHz,  $\text{CDCl}_3$ )  $\delta$  8.21 (dd,  $J$  = 9.1, 2.7 Hz, 1H), 7.85 (d,  $J$  = 2.7 Hz, 1H), 6.99 (s, 2H), 6.62 (d,  $J$  = 9.1 Hz, 1H), 4.17 (br, 1H), 2.87 (s, 3H), 2.34 (s, 3H), 1.97 (s, 6H).

$^{13}\text{C}$  NMR (101 MHz,  $\text{CDCl}_3$ )  $\delta$  151.69, 138.36, 137.99, 137.31, 131.93, 129.04, 126.21, 126.02, 125.27, 107.77, 30.29, 21.22, 20.08.

HRMS  $m/z$  (EI-TOF): calculated for  $\text{C}_{16}\text{H}_{18}\text{N}_2\text{O}_2$   $[\text{M}]^+$  270.1368, found 270.1369.

***N*,2',4',6'-Tetramethyl-5-(trifluoromethyl)-[1,1'-biphenyl]-2-amine (2al)**

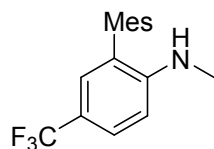

Prepared according to the general procedure on 0.3 mmol scale and obtained an isolated yield of 74% (65 mg) as a white solid.

M. p.: 82-84 °C.

$^1\text{H}$  NMR (400 MHz,  $\text{CDCl}_3$ )  $\delta$  7.51 (dd,  $J$  = 8.5, 1.7 Hz, 1H), 7.14 (d,  $J$  = 2.0 Hz, 1H), 6.99 (s, 2H), 6.69 (d,  $J$  = 8.5 Hz, 1H), 3.67 (d,  $J$  = 4.5 Hz, 1H), 2.81 (d,  $J$  = 5.2 Hz, 3H), 2.35 (s, 3H), 1.98 (s, 6H).

$^{13}\text{C}$  NMR (101 MHz,  $\text{CDCl}_3$ )  $\delta$  148.84, 137.80, 137.39, 133.36, 128.82, 126.66 (q,  $J_{\text{C-F}}$  = 3.7 Hz), 125.89 (q,  $J_{\text{C-F}}$  = 3.8 Hz), 125.52, 125.35 (q,  $J_{\text{C-F}}$  = 271.3 Hz), 118.44 (q,  $J_{\text{C-F}}$  = 32.5 Hz), 108.56, 30.37, 21.19, 20.12.

$^{19}\text{F}$  NMR (376 MHz,  $\text{CDCl}_3$ )  $\delta$  -60.63.

HRMS  $m/z$  (EI-TOF): calculated for  $\text{C}_{17}\text{H}_{18}\text{NF}_3$   $[\text{M}]^+$  293.1391, found 293.1390.

**2',4',6'-Trimethyl-6-(methylamino)-[1,1'-biphenyl]-3-carbonitrile (2am)**

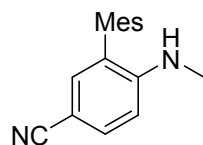

Prepared according to the general procedure on 0.3 mmol scale and obtained an isolated yield of 80% (60 mg) as a white solid.

M. p.: 102-104 °C.

$^1\text{H}$  NMR (400 MHz,  $\text{CDCl}_3$ )  $\delta$  7.54 (dd,  $J$  = 8.5, 2.0 Hz, 1H), 7.14 (d,  $J$  = 2.0 Hz, 1H), 6.98 (s, 2H), 6.64 (d,  $J$  = 8.5 Hz, 1H), 2.81 (s, 3H), 2.33 (s, 3H), 1.95 (s, 6H).

$^{13}\text{C}$  NMR (101 MHz,  $\text{CDCl}_3$ )  $\delta$  149.63, 138.13, 137.27, 133.39, 133.26, 132.23, 128.94, 126.15, 109.00, 98.51, 30.09, 21.20, 20.04.

HRMS  $m/z$  (EI-TOF): calculated for  $\text{C}_{17}\text{H}_{18}\text{N}_2$   $[\text{M}]^+$  250.1470, found 250.1469.

**Methyl 2',4',6'-trimethyl-6-(methylamino)-[1,1'-biphenyl]-3-carboxylate (2an)**

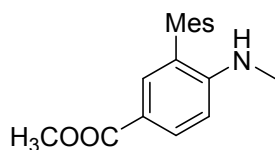

Prepared according to the general procedure on 0.3 mmol scale and obtained an isolated yield of 70% (59 mg) as a white solid.

M. p.: 157-159 °C.

$^1\text{H}$  NMR (400 MHz,  $\text{CDCl}_3$ )  $\delta$  7.98 (dd,  $J$  = 8.6, 2.0 Hz, 1H), 7.60 (d,  $J$  = 2.1 Hz, 1H), 6.97 (s, 2H), 6.65 (d,  $J$  = 8.6 Hz, 1H), 3.84 (s, 3H), 2.82 (d,  $J$  = 5.2 Hz, 3H), 2.33 (s, 3H), 1.97 (s, 6H).

$^{13}\text{C}$  NMR (101 MHz,  $\text{CDCl}_3$ )  $\delta$  167.73, 150.16, 137.58, 137.44, 133.54, 131.45, 131.02, 128.73, 125.05, 118.01, 108.24, 51.60, 30.24, 21.19, 20.13.

HRMS  $m/z$  (EI-TOF): calculated for  $\text{C}_{18}\text{H}_{21}\text{NO}_2$   $[\text{M}]^+$  283.1572, found 283.1571.

#### ***N*-Ethyl-2',4',6'-trimethyl-[1,1'-biphenyl]-2-amine (2ba)**

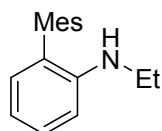

Prepared according to the general procedure on 0.3 mmol scale and obtained an isolated yield of 68% (49 mg) as a colorless oil.

$^1\text{H}$  NMR (400 MHz,  $\text{CDCl}_3$ )  $\delta$  7.28 – 7.20 (m, 1H), 6.98 (s, 2H), 6.89 (dd,  $J$  = 7.3, 1.6 Hz, 1H), 6.80 – 6.67 (m, 2H), 3.23 (br, 1H), 3.15 (d,  $J$  = 6.7 Hz, 2H), 2.35 (s, 3H), 2.00 (s, 6H), 1.11 (t,  $J$  = 7.0 Hz, 3H).

$^{13}\text{C}$  NMR (101 MHz,  $\text{CDCl}_3$ )  $\delta$  145.36, 137.41, 137.07, 134.95, 129.78, 128.58, 128.26, 126.10, 116.86, 110.22, 38.33, 21.23, 20.22, 15.00.

HRMS  $m/z$  (EI-TOF): calculated for  $\text{C}_{17}\text{H}_{21}\text{N}$   $[\text{M}]^+$  239.1674, found 239.1675.

#### **2',4',6'-Trimethyl-*N*-octyl-[1,1'-biphenyl]-2-amine (2ca)**

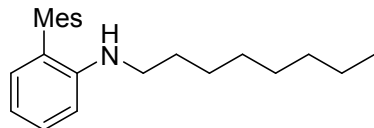

Prepared according to the general procedure on 0.3 mmol scale and obtained an isolated yield of 75% (73 mg) as a colorless oil.

$^1\text{H}$  NMR (400 MHz,  $\text{CDCl}_3$ )  $\delta$  7.28 – 7.20 (m, 1H), 6.98 (s, 2H), 6.89 (dd,  $J$  = 7.3, 1.6 Hz, 1H), 6.74 (ddd,  $J$  = 10.8, 8.5, 4.6 Hz, 2H), 3.29 (br, 1H), 3.08 (m, 2H), 2.35 (s, 3H), 2.00 (s, 6H), 1.53 – 1.41 (m, 2H), 1.35 – 1.16 (m, 10H), 0.89 (t,  $J$  = 6.9 Hz, 3H).

$^{13}\text{C}$  NMR (101 MHz,  $\text{CDCl}_3$ )  $\delta$  145.47, 137.44, 137.06, 134.95, 129.74, 128.58, 128.25, 126.01, 116.69, 110.09, 43.87, 31.91, 29.50, 29.43, 29.38, 27.17, 22.79, 21.23, 20.24, 14.25.

HRMS  $m/z$  (EI-TOF): calculated for  $\text{C}_{23}\text{H}_{33}\text{N}$   $[\text{M}]^+$  323.2613, found 323.2614.

#### **2',4',6'-Trimethyl-*N*-phenyl-[1,1'-biphenyl]-2-amine (2da)**

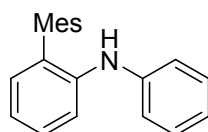

Prepared according to the general procedure on 0.3 mmol scale and obtained an isolated yield of 56% (48 mg) as a white solid.

M. p.: 97-99 °C.

$^1\text{H}$  NMR (400 MHz,  $\text{CDCl}_3$ )  $\delta$  7.39 (d,  $J$  = 8.2 Hz, 1H), 7.30 – 7.19 (m, 3H), 7.10 – 7.02 (m, 3H), 7.02 – 6.88 (m, 4H), 5.20 (br, 1H), 2.36 (s, 3H), 2.05 (s, 6H).

$^{13}\text{C}$  NMR (101 MHz,  $\text{CDCl}_3$ )  $\delta$  143.01, 140.92, 137.40, 137.32, 134.52, 130.52, 129.35, 129.02, 128.74, 127.88, 121.52, 120.44, 119.09, 115.44, 21.23, 20.40.

HRMS  $m/z$  (EI-TOF): calculated for  $\text{C}_{21}\text{H}_{21}\text{N}$   $[\text{M}]^+$  287.1674, found 287.1677.

**2',4',6'-Trimethyl-*N*-(*p*-tolyl)-[1,1'-biphenyl]-2-amine (2ea)**

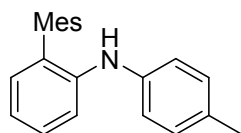

Prepared according to the general procedure on 0.3 mmol scale and obtained an isolated yield of 61% (55 mg) as a white solid.

M. p.: 92-93 °C.

$^1\text{H}$  NMR (400 MHz,  $\text{CDCl}_3$ )  $\delta$  7.32 – 7.27 (m, 1H), 7.26 – 7.19 (m, 1H), 7.06 (d,  $J$  = 8.3 Hz, 2H), 7.03 – 6.95 (m, 5H), 6.92 (td,  $J$  = 7.3, 1.2 Hz, 1H), 5.11 (br, 1H), 2.35 (s, 3H), 2.30 (s, 3H), 2.05 (s, 6H).

$^{13}\text{C}$  NMR (101 MHz,  $\text{CDCl}_3$ )  $\delta$  141.64, 140.30, 137.39, 137.35, 134.60, 131.40, 130.41, 129.87, 128.72, 128.40, 127.89, 120.06, 119.83, 114.72, 21.22, 20.84, 20.40.

HRMS  $m/z$  (EI-TOF): calculated for  $\text{C}_{22}\text{H}_{23}\text{N}$   $[\text{M}]^+$  301.1830, found 301.1829.

***N*-(4-(*tert*-Butyl)phenyl)-2',4',6'-trimethyl-[1,1'-biphenyl]-2-amine (2fa)**

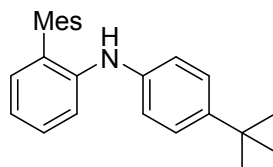

Prepared according to the general procedure on 0.3 mmol scale and obtained an isolated yield of 65% (67 mg) as a light yellow oil.

$^1\text{H}$  NMR (400 MHz,  $\text{CDCl}_3$ )  $\delta$  7.39 – 7.30 (m, 1H), 7.27 – 7.18 (m, 3H), 7.04 – 6.95 (m, 5H), 6.91 (td,  $J$  = 7.4, 1.1 Hz, 1H), 5.12 (br, 1H), 2.33 (s, 3H), 2.03 (s, 6H), 1.29 (s, 9H).

$^{13}\text{C}$  NMR (101 MHz,  $\text{CDCl}_3$ )  $\delta$  144.66, 141.44, 140.23, 137.37, 137.34, 134.60, 130.40, 128.72, 128.45, 127.86, 126.13, 119.85, 119.38, 114.79, 34.31, 31.58, 21.22, 20.42.

HRMS  $m/z$  (EI-TOF): calculated for  $\text{C}_{25}\text{H}_{29}\text{N}$   $[\text{M}]^+$  343.2300, found 343.2298.

***N*-(4-Bromophenyl)-2',4',6'-trimethyl-[1,1'-biphenyl]-2-amine (2ga)**

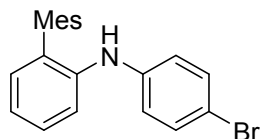

Prepared according to the general procedure on 0.3 mmol scale and obtained an isolated yield of 74% (81 mg) as a white solid.

M. p.: 96-98 °C.

<sup>1</sup>H NMR (400 MHz, CDCl<sub>3</sub>) δ 7.37 – 7.29 (m, 3H), 7.27 (m, 1H), 7.05 (dd, *J* = 7.5, 1.7 Hz, 1H), 7.00 (m, 3H), 6.96 – 6.88 (m, 2H), 5.16 (br, 1H), 2.35 (s, 3H), 2.02 (s, 6H).

<sup>13</sup>C NMR (101 MHz, CDCl<sub>3</sub>) δ 142.28, 140.25, 137.61, 137.52, 137.22, 134.28, 132.22, 130.68, 129.56, 128.78, 127.97, 121.15, 120.17, 116.01, 113.20, 21.22, 20.40.

HRMS *m/z* (EI-TOF): calculated for C<sub>21</sub>H<sub>20</sub>NBr [M]<sup>+</sup> 365.0779, found 365.0782.

***N*-Benzyl-2',4',6'-trimethyl-[1,1'-biphenyl]-2-amine (2ha)**

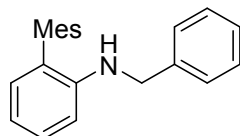

Prepared according to the general procedure on 0.3 mmol scale and obtained an isolated yield of 66% (59 mg) as a white solid.

M. p.: 57-59 °C.

<sup>1</sup>H NMR (400 MHz, CDCl<sub>3</sub>) δ 7.31 – 7.18 (m, 5H), 7.18 – 7.10 (m, 1H), 6.95 (s, 2H), 6.88 (dd, *J* = 7.4, 1.5 Hz, 1H), 6.73 (td, *J* = 7.4, 0.8 Hz, 1H), 6.62 (d, *J* = 8.1 Hz, 1H), 4.28 (d, *J* = 5.6 Hz, 2H), 3.81 (br, 1H), 2.30 (s, 3H), 2.02 (s, 6H).

<sup>13</sup>C NMR (101 MHz, CDCl<sub>3</sub>) δ 145.03, 140.02, 137.45, 137.19, 134.81, 129.78, 128.65, 128.61, 128.26, 127.00, 126.10, 117.27, 110.48, 47.85, 21.20, 20.31.

HRMS *m/z* (EI-TOF): calculated for C<sub>22</sub>H<sub>23</sub>N [M]<sup>+</sup> 301.1830, found 301.1832.

**2',4',6'-Trimethyl-*N*-(4-methylbenzyl)-[1,1'-biphenyl]-2-amine (2ia)**

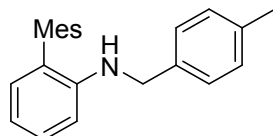

Prepared according to the general procedure on 0.3 mmol scale and obtained an isolated yield of 64% (60 mg) as a white solid.

M. p.: 100-102 °C.

<sup>1</sup>H NMR (400 MHz, CDCl<sub>3</sub>) δ 7.23 – 7.18 (m, 1H), 7.14 (m, 4H), 6.99 (s, 2H), 6.92 (dd, *J* = 7.4, 1.6 Hz, 1H), 6.77 (td, *J* = 7.4, 1.1 Hz, 1H), 6.72 – 6.63 (m, 1H), 4.29 (d, *J* = 5.6 Hz, 2H), 3.81 (br, 1H), 2.35 (s, 3H), 2.33 (s, 3H), 2.05 (s, 6H).

<sup>13</sup>C NMR (101 MHz, CDCl<sub>3</sub>) δ 145.13, 137.46, 137.17, 136.92, 136.61, 134.85, 129.77, 129.30, 128.64, 128.26, 127.03, 126.08, 117.18, 110.47, 47.64, 21.20, 20.32.

HRMS *m/z* (EI-TOF): calculated for C<sub>23</sub>H<sub>25</sub>N [M]<sup>+</sup> 315.1987, found 315.1989.

***N*-(4-Methoxybenzyl)-2',4',6'-trimethyl-[1,1'-biphenyl]-2-amine (2ja)**

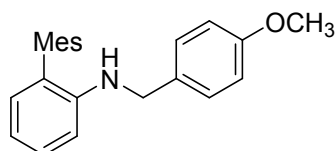

Prepared according to the general procedure on 0.3 mmol scale and obtained an isolated yield of 40% (40 mg) as a white solid.

M. p.: 58-59 °C.

$^1\text{H}$  NMR (400 MHz,  $\text{CDCl}_3$ )  $\delta$  7.23 – 7.13 (m, 3H), 6.97 (s, 2H), 6.90 (dd,  $J$  = 7.4, 1.6 Hz, 1H), 6.87 – 6.79 (m, 2H), 6.76 (td,  $J$  = 7.4, 1.0 Hz, 1H), 6.67 (d,  $J$  = 8.1 Hz, 1H), 4.25 (d,  $J$  = 4.9 Hz, 2H), 3.78 (s, 3H), 3.76 (br, 1H), 2.33 (s, 3H), 2.03 (s, 6H).

$^{13}\text{C}$  NMR (101 MHz,  $\text{CDCl}_3$ )  $\delta$  158.69, 145.09, 137.44, 137.17, 134.82, 131.96, 129.78, 128.63, 128.25, 126.10, 117.20, 114.00, 110.48, 55.38, 47.34, 21.22, 20.32.

HRMS  $m/z$  (EI-TOF): calculated for  $\text{C}_{23}\text{H}_{25}\text{NO}$   $[\text{M}]^+$  331.1936, found 331.1935.

#### 2',4',6'-Trimethyl-*N*-(4-nitrobenzyl)-[1,1'-biphenyl]-2-amine (2ka)

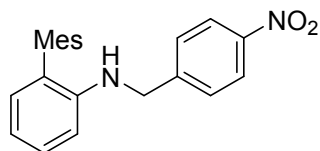

Prepared according to the general procedure on 0.3 mmol scale and obtained an isolated yield of 46% (48 mg) as a yellow solid.

M. p.: 155-156 °C.

$^1\text{H}$  NMR (400 MHz,  $\text{CDCl}_3$ )  $\delta$  8.28 – 8.01 (m, 2H), 7.42 (d,  $J$  = 8.8 Hz, 2H), 7.14 (td,  $J$  = 8.1, 1.6 Hz, 1H), 7.00 (s, 2H), 6.94 (dd,  $J$  = 7.4, 1.6 Hz, 1H), 6.79 (td,  $J$  = 7.4, 1.0 Hz, 1H), 6.55 – 6.38 (m, 1H), 4.42 (d,  $J$  = 5.6 Hz, 2H), 3.97 (br, 1H), 2.34 (s, 3H), 2.04 (s, 6H).

$^{13}\text{C}$  NMR (101 MHz,  $\text{CDCl}_3$ )  $\delta$  148.12, 147.19, 144.21, 137.49, 137.41, 134.48, 130.05, 128.76, 128.33, 127.43, 126.36, 123.98, 118.04, 110.32, 47.33, 21.22, 20.35.

HRMS  $m/z$  (EI-TOF): calculated for  $\text{C}_{22}\text{H}_{22}\text{N}_2\text{O}_2$   $[\text{M}]^+$  346.1681, found 346.1680.

#### *N*,2'-Dimethyl-[1,1'-biphenyl]-2-amine (2f)

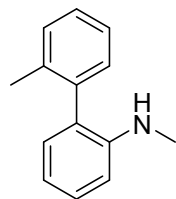

Prepared according to the general procedure on 0.3 mmol scale and obtained an isolated yield of 68% (40 mg) as a light yellow oil.

$^1\text{H}$  NMR (400 MHz,  $\text{CDCl}_3$ )  $\delta$  7.32 – 7.22 (m, 4H), 7.21 – 7.14 (m, 1H), 6.98 (dd,  $J$  = 7.4, 1.6 Hz, 1H), 6.76 (td,  $J$  = 7.4, 1.0 Hz, 1H), 6.68 (d,  $J$  = 8.1 Hz, 1H), 3.42 (br, 1H), 2.77 (s, 3H), 2.12 (s, 3H).

$^{13}\text{C}$  NMR (101 MHz,  $\text{CDCl}_3$ )  $\delta$  146.43, 138.68, 137.39, 130.50, 130.41, 129.70, 128.68, 127.82, 127.32, 126.37, 116.62, 109.56, 30.80, 19.79.

HRMS  $m/z$  (EI-TOF): calculated for  $\text{C}_{14}\text{H}_{15}\text{N}$   $[\text{M}]^+$  197.1204, found 197.1205.

**2'-Fluoro-*N*-methyl-[1,1'-biphenyl]-2-amine (2g)**

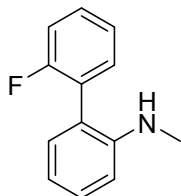

Prepared according to the general procedure on 0.3 mmol scale and obtained an isolated yield of 70% (42 mg) as a white solid.

M. p.: 33-35 °C.

<sup>1</sup>H NMR (400 MHz, CDCl<sub>3</sub>) δ 7.42 – 7.28 (m, 3H), 7.26 – 7.21 (m, 1H), 7.18 (dd, *J* = 9.8, 8.5 Hz, 1H), 7.11 (dd, *J* = 7.4, 1.4 Hz, 1H), 6.80 (td, *J* = 7.4, 0.9 Hz, 1H), 6.74 (d, *J* = 8.2 Hz, 1H), 2.83 (s, 3H).

<sup>13</sup>C NMR (101 MHz, CDCl<sub>3</sub>) δ 160.16 (d, *J*<sub>C-F</sub> = 247.6 Hz), 146.78, 132.37 (d, *J*<sub>C-F</sub> = 3.6 Hz), 130.71, 129.57, 129.55 (d, *J*<sub>C-F</sub> = 7.9 Hz), 126.62 (d, *J*<sub>C-F</sub> = 16.7 Hz), 124.70 (d, *J*<sub>C-F</sub> = 3.7 Hz), 121.28, 116.81, 116.25 (d, *J*<sub>C-F</sub> = 22.4 Hz), 110.13, 30.94.

<sup>19</sup>F NMR (376 MHz, CDCl<sub>3</sub>) δ -114.05.

HRMS *m/z* (EI-TOF): calculated for C<sub>13</sub>H<sub>12</sub>NF [M]<sup>+</sup> 201.0954, found 201.0955.

**2'-Chloro-*N*-methyl-[1,1'-biphenyl]-2-amine (2h)**

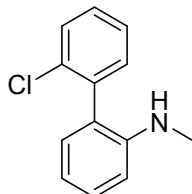

Prepared according to the general procedure on 0.3 mmol scale and obtained an isolated yield of 66% (43 mg) as a colorless oil.

<sup>1</sup>H NMR (400 MHz, CDCl<sub>3</sub>) δ 7.56 – 7.46 (m, 1H), 7.40 – 7.29 (m, 4H), 7.04 (dd, *J* = 7.4, 1.6 Hz, 1H), 6.80 (td, *J* = 7.4, 1.0 Hz, 1H), 6.74 (d, *J* = 8.1 Hz, 1H), 3.47 (br, 1H), 2.82 (s, 3H).

<sup>13</sup>C NMR (101 MHz, CDCl<sub>3</sub>) δ 146.49, 137.98, 134.31, 132.29, 130.07, 129.47, 129.17, 127.41, 125.08, 116.67, 110.01, 30.92.

HRMS *m/z* (EI-TOF): calculated for C<sub>13</sub>H<sub>12</sub>NCl [M]<sup>+</sup> 217.0658, found 217.0659.

**2'-Bromo-*N*-methyl-[1,1'-biphenyl]-2-amine (2i)**

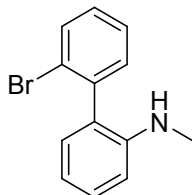

Prepared according to the general procedure on 0.3 mmol scale and obtained an isolated yield of 63% (49 mg) as a light yellow oil.

$^1\text{H}$  NMR (400 MHz,  $\text{CDCl}_3$ )  $\delta$  7.70 (dd,  $J$  = 8.0, 1.1 Hz, 1H), 7.40 (td,  $J$  = 7.5, 1.2 Hz, 1H), 7.36 – 7.29 (m, 2H), 7.29 – 7.15 (m, 1H), 7.01 (dd,  $J$  = 7.4, 1.6 Hz, 1H), 6.79 (td,  $J$  = 7.4, 1.1 Hz, 1H), 6.73 (d,  $J$  = 8.2 Hz, 1H), 3.42 (br, 1H), 2.82 (s, 3H).

$^{13}\text{C}$  NMR (101 MHz,  $\text{CDCl}_3$ )  $\delta$  146.33, 140.08, 133.28, 132.21, 129.92, 129.46, 129.35, 128.05, 126.92, 124.74, 116.66, 110.04, 30.93.

HRMS  $m/z$  (EI-TOF): calculated for  $\text{C}_{13}\text{H}_{12}\text{NBr}$   $[\text{M}]^+$  261.0153, found 261.0152.

#### ***N*-, 2',5'-Trimethyl-[1,1'-biphenyl]-2-amine (2j)**

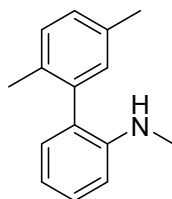

Prepared according to the general procedure on 0.3 mmol scale and obtained an isolated yield of 65% (41 mg) as a colorless oil.

$^1\text{H}$  NMR (400 MHz,  $\text{CDCl}_3$ )  $\delta$  7.32 – 7.23 (m, 1H), 7.19 (d,  $J$  = 7.7 Hz, 1H), 7.10 (d,  $J$  = 7.7 Hz, 1H), 7.02 (s, 1H), 6.99 (d,  $J$  = 7.3 Hz, 1H), 6.76 (t,  $J$  = 7.3 Hz, 1H), 6.69 (d,  $J$  = 8.1 Hz, 1H), 3.46 (br, 1H), 2.79 (s, 3H), 2.35 (s, 3H), 2.09 (s, 3H).

$^{13}\text{C}$  NMR (101 MHz,  $\text{CDCl}_3$ )  $\delta$  146.44, 138.52, 135.81, 134.08, 131.12, 130.28, 129.66, 128.59, 128.51, 127.51, 116.61, 109.52, 30.81, 21.04, 19.26.

HRMS  $m/z$  (EI-TOF): calculated for  $\text{C}_{15}\text{H}_{17}\text{N}$   $[\text{M}]^+$  211.1361, found 211.1362.

#### ***N*-Methyl-2-(naphthalen-1-yl)aniline (2k)**

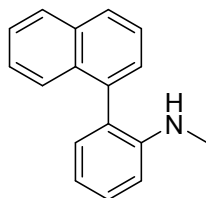

Prepared according to the general procedure on 0.3 mmol scale and obtained an isolated yield of 56% (39 mg) as a colorless oil.

$^1\text{H}$  NMR (400 MHz,  $\text{CDCl}_3$ )  $\delta$  7.91 (t,  $J$  = 8.8 Hz, 2H), 7.62 (d,  $J$  = 8.2 Hz, 1H), 7.56 (dd,  $J$  = 8.2, 7.1 Hz, 1H), 7.51 (ddd,  $J$  = 8.1, 6.9, 1.2 Hz, 1H), 7.47 – 7.34 (m, 3H), 7.14 (dd,  $J$  = 7.4, 1.6 Hz, 1H), 6.85 (td,  $J$  = 7.4, 1.1 Hz, 1H), 6.82 – 6.72 (m, 1H), 3.45 (br, 1H), 2.73 (s, 3H).

$^{13}\text{C}$  NMR (101 MHz,  $\text{CDCl}_3$ )  $\delta$  147.15, 137.04, 133.99, 132.09, 130.91, 129.13, 128.41, 128.13, 127.98, 126.36, 126.21, 126.16, 126.03, 125.75, 116.74, 109.84, 30.82.

HRMS  $m/z$  (EI-TOF): calculated for  $\text{C}_{17}\text{H}_{15}\text{N}$   $[\text{M}]^+$  233.1204, found 233.1203.

#### **2',4',6'-Triisopropyl-*N*-methyl-[1,1'-biphenyl]-2-amine (2l)**

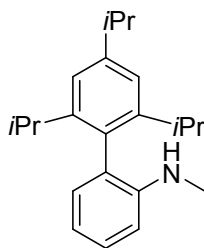

Prepared according to the general procedure on 0.3 mmol scale and obtained an isolated yield of 94% (87 mg) as a white solid.

M. p.: 73-75 °C.

$^1\text{H}$  NMR (400 MHz,  $\text{CDCl}_3$ )  $\delta$  7.29 (td,  $J$  = 8.0, 1.5 Hz, 1H), 7.09 (s, 2H), 6.93 (dd,  $J$  = 7.3, 1.5 Hz, 1H), 6.75 (dd,  $J$  = 10.6, 4.0 Hz, 1H), 6.68 (d,  $J$  = 8.1 Hz, 1H), 3.31 (d,  $J$  = 4.8 Hz, 1H), 2.95 (m, 1H), 2.77 (d,  $J$  = 5.1 Hz, 3H), 2.68 – 2.51 (m, 2H), 1.33 (s, 3H), 1.31 (s, 3H), 1.10 (s, 3H), 1.08 (s, 3H), 1.07 (s, 3H), 1.05 (s, 3H).

$^{13}\text{C}$  NMR (101 MHz,  $\text{CDCl}_3$ )  $\delta$  148.46, 147.91, 147.38, 132.59, 130.36, 128.20, 125.52, 121.28, 116.38, 109.24, 34.39, 30.70, 30.40, 24.77, 24.22, 24.11.

HRMS  $m/z$  (EI-TOF): calculated for  $\text{C}_{22}\text{H}_{31}\text{N}$   $[\text{M}]^+$  309.2457, found 309.2458.

#### 4'-Methoxy-*N*-methyl-[1,1'-biphenyl]-2-amine (2m)

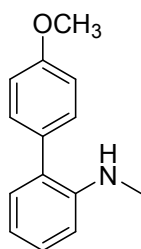

Prepared according to the general procedure on 0.3 mmol scale and obtained an isolated yield of 69% (44 mg) as a colorless oil.

$^1\text{H}$  NMR (400 MHz,  $\text{CDCl}_3$ )  $\delta$  7.38 – 7.31 (m, 2H), 7.31 – 7.22 (m, 1H), 7.08 (dd,  $J$  = 7.4, 1.6 Hz, 1H), 7.02 – 6.93 (m, 2H), 6.77 (td,  $J$  = 7.4, 1.1 Hz, 1H), 6.69 (d,  $J$  = 8.1 Hz, 1H), 3.96 (br, 1H), 3.86 (s, 3H), 2.80 (s, 3H).

$^{13}\text{C}$  NMR (101 MHz,  $\text{CDCl}_3$ )  $\delta$  158.89, 146.52, 131.76, 130.64, 130.19, 128.62, 127.39, 116.89, 114.38, 109.81, 55.45, 30.95.

HRMS  $m/z$  (EI-TOF): calculated for  $\text{C}_{14}\text{H}_{15}\text{NO}$   $[\text{M}]^+$  213.1154, found 213.1155.

#### *N*-Methyl-[1,1'-biphenyl]-2-amine (2n)

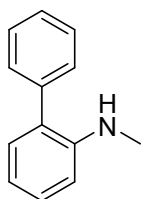

Prepared according to the general procedure on 0.3 mmol scale and obtained an isolated yield of 44% (24 mg) as a colorless oil.

$^1\text{H}$  NMR (400 MHz,  $\text{CDCl}_3$ )  $\delta$  7.50 – 7.41 (m, 4H), 7.39 – 7.33 (m, 1H), 7.29 (td,  $J$  = 8.1, 1.6 Hz, 1H), 7.11 (dd,  $J$  = 7.4, 1.6 Hz, 1H), 6.79 (td,  $J$  = 7.4, 1.0 Hz, 1H), 6.71 (d,  $J$  = 8.1 Hz, 1H), 3.98 (br, 1H), 2.81 (s, 3H).

$^{13}\text{C}$  NMR (101 MHz,  $\text{CDCl}_3$ )  $\delta$  146.30, 139.63, 130.15, 129.54, 128.99, 128.90, 127.70, 127.31, 116.92, 109.92, 30.90.

HRMS  $m/z$  (EI-TOF): calculated for  $\text{C}_{13}\text{H}_{13}\text{N}$   $[\text{M}]^+$  183.1048, found 183.1047.

#### 6-Methyl-6H-dibenzo[c,e][1,2]thiazine 5,5-dioxide (2n')

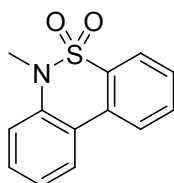

Prepared according to the general procedure on 0.3 mmol scale and obtained an isolated yield of 31% (23 mg) as a brown oil.

$^1\text{H}$  NMR (400 MHz,  $\text{CDCl}_3$ )  $\delta$  8.01 (dd,  $J$  = 7.9, 1.2 Hz, 2H), 7.96 (d,  $J$  = 8.0 Hz, 1H), 7.71 (td,  $J$  = 7.8, 1.4 Hz, 1H), 7.57 (td,  $J$  = 7.7, 1.0 Hz, 1H), 7.54 – 7.46 (m, 1H), 7.38 – 7.28 (m, 2H), 3.45 (s, 3H).

$^{13}\text{C}$  NMR (101 MHz,  $\text{CDCl}_3$ )  $\delta$  139.57, 134.31, 132.56, 132.51, 130.56, 128.35, 125.63, 125.55, 124.80, 124.07, 122.58, 119.51, 32.87.

HRMS  $m/z$  (ESI-TOF): calculated for  $\text{C}_{13}\text{H}_{12}\text{NO}_2\text{S}$   $[\text{M}+\text{H}]^+$  246.0589, found 246.0587.

#### N,4'-Dimethyl-[1,1'-biphenyl]-2-amine (2o)

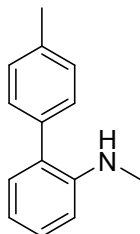

Prepared according to the general procedure on 0.3 mmol scale and obtained an isolated yield of 66% (39 mg) as a light yellow oil.

$^1\text{H}$  NMR (400 MHz,  $\text{CDCl}_3$ )  $\delta$  7.35 – 7.30 (m, 2H), 7.30 – 7.24 (m, 3H), 7.09 (dd,  $J$  = 7.4, 1.6 Hz, 1H), 6.78 (td,  $J$  = 7.4, 1.1 Hz, 1H), 6.70 (d,  $J$  = 8.1 Hz, 1H), 3.99 (br, 1H), 2.80 (s, 3H), 2.41 (s, 3H).

$^{13}\text{C}$  NMR (101 MHz,  $\text{CDCl}_3$ )  $\delta$  146.40, 137.00, 136.58, 130.15, 129.68, 129.39, 128.72, 127.67, 116.89, 109.84, 30.91, 21.32.

HRMS  $m/z$  (EI-TOF): calculated for  $\text{C}_{14}\text{H}_{15}\text{N}$   $[\text{M}]^+$  197.1204, found 197.1205.

#### 2,6-Dimethyl-6H-dibenzo[c,e][1,2]thiazine 5,5-dioxide (2o')

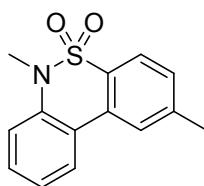

Prepared according to the general procedure on 0.3 mmol scale and obtained an isolated yield of 26% (20 mg) as a white solid.

M. p.: 109-111 °C.

$^1\text{H}$  NMR (400 MHz,  $\text{CDCl}_3$ )  $\delta$  8.00 (dd,  $J$  = 7.9, 1.4 Hz, 1H), 7.89 (d,  $J$  = 8.0 Hz, 1H), 7.76 (s, 1H), 7.49 (td,  $J$  = 8.1, 1.5 Hz, 1H), 7.37 (dd,  $J$  = 8.0, 0.7 Hz, 1H), 7.31 (ddd,  $J$  = 15.6, 7.9, 1.0 Hz, 2H), 3.43 (s, 3H), 2.52 (s, 3H).

$^{13}\text{C}$  NMR (101 MHz,  $\text{CDCl}_3$ )  $\delta$  143.15, 139.73, 132.43, 131.75, 130.41, 129.17, 125.89, 125.57, 124.70, 124.10, 122.64, 119.50, 32.77, 22.07.

HRMS  $m/z$  (ESI-TOF): calculated for  $\text{C}_{14}\text{H}_{13}\text{NO}_2\text{SNa}$   $[\text{M}+\text{Na}]^+$  282.0565, found 282.0566.

#### 4'-(*tert*-Butyl)-*N*-methyl-[1,1'-biphenyl]-2-amine (2p)

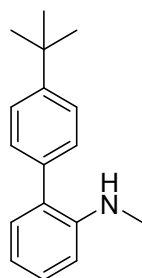

Prepared according to the general procedure on 0.3 mmol scale and obtained an isolated yield of 56% (40 mg) as a colorless oil.

$^1\text{H}$  NMR (400 MHz,  $\text{CDCl}_3$ )  $\delta$  7.48 (d,  $J$  = 7.7 Hz, 2H), 7.37 (d,  $J$  = 7.5 Hz, 2H), 7.27 (dd,  $J$  = 11.7, 3.9 Hz, 1H), 7.12 (d,  $J$  = 7.4 Hz, 1H), 6.79 (t,  $J$  = 7.3 Hz, 1H), 6.71 (d,  $J$  = 8.1 Hz, 1H), 4.04 (br, 1H), 2.81 (s, 3H), 1.39 (s, 9H).

$^{13}\text{C}$  NMR (101 MHz,  $\text{CDCl}_3$ )  $\delta$  150.16, 146.46, 136.56, 130.18, 129.13, 128.69, 127.65, 125.90, 116.88, 109.84, 34.72, 31.52, 30.91.

HRMS  $m/z$  (EI-TOF): calculated for  $\text{C}_{17}\text{H}_{21}\text{N}$   $[\text{M}]^+$  239.1674, found 239.1675.

#### 2-(*tert*-Butyl)-6-methyl-6*H*-dibenzo[*c,e*][1,2]thiazine 5,5-dioxide (2p')

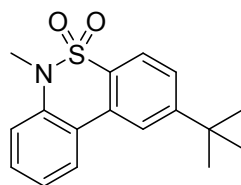

Prepared according to the general procedure on 0.3 mmol scale and obtained an isolated yield of 22% (20 mg) as a colorless oil.

$^1\text{H}$  NMR (400 MHz,  $\text{CDCl}_3$ )  $\delta$  8.04 (d,  $J$  = 7.9 Hz, 1H), 7.96 (s, 1H), 7.93 (d,  $J$  = 8.5 Hz, 1H), 7.61 (d,  $J$  = 8.3 Hz, 1H), 7.50 (t,  $J$  = 7.8 Hz, 1H), 7.35 (d,  $J$  = 7.6 Hz, 1H), 7.30 (d,  $J$  = 8.1 Hz, 1H), 3.44 (s, 3H), 1.41 (s, 9H).

$^{13}\text{C}$  NMR (101 MHz,  $\text{CDCl}_3$ )  $\delta$  156.22, 139.74, 132.13, 131.75, 130.37, 125.81, 125.55, 124.71, 124.50, 122.46, 122.34, 119.51, 35.58, 32.77, 31.32.

HRMS  $m/z$  (ESI-TOF): calculated for  $\text{C}_{17}\text{H}_{20}\text{NO}_2\text{S}$   $[\text{M}+\text{H}]^+$  302.1215, found 302.1217.

#### *N*-Methyl-[1,1':4',1''-terphenyl]-2-amine (2q)

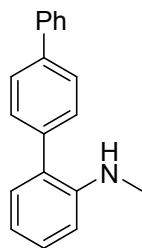

Prepared according to the general procedure on 0.3 mmol scale and obtained an isolated yield of 52% (40 mg) as a colorless oil.

$^1\text{H}$  NMR (400 MHz,  $\text{CDCl}_3$ )  $\delta$  7.69 (m, 4H), 7.51 (m, 4H), 7.40 (t,  $J$  = 7.3 Hz, 1H), 7.32 (t,  $J$  = 7.7 Hz, 1H), 7.17 (d,  $J$  = 7.3 Hz, 1H), 6.83 (t,  $J$  = 7.3 Hz, 1H), 6.75 (d,  $J$  = 8.1 Hz, 1H), 4.06 (br, 1H), 2.85 (s, 3H).

$^{13}\text{C}$  NMR (101 MHz,  $\text{CDCl}_3$ )  $\delta$  146.38, 140.86, 140.15, 138.60, 130.15, 129.93, 128.97, 127.70, 127.50, 127.26, 127.18, 117.00, 109.99, 30.92.

HRMS  $m/z$  (EI-TOF): calculated for  $\text{C}_{19}\text{H}_{17}\text{N}$   $[\text{M}]^+$  259.1361, found 259.1360.

#### 6-Methyl-2-phenyl-6H-dibenzo[c,e][1,2]thiazine 5,5-dioxide (2q')

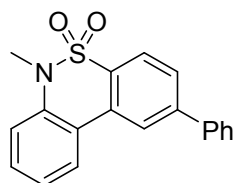

Prepared according to the general procedure on 0.3 mmol scale and obtained an isolated yield of 19% (18 mg) as a white solid.

M. p.: 165-167 °C.

$^1\text{H}$  NMR (400 MHz,  $\text{CDCl}_3$ )  $\delta$  8.13 (s, 1H), 8.08 (t,  $J$  = 8.9 Hz, 2H), 7.77 (d,  $J$  = 8.1 Hz, 1H), 7.66 (d,  $J$  = 7.6 Hz, 2H), 7.51 (m, 3H), 7.48 – 7.41 (m, 1H), 7.35 (dd,  $J$  = 13.0, 7.7 Hz, 2H), 3.47 (s, 3H).

$^{13}\text{C}$  NMR (101 MHz,  $\text{CDCl}_3$ )  $\delta$  145.78, 139.85, 139.81, 133.01, 132.95, 130.68, 129.25, 128.67, 127.61, 127.23, 125.69, 124.85, 124.32, 124.19, 123.21, 119.62, 32.91.

HRMS  $m/z$  (ESI-TOF): calculated for  $\text{C}_{19}\text{H}_{16}\text{NO}_2\text{S}$   $[\text{M}+\text{H}]^+$  322.0902, found 322.0903.

#### N-Methyl-4'-(trifluoromethyl)-[1,1'-biphenyl]-2-amine (2r)

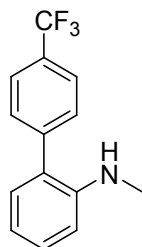

Prepared according to the general procedure on 0.3 mmol scale and obtained an isolated yield of 45% (34 mg) as a colorless oil.

$^1\text{H}$  NMR (400 MHz,  $\text{CDCl}_3$ )  $\delta$  7.71 (d,  $J$  = 8.0 Hz, 2H), 7.57 (d,  $J$  = 8.0 Hz, 2H), 7.35 – 7.29 (m, 1H), 7.09 (dd,  $J$  = 7.4, 1.6 Hz, 1H), 6.81 (td,  $J$  = 7.4, 1.0 Hz, 1H), 6.73 (d,  $J$  = 8.2 Hz, 1H), 3.86 (br, 1H), 2.82 (s, 3H).

$^{13}\text{C}$  NMR (101 MHz,  $\text{CDCl}_3$ )  $\delta$  146.10, 143.51, 130.10, 129.94, 129.63, 129.47 (q,  $J_{\text{C-F}} = 32.6$  Hz), 126.15, 125.95 (q,  $J_{\text{C-F}} = 3.7$  Hz), 124.35 (q,  $J_{\text{C-F}} = 273.1$  Hz), 117.16, 110.24, 30.84.  
 $^{19}\text{F}$  NMR (376 MHz,  $\text{CDCl}_3$ )  $\delta$  -62.47.  
HRMS  $m/z$  (EI-TOF): calculated for  $\text{C}_{14}\text{H}_{12}\text{NF}_3$   $[\text{M}]^+$  251.0922, found 251.0923.

**6-Methyl-2-(trifluoromethyl)-6H-dibenzo[c,e][1,2]thiazine 5,5-dioxide (2r')**

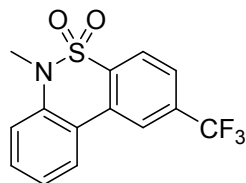

Prepared according to the general procedure on 0.3 mmol scale and obtained an isolated yield of 21% (20 mg) as a brown oil.

$^1\text{H}$  NMR (400 MHz,  $\text{CDCl}_3$ )  $\delta$  8.22 (s, 1H), 8.13 (d,  $J = 8.2$  Hz, 1H), 8.06 (dd,  $J = 7.9, 1.4$  Hz, 1H), 7.82 (dd,  $J = 8.2, 0.9$  Hz, 1H), 7.57 (td,  $J = 8.2, 1.4$  Hz, 1H), 7.39 (td,  $J = 7.9, 1.1$  Hz, 1H), 7.35 (dd,  $J = 8.2, 0.8$  Hz, 1H), 3.48 (s, 3H).

$^{13}\text{C}$  NMR (101 MHz,  $\text{CDCl}_3$ )  $\delta$  139.67, 136.97, 134.46 (q,  $J_{\text{C-F}} = 33.1$  Hz), 133.44, 131.52, 125.82, 125.19, 124.97 (q,  $J_{\text{C-F}} = 3.6$  Hz), 123.57, 123.42 (q,  $J_{\text{C-F}} = 274.2$  Hz), 123.25, 122.85 (q,  $J_{\text{C-F}} = 3.8$  Hz), 119.75, 33.13.

$^{19}\text{F}$  NMR (376 MHz,  $\text{CDCl}_3$ )  $\delta$  -62.96.

HRMS  $m/z$  (ESI-TOF): calculated for  $\text{C}_{14}\text{H}_{11}\text{NO}_2\text{SF}_3$   $[\text{M}+\text{H}]^+$  314.0463, found 314.0465.

**N-Methyl-4'-nitro-[1,1'-biphenyl]-2-amine (2s)**

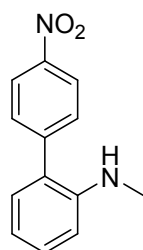

Prepared according to the general procedure on 0.3 mmol scale and obtained an isolated yield of 64% (44 mg) as a yellow solid.

M. p.: 153-155  $^{\circ}\text{C}$ .

$^1\text{H}$  NMR (400 MHz,  $\text{CDCl}_3$ )  $\delta$  8.36 – 8.21 (m, 2H), 7.70 – 7.53 (m, 2H), 7.33 (td,  $J = 8.3, 1.6$  Hz, 1H), 7.09 (dd,  $J = 7.5, 1.5$  Hz, 1H), 6.82 (td,  $J = 7.4, 0.9$  Hz, 1H), 6.73 (d,  $J = 8.2$  Hz, 1H), 3.85 (br, 1H), 2.82 (s, 3H).

$^{13}\text{C}$  NMR (101 MHz,  $\text{CDCl}_3$ )  $\delta$  146.99, 146.86, 145.95, 130.39, 130.21, 130.10, 125.17, 124.29, 117.37, 110.52, 30.85.

HRMS  $m/z$  (EI-TOF): calculated for  $\text{C}_{13}\text{H}_{12}\text{N}_2\text{O}_2$   $[\text{M}]^+$  228.0899, found 228.0900.

**6-Methyl-2-nitro-6H-dibenzo[c,e][1,2]thiazine 5,5-dioxide (2s')**

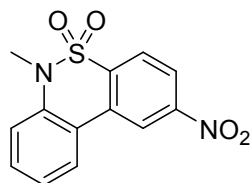

Prepared according to the general procedure on 0.3 mmol scale and obtained an isolated yield of 9% (8 mg) as a yellow solid.

M. p.: 160-162 °C.

$^1\text{H}$  NMR (400 MHz,  $\text{CDCl}_3$ )  $\delta$  8.84 (d,  $J$  = 2.1 Hz, 1H), 8.40 (dd,  $J$  = 8.6, 2.1 Hz, 1H), 8.18 (d,  $J$  = 8.6 Hz, 1H), 8.12 (dd,  $J$  = 8.0, 1.4 Hz, 1H), 7.67 – 7.56 (m, 1H), 7.44 (td,  $J$  = 7.9, 1.1 Hz, 1H), 7.38 (dd,  $J$  = 8.2, 0.9 Hz, 1H), 3.50 (s, 3H).

$^{13}\text{C}$  NMR (101 MHz,  $\text{CDCl}_3$ )  $\delta$  150.17, 139.69, 138.58, 134.41, 132.05, 126.05, 125.42, 124.42, 122.90, 122.81, 121.06, 119.79, 33.26.

HRMS  $m/z$  (EI-TOF): calculated for  $\text{C}_{13}\text{H}_{10}\text{N}_2\text{O}_4\text{S}$   $[\text{M}]^+$  290.0361, found 290.0360.

## Part 5. Radical Trapping Experiments, EPR Experiments and Deuteration Experiment.

### Radical trapping experiment:

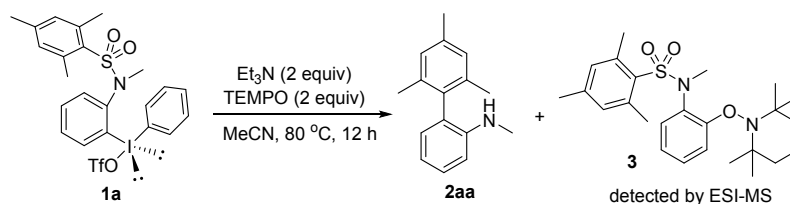

To a Schlenk tube was added iodonium salts **1a** (0.3 mmol, 1 equiv.) and TEMPO (0.6 mmol, 2.0 equiv.). The tube was degassed with argon for three times. Acetonitrile (5 mL) and Et<sub>3</sub>N (2 equiv) was added via syringe, and the mixture was stirred at 80 °C in an oil bath for 12 h. After cooling to room temperature, a drop of the reaction mixture was delivered to ESI-MS analysis, and the remaining solvent was evaporated under vacuum. The crude products were purified using flash column chromatography on silica gel to afford the desired products **2aa** (37%).

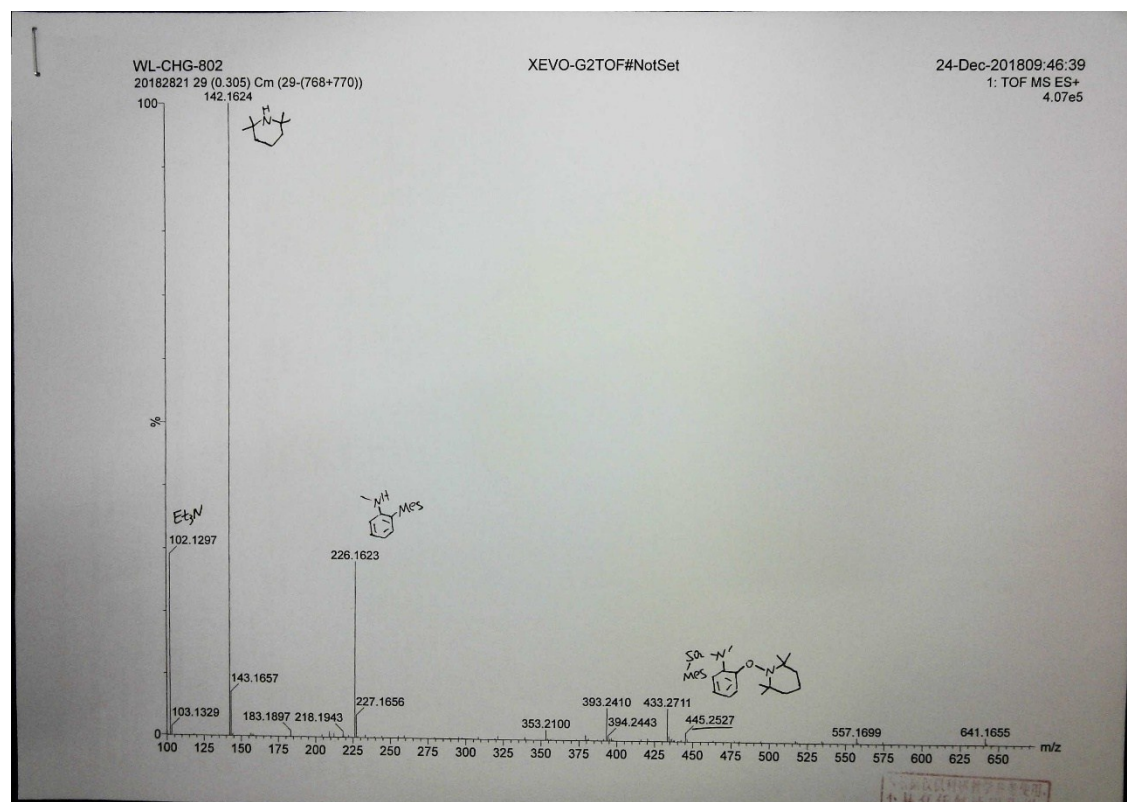

**Figure 1.** ESI-MS spectra of crude reaction mixture.

**EPR experiment:**

**Line 1a:** A 25 mL Schlenk tube equipped magnetic stir bar was charged with **1a** (0.1 mmol, 1.0 equiv), Et<sub>3</sub>N (0.2 mmol, 2.0 equiv), PBN (0.2 mmol, 2.0 equiv), and MeCN (5 mL). EPR spectrum was recorded by Bruker EMX-8/2.7 EPR spectrometer immediately.

**Line 1b:** A 25 mL Schlenk tube equipped magnetic stir bar was charged with **1b** (0.1 mmol, 1.0 equiv), Et<sub>3</sub>N (0.2 mmol, 2.0 equiv), PBN (0.2 mmol, 2.0 equiv), and MeCN (5 mL). EPR spectrum was recorded by Bruker EMX-8/2.7 EPR spectrometer immediately.

**Line 1c:** A 25 mL Schlenk tube equipped magnetic stir bar was charged with **1c** (0.1 mmol, 1.0 equiv), Et<sub>3</sub>N (0.2 mmol, 2.0 equiv), PBN (0.2 mmol, 2.0 equiv), and MeCN (5 mL). EPR spectrum was recorded by Bruker EMX-8/2.7 EPR spectrometer immediately.

**Line 1d:** A 25 mL Schlenk tube equipped magnetic stir bar was charged with **1d** (0.1 mmol, 1.0 equiv), Et<sub>3</sub>N (0.2 mmol, 2.0 equiv), PBN (0.2 mmol, 2.0 equiv), and MeCN (5 mL). EPR spectrum was recorded by Bruker EMX-8/2.7 EPR spectrometer immediately.

**Line 1e:** A 25 mL Schlenk tube equipped magnetic stir bar was charged with **1e** (0.1 mmol, 1.0 equiv), Et<sub>3</sub>N (0.2 mmol, 2.0 equiv), PBN (0.2 mmol, 2.0 equiv), and MeCN (5 mL). EPR spectrum was recorded by Bruker EMX-8/2.7 EPR spectrometer immediately.

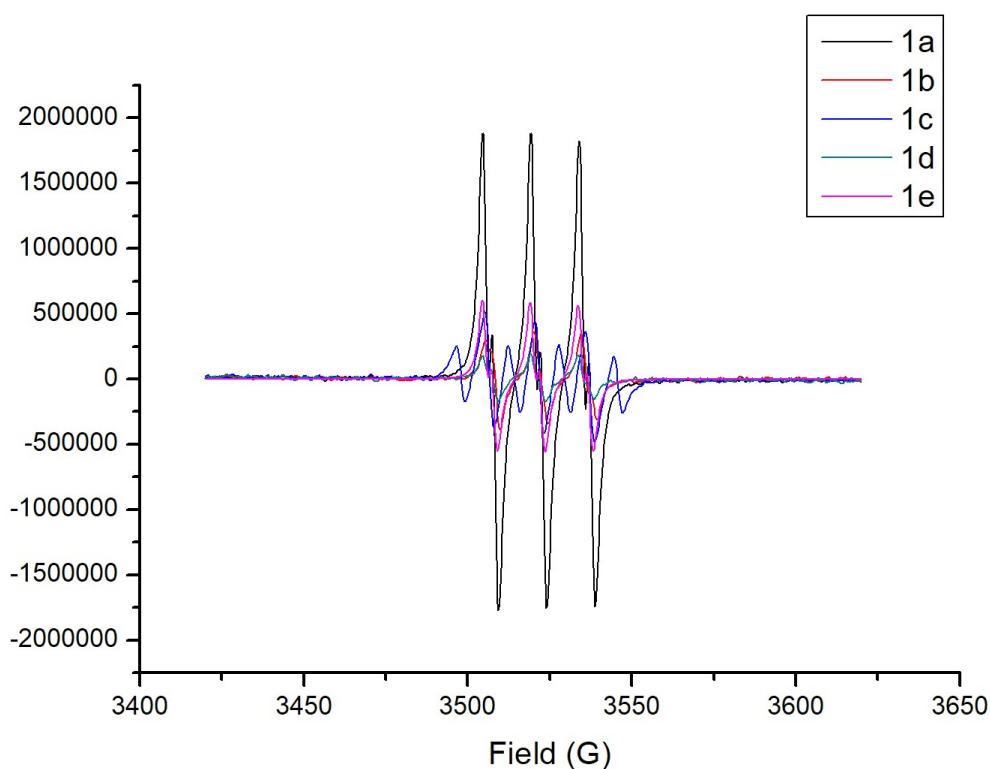

**Figure 2.** EPR Spectra of spin adducts generated in MeCN (5 mL) in the presence of iodonium salts **1** (0.1 mmol), Et<sub>3</sub>N (0.2 mmol), and PBN (0.2 mmol) at room temperature. PBN =  $\alpha$ -phenyl-*N-tert*-butylnitrone.

Note: the multiple peaks in the case of **1c** may be ascribed to the existence of a considerable amount of stable 2,4,6-trimethoxyphenyl radicals.

#### Deuteration experiment:

To a Schlenk tube was added iodonium salts **1a** (0.3 mmol, 1 equiv.) and the tube was degassed with argon for three times. MeCN-*d*<sub>3</sub> (5 mL) and Et<sub>3</sub>N (2 equiv) was added via syringe, and the mixture was stirred at 80 °C in

an oil bath for 12 h. After cooling to room temperature, the crude reaction mixture was directly delivered to  $^1\text{H}$  NMR.

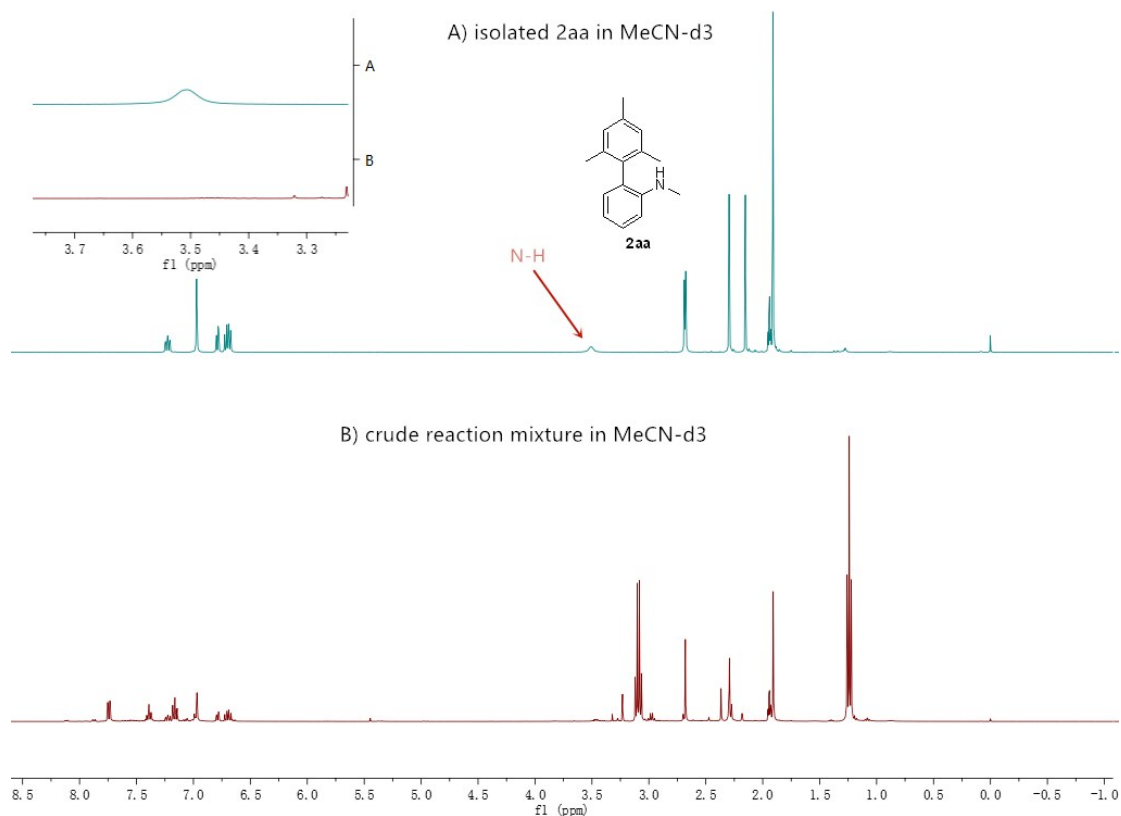

**Figure 3.**  $^1\text{H}$ -NMR spectra of isolated product and crude reaction mixture .

## Part 6. Derivatization of Products

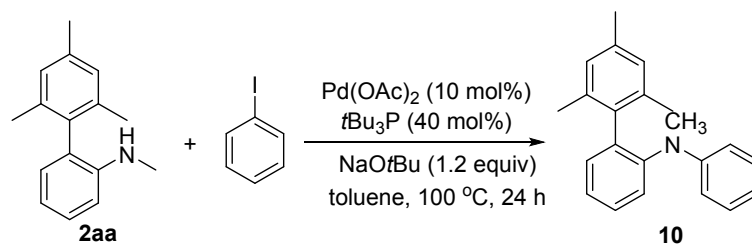

Following the modified procedure described by Bushby et al.<sup>5</sup> An oven-dried screw cap test tube was charged with a magnetic stir bar, Pd(OAc)<sub>2</sub> (11 mg, 0.1 equiv.), NaOtBu (1.2 equiv.), and **2aa** (0.5 mmol, 1.0 equiv.). The tube was then evacuated and back-filled with argon. The evacuation/backfill sequence was repeated two additional times. Anhydrous toluene (2 mL) was added volumetrically followed by iodobenzene (2.0 equiv.) and tri-*tert*-butylphosphine (1M in toluene, 0.2 mL, 0.4 equiv.). The contents were heated at 100 °C for 24 h. The contents were allowed to cool and were treated with dilute (2 M) ammonium chloride and washed with a saturated solution of brine. The organic layer was separated and the aqueous extracted with ethyl acetate (3 x 25 mL). The organics were combined and dried with MgSO<sub>4</sub>, and the solvent was removed under reduced pressure. The crude product was purified by column chromatography on silica gel. White solid, 105 mg, 70%. M. p.: 62-63 °C.

<sup>1</sup>H NMR (400 MHz, CDCl<sub>3</sub>) δ 7.37 (dd, *J* = 8.0, 1.2 Hz, 1H), 7.33 – 7.27 (m, 1H), 7.23 (td, *J* = 7.3, 1.4 Hz, 1H), 7.15 (ddd, *J* = 13.7, 7.0, 1.8 Hz, 3H), 6.87 (s, 2H), 6.80 (d, *J* = 7.9 Hz, 2H), 6.74 (t, *J* = 7.3 Hz, 1H), 2.75 (s, 3H), 2.29 (s, 3H), 2.02 (s, 6H).

<sup>13</sup>C NMR (101 MHz, CDCl<sub>3</sub>) δ 148.86, 147.55, 137.67, 136.68, 136.48, 136.43, 132.67, 128.70, 128.38, 127.98, 127.45, 125.09, 118.05, 115.02, 38.74, 21.15, 20.98.

HRMS *m/z* (EI-TOF): calculated for C<sub>22</sub>H<sub>23</sub>N [M]<sup>+</sup> 301.1830, found 301.1832.

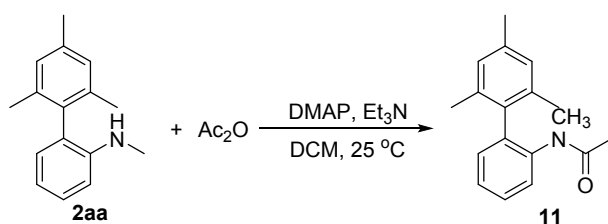

Amine **2aa** (0.5 mmol, 1.0 equiv) was dissolved in dichloromethane (5 mL) at 25 °C, followed by the addition of DMAP (0.2 equiv.) and Et<sub>3</sub>N (1.5 equiv.). Ac<sub>2</sub>O (1.5 equiv.) was added dropwise and the mixture was stirred for 24 h. The reaction was quenched with dilute hydrochloric acid (2M, 50 mL) and the mixture was extracted with CH<sub>2</sub>Cl<sub>2</sub> for 3 times. The combined organic extracts were dried with Na<sub>2</sub>SO<sub>4</sub>, filtered, and the solvent was removed by rotary evaporation. Purification of the crude product by flash chromatography on silica gel afforded the *N*-acetyl amide **11** as a white solid (132 mg, 99% yield).

M. p.: 111-112 °C.

<sup>1</sup>H NMR (400 MHz, CDCl<sub>3</sub>) δ 7.43 – 7.32 (m, 2H), 7.24 – 7.12 (m, 2H), 6.91 (d, *J* = 6.7 Hz, 2H), 2.83 (s, 0.29H), 2.75 (s, 2.75H), 2.32 (s, 0.37H), 2.30 (s, 2.58H), 2.06 (s, 0.30H), 2.01 (s, 2.67H), 1.99 (s, 0.71H), 1.97 (s, 5.32H).

<sup>13</sup>C NMR (101 MHz, CDCl<sub>3</sub>) δ 170.73, 142.60, 138.31, 137.40, 135.90, 135.86, 135.03, 132.37, 128.86, 128.65, 128.58, 128.18, 127.85, 35.32, 22.59, 21.08, 20.44.

Note: two rotamers are visible due to restricted rotation of the amide bond.

HRMS m/z (EI-TOF): calculated for C<sub>18</sub>H<sub>21</sub>NO [M]<sup>+</sup> 267.1623, found 267.1625.

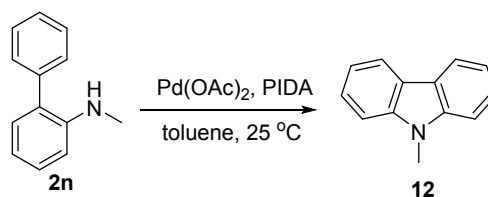

Following the modified procedure described by Gaunt et al.<sup>6</sup> The biarylamine **2n** (0.5 mmol, 1.0 equiv) and Pd(OAc)<sub>2</sub> (10 mol%) were stirred in toluene (5 mL) under Ar atmosphere at 25 °C for 1 h. Phenyliodonium diacetate (PIDA, 1.2 equiv) was then added and the reaction mixture was stirred at 25 °C for 24 h. The solvent was removed under reduced pressure and the crude product was purified by column chromatography on silica gel. White solid, 64 mg, 71%. Spectral data is consistent with that of previously reported.<sup>6</sup>

<sup>1</sup>H NMR (400 MHz, CDCl<sub>3</sub>) δ 8.13 (d, *J* = 7.8 Hz, 2H), 7.50 (ddd, *J* = 8.2, 7.1, 1.1 Hz, 2H), 7.42 (d, *J* = 8.2 Hz, 2H), 7.26 (td, *J* = 7.8, 0.9 Hz, 2H), 3.86 (s, 3H).

<sup>13</sup>C NMR (101 MHz, CDCl<sub>3</sub>) δ 141.11, 125.79, 122.89, 120.42, 118.95, 108.54, 29.16.

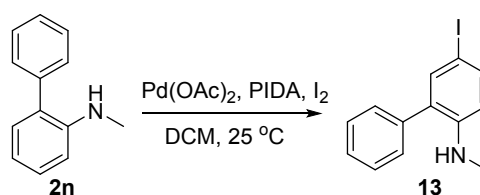

The biarylamine **2n** (0.5 mmol, 1.0 equiv), Pd(OAc)<sub>2</sub> (10 mol%), PIDA (1.0 equiv), and I<sub>2</sub> (1.0 equiv) were stirred in DCM (5 mL) under air atmosphere at 25 °C for 24 h. The solvent was removed under reduced pressure and the crude product was purified by column chromatography on silica gel. Light yellow oil, 100 mg, 65%.

<sup>1</sup>H NMR (400 MHz, CDCl<sub>3</sub>) δ 7.52 (dd, *J* = 8.6, 2.2 Hz, 1H), 7.45 (dd, *J* = 10.4, 4.3 Hz, 2H), 7.36 (ddd, *J* = 6.6, 4.6, 2.0 Hz, 4H), 6.45 (d, *J* = 8.6 Hz, 1H), 3.99 (br, 1H), 2.77 (s, 3H).

<sup>13</sup>C NMR (101 MHz, CDCl<sub>3</sub>) δ 145.97, 138.09, 138.03, 137.32, 130.03, 129.32, 129.14, 127.81, 112.09, 77.61, 30.71.

HRMS m/z (EI-TOF): calculated for C<sub>13</sub>H<sub>12</sub>I<sub>N</sub> [M]<sup>+</sup> 309.0014, found 309.0013.

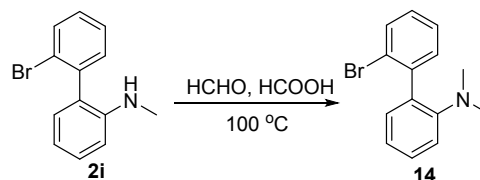

HCOOH (2.5 mL) was added to a stirred solution of **2i** (0.5 mmol) in HCHO (37%, 1.75 mL), and the mixture was kept at reflux overnight, cooled, neutralized with a saturated solution of NaHCO<sub>3</sub>, and extracted with EtOAc. The combined organic extracts were dried with Na<sub>2</sub>SO<sub>4</sub>, filtered, and the solvent was removed by rotary evaporation. Purification of the crude product by flash chromatography on silica gel afforded **14** as a white solid (125 mg, 91% yield).

M. p.: 59-61 °C.

<sup>1</sup>H NMR (400 MHz, CDCl<sub>3</sub>) δ 7.67 (d, *J* = 7.9 Hz, 1H), 7.40 – 7.29 (m, 3H), 7.21 – 7.11 (m, 2H), 7.07 (d, *J* = 8.1 Hz, 1H), 7.02 (t, *J* = 7.4 Hz, 1H), 2.54 (s, 6H).

<sup>13</sup>C NMR (101 MHz, CDCl<sub>3</sub>) δ 151.62, 142.66, 133.84, 133.09, 132.02, 131.96, 128.84, 128.30, 127.28, 124.03, 121.00, 118.02, 43.35.

HRMS *m/z* (EI-TOF): calculated for C<sub>14</sub>H<sub>14</sub>BrN [M]<sup>+</sup> 275.0310, found 275.0310.

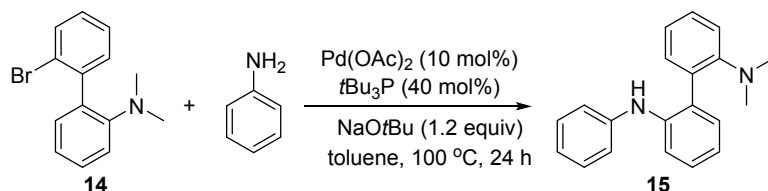

An oven-dried screw cap test tube was charged with a magnetic stir bar, Pd(OAc)<sub>2</sub> (11 mg, 0.1 equiv.), NaOtBu (1.2 equiv.), and **14** (0.5 mmol, 1.0 equiv.). The tube was then evacuated and back-filled with argon. The evacuation/backfill sequence was repeated two additional times. Anhydrous toluene (2 mL) was added volumetrically followed by aniline (5.0 equiv.) and tri-*tert*-butylphosphine (1M in toluene, 0.2 mL, 0.4 equiv.). The contents were heated at 100 °C for 24 h. The contents were allowed to cool and were treated with dilute (2 M) ammonium chloride and washed with a saturated solution of brine. The organic layer was separated and the aqueous extracted with ethyl acetate (3 x 25 mL). The organics were combined and dried with MgSO<sub>4</sub>, and the solvent was removed under reduced pressure. The crude product was purified by column chromatography on silica gel. White solid, 130 mg, 90%.

M. p.: 106-108 °C.

<sup>1</sup>H NMR (400 MHz, CDCl<sub>3</sub>) δ 7.64 (br, 1H), 7.44 (dd, *J* = 8.1, 0.8 Hz, 1H), 7.34 – 7.25 (m, 3H), 7.25 – 7.19 (m, 1H), 7.19 – 7.11 (m, 2H), 7.10 – 7.00 (m, 2H), 6.98 (td, *J* = 7.5, 1.1 Hz, 1H), 6.90 (dd, *J* = 8.5, 0.9 Hz, 2H), 6.77 (t, *J* = 7.3 Hz, 1H), 2.65 (s, 6H).

<sup>13</sup>C NMR (101 MHz, CDCl<sub>3</sub>) δ 150.58, 144.11, 141.04, 133.95, 133.48, 132.66, 131.70, 129.28, 128.43, 127.85, 122.51, 121.30, 119.76, 117.54, 117.46, 117.32, 43.30, 43.26.

HRMS *m/z* (EI-TOF): calculated for C<sub>20</sub>H<sub>20</sub>N<sub>2</sub> [M]<sup>+</sup> 288.1626, found 288.1625.

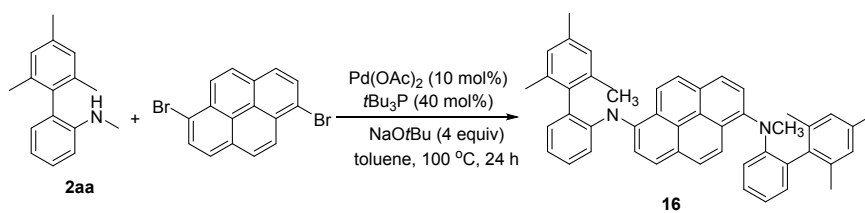

Following the modified procedure described by Bushby et al.<sup>5</sup> An oven-dried screw cap test tube was charged with a magnetic stir bar, Pd(OAc)<sub>2</sub> (11 mg, 0.1 equiv.), NaOtBu (4 equiv.), **2aa** (2 equiv.), and 1,6-dibromopyrene (0.5 mmol, 1.0 equiv.). The tube was then evacuated and back-filled with argon. The evacuation/backfill sequence was repeated two additional times. Anhydrous toluene (2 mL) was added volumetrically followed by tri-*tert*-butylphosphine (1M in toluene, 0.2 mL, 0.4 equiv.). The contents were heated at 100 °C for 24 h. The contents were allowed to cool and were treated with dilute (2 M) ammonium chloride and washed with a saturated solution of brine. The organic layer was separated and the aqueous extracted with ethyl acetate (3 x 25 mL). The organics were combined and dried with MgSO<sub>4</sub>, and the solvent was removed under reduced

pressure. The crude product was purified by column chromatography on silica gel. Green solid, 260 mg, 80%.  
M. p.: 278-280 °C.

$^1\text{H}$  NMR (400 MHz,  $\text{CDCl}_3$ )  $\delta$  7.77 (d,  $J$  = 9.1 Hz, 2H), 7.72 (d,  $J$  = 8.1 Hz, 2H), 7.59 (d,  $J$  = 9.2 Hz, 2H), 7.54 (d,  $J$  = 7.7 Hz, 2H), 7.51 – 7.43 (m, 2H), 7.33 (d,  $J$  = 8.1 Hz, 2H), 7.13 (t,  $J$  = 6.9 Hz, 2H), 6.98 (dd,  $J$  = 7.4, 1.4 Hz, 2H), 6.21 (s, 4H), 3.34 (s, 6H), 1.69 (s, 6H), 1.63 (s, 12H).

$^{13}\text{C}$  NMR (101 MHz,  $\text{CDCl}_3$ )  $\delta$  150.31, 145.74, 136.87, 135.94, 135.54, 135.21, 131.85, 128.37, 127.79, 127.63, 127.20, 126.10, 125.33, 124.45, 124.26, 122.39, 122.11, 119.95, 43.75, 20.62, 20.31.

HRMS  $m/z$  (EI-TOF): calculated for  $\text{C}_{48}\text{H}_{44}\text{N}_2$   $[\text{M}]^+$  648.3504, found 648.3503.

## Part 7. References

- [1] A. Polley, G. Bairy, P. Das, R. Jana, *Adv. Synth. Catal.* **2018**, 360, 4161.
- [2] X. Geng, S. Mao, L. Chen, J. Yu, J. Han, J. Hua, L. Wang, *Tetrahedron Letters* **2014**, 55, 3856.
- [3] S. W. Youn, T. Y. Ko, Y. H. Jang, *Angew. Chem. Int. Ed.* **2017**, 56, 6636.
- [4] L. Qin, B. Hu, K. D. Neumann, E. J. Linstad, K. McCauley, J. Veness, J. J. Kempinger, S. G. DiMagno, *Eur. J. Org. Chem.* **2015**, 5919.
- [5] R. J. Bushby, C. A. Kilner, N. Taylor, M. E. Vale, *Tetrahedron* **2007**, 63, 11458.
- [6] J. A. Jordan-Hore, C. C. C. Johansson, M. Gulias, E. M. Beck, M. J. Gaunt, *J. Am. Chem. Soc.* **2008**, 130, 16184.

## Part 8. $^1\text{H}$ , $^{13}\text{C}$ , and $^{19}\text{F}$ NMR spectra of Products

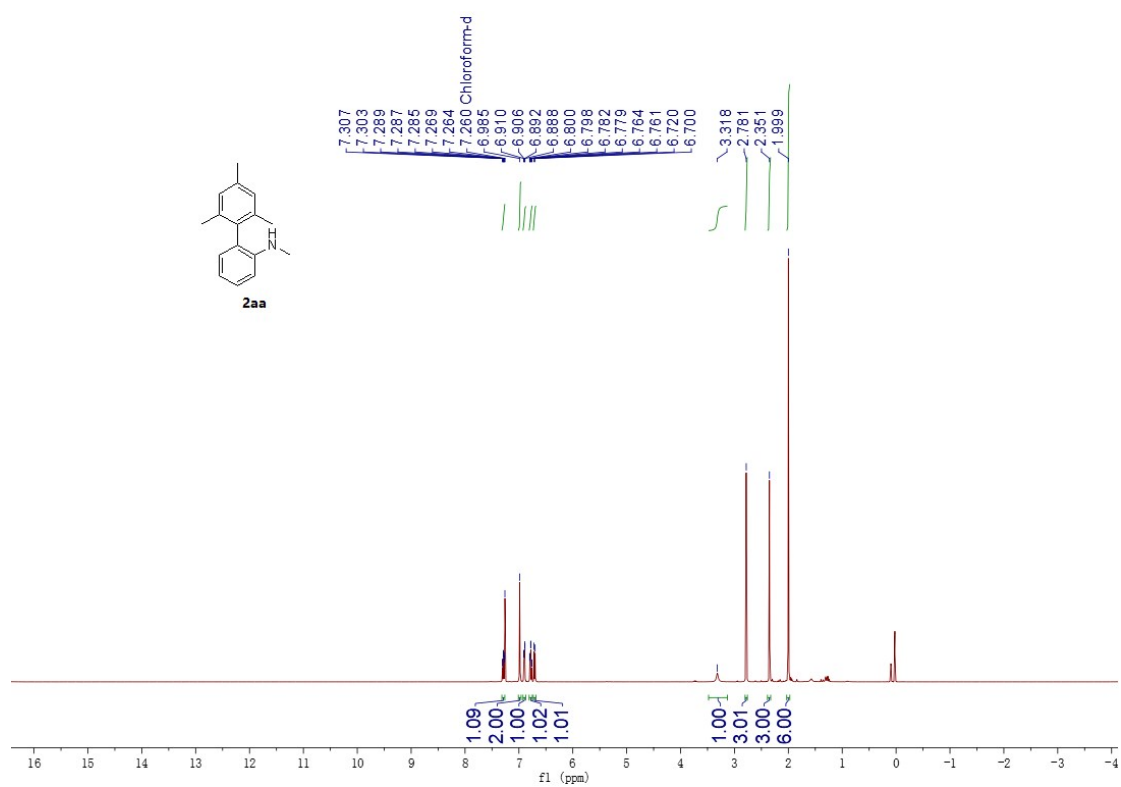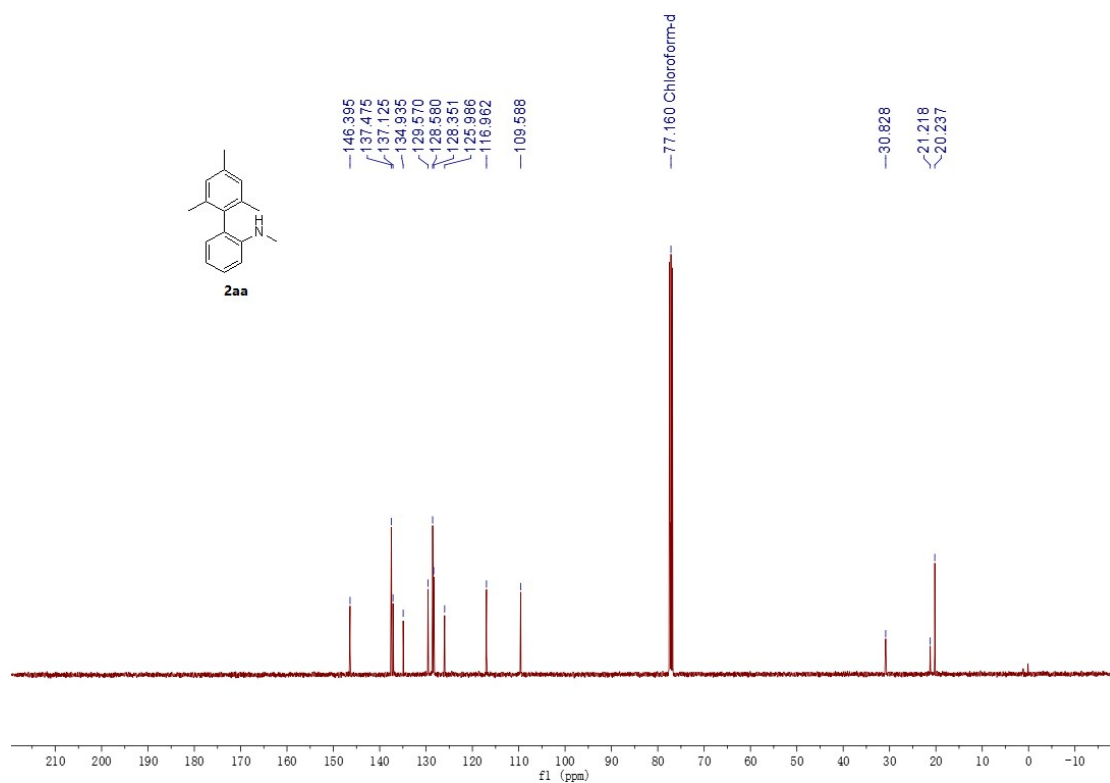

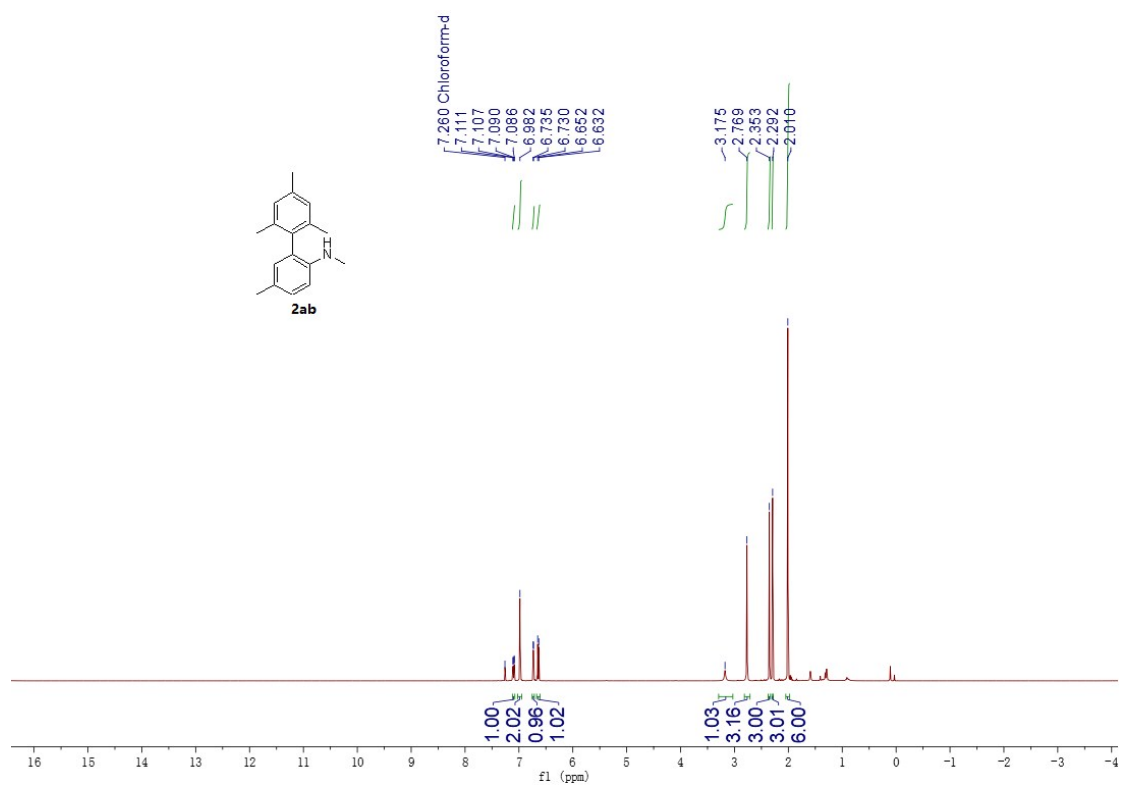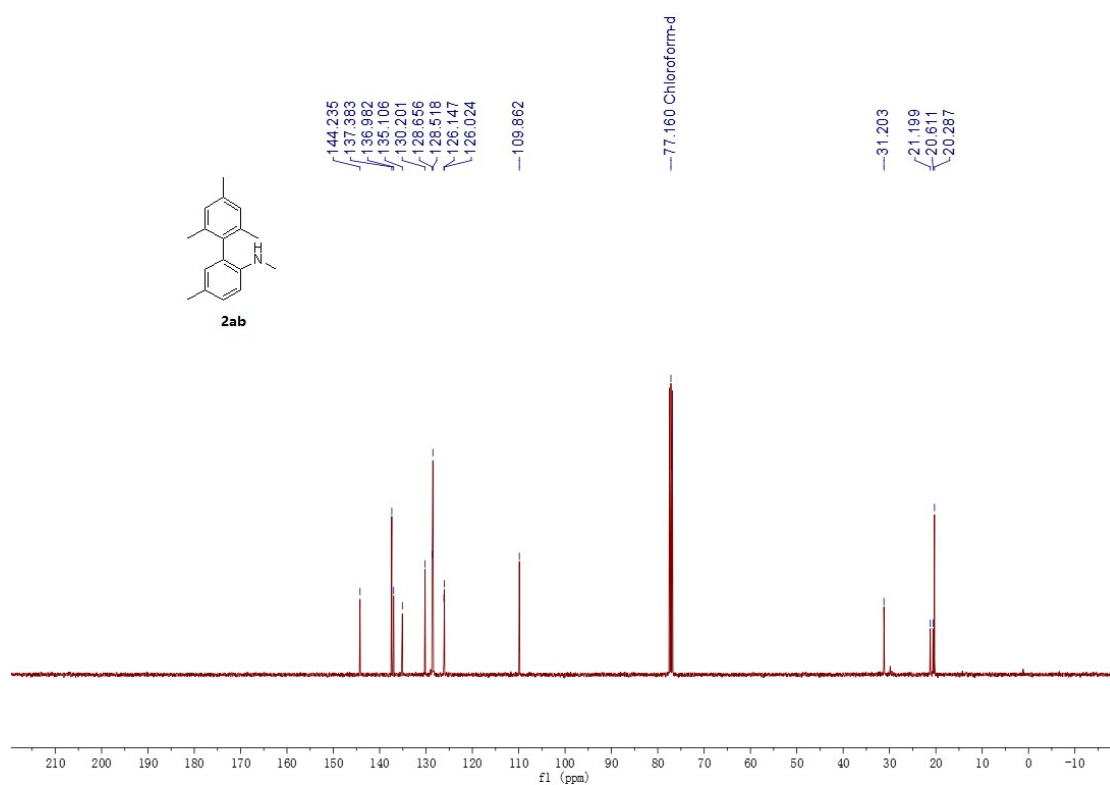

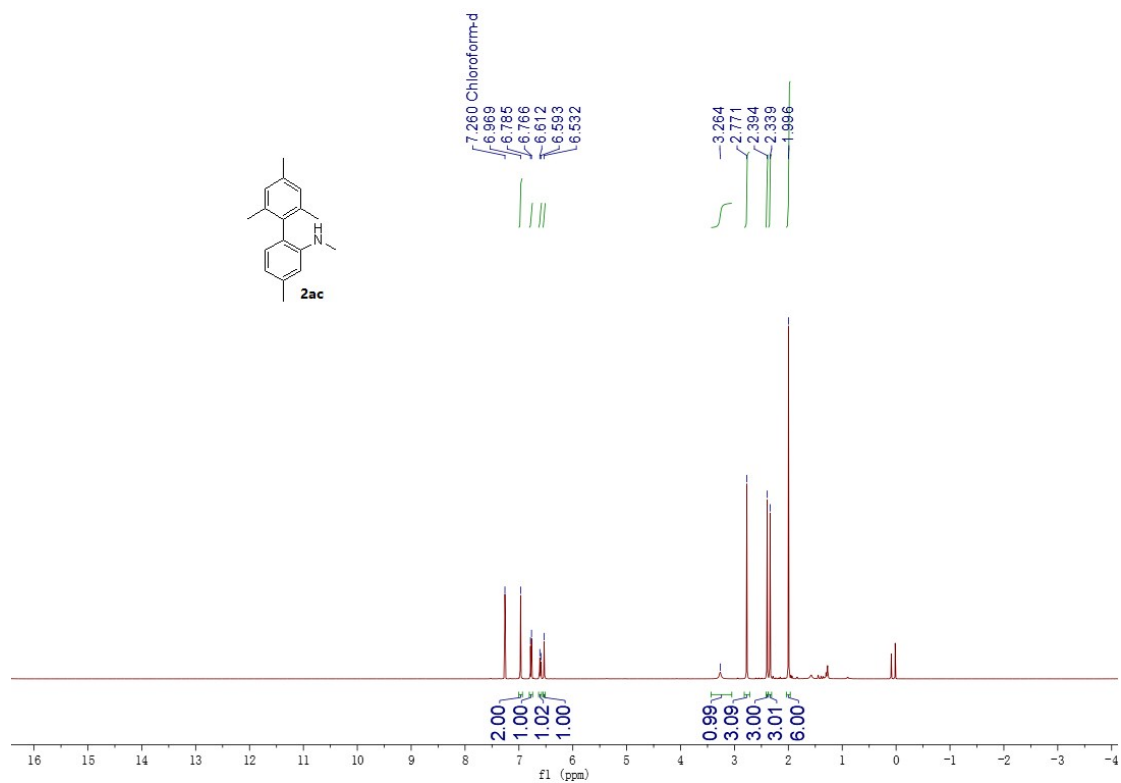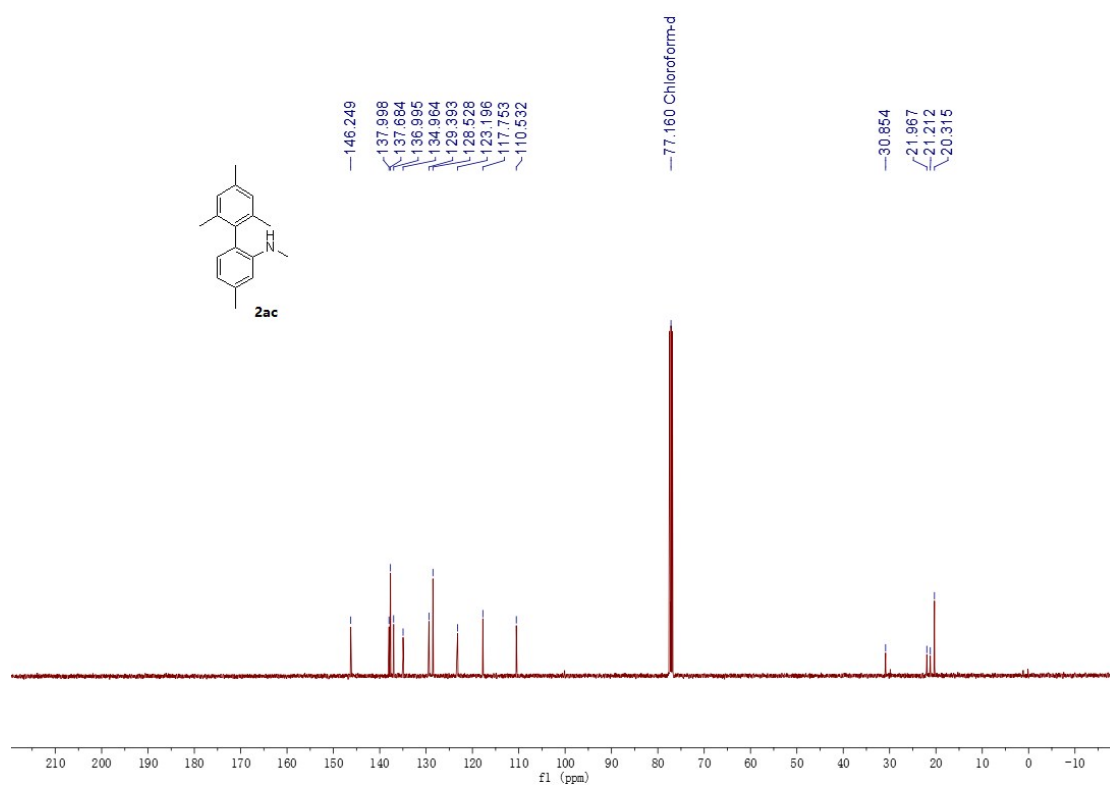

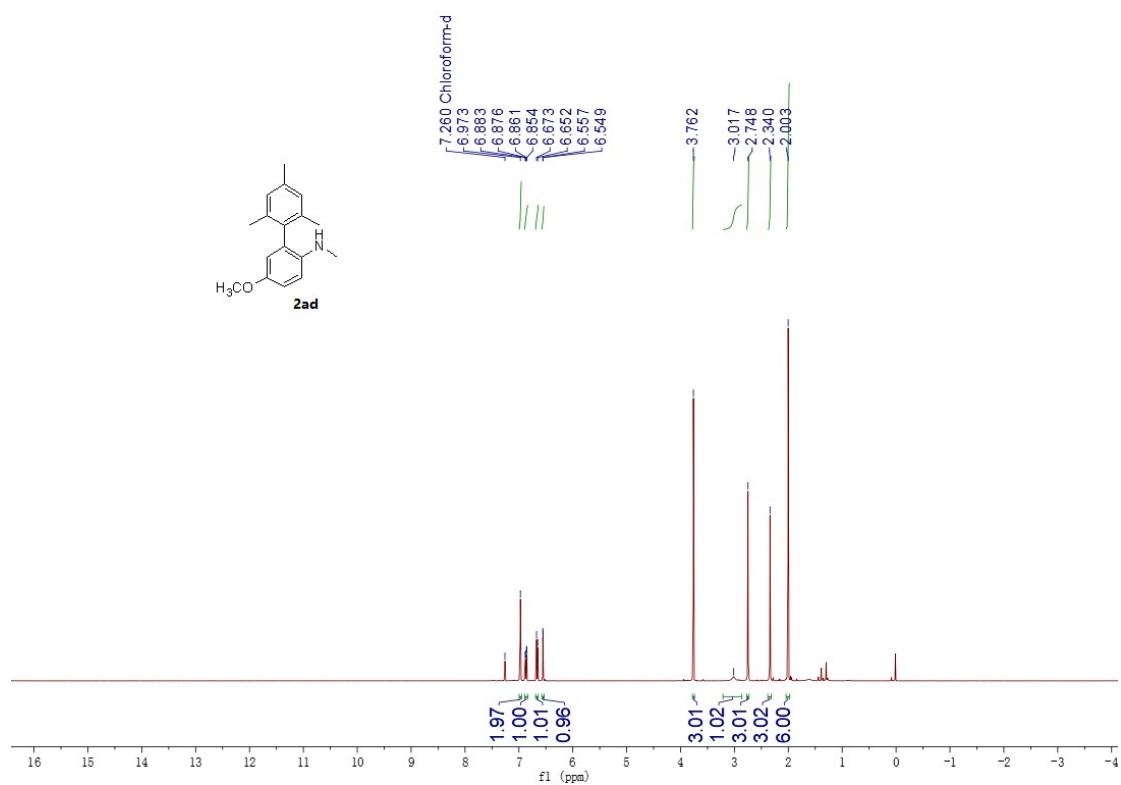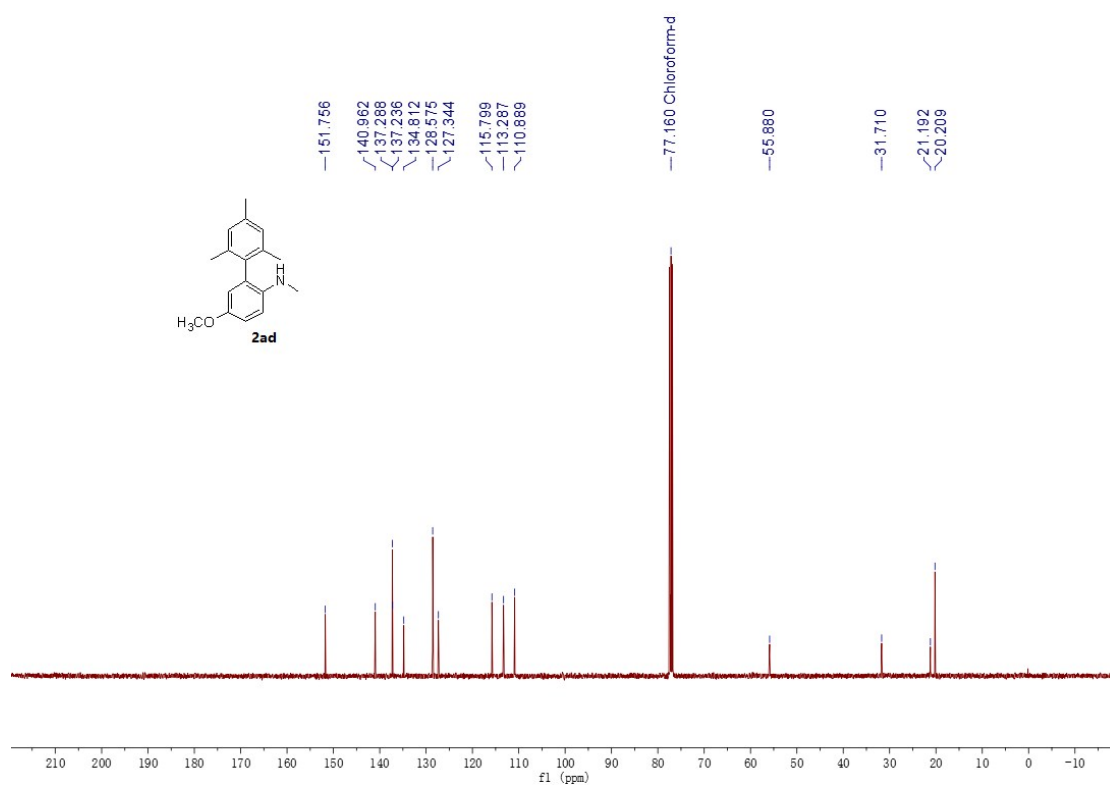

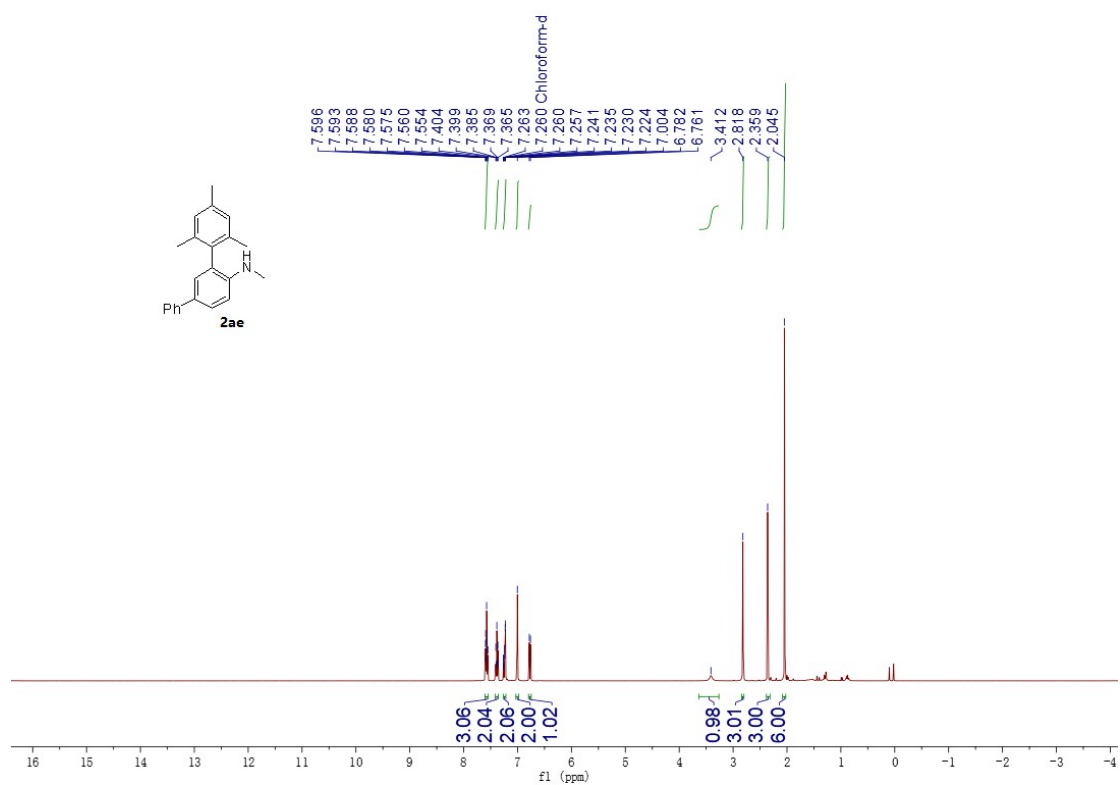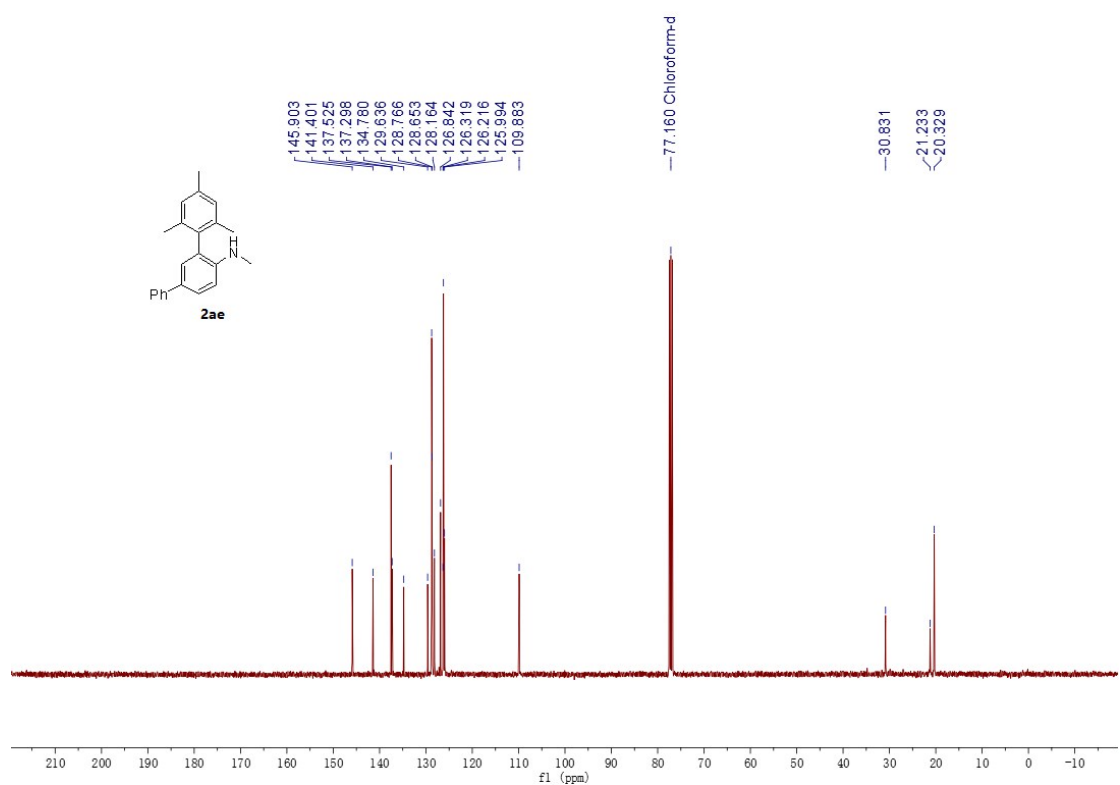

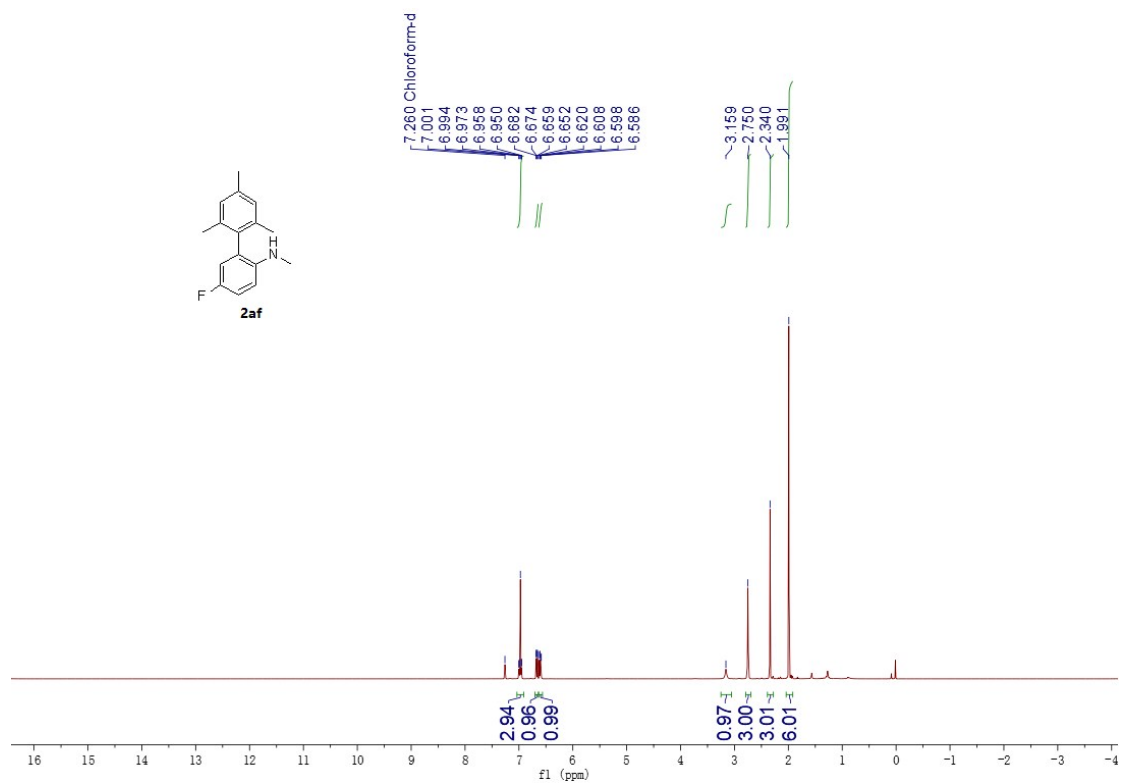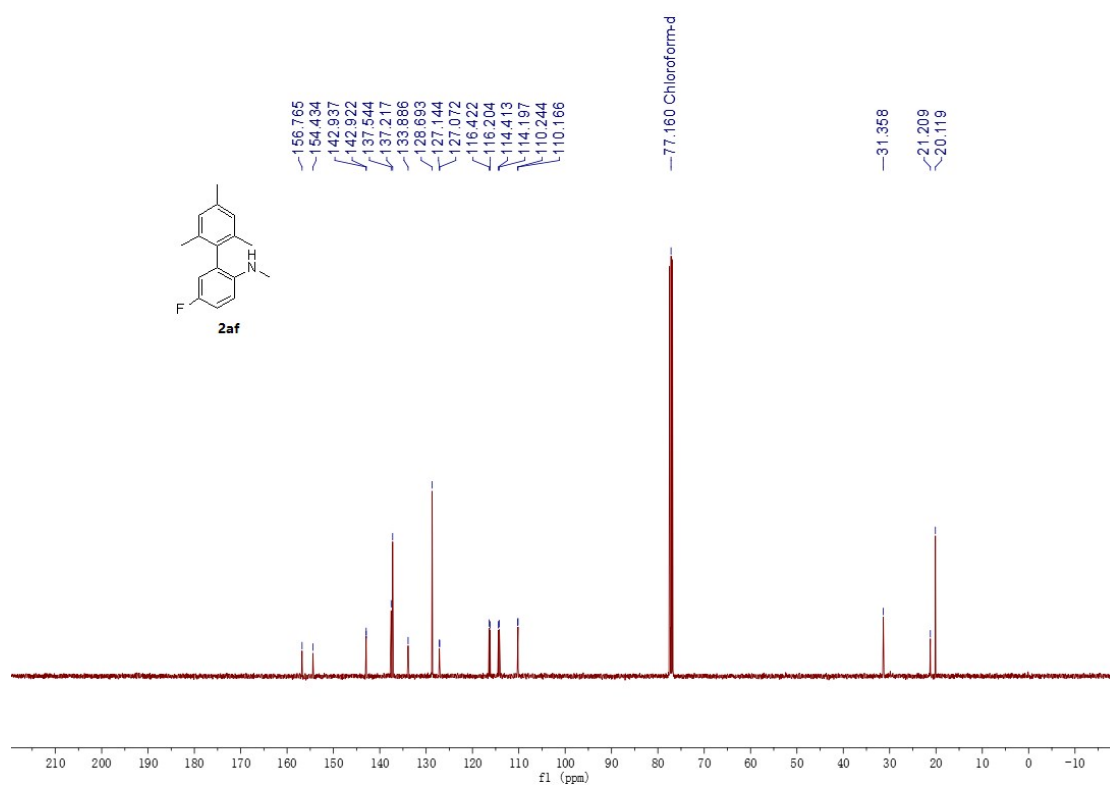

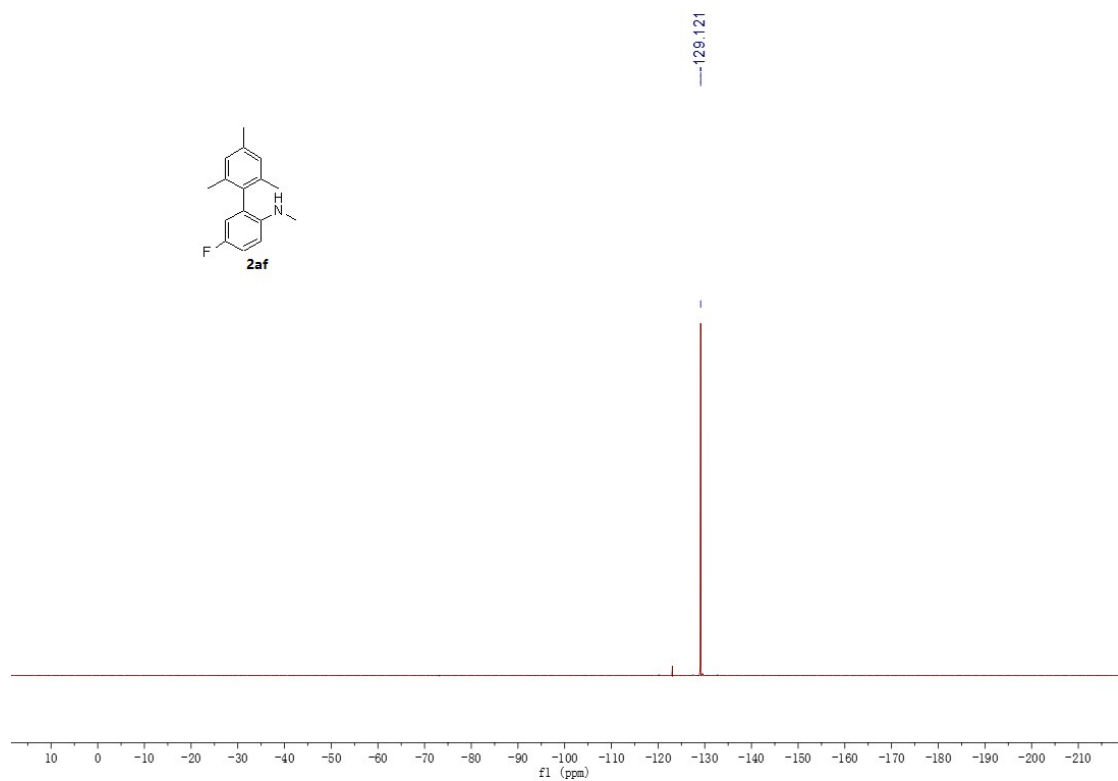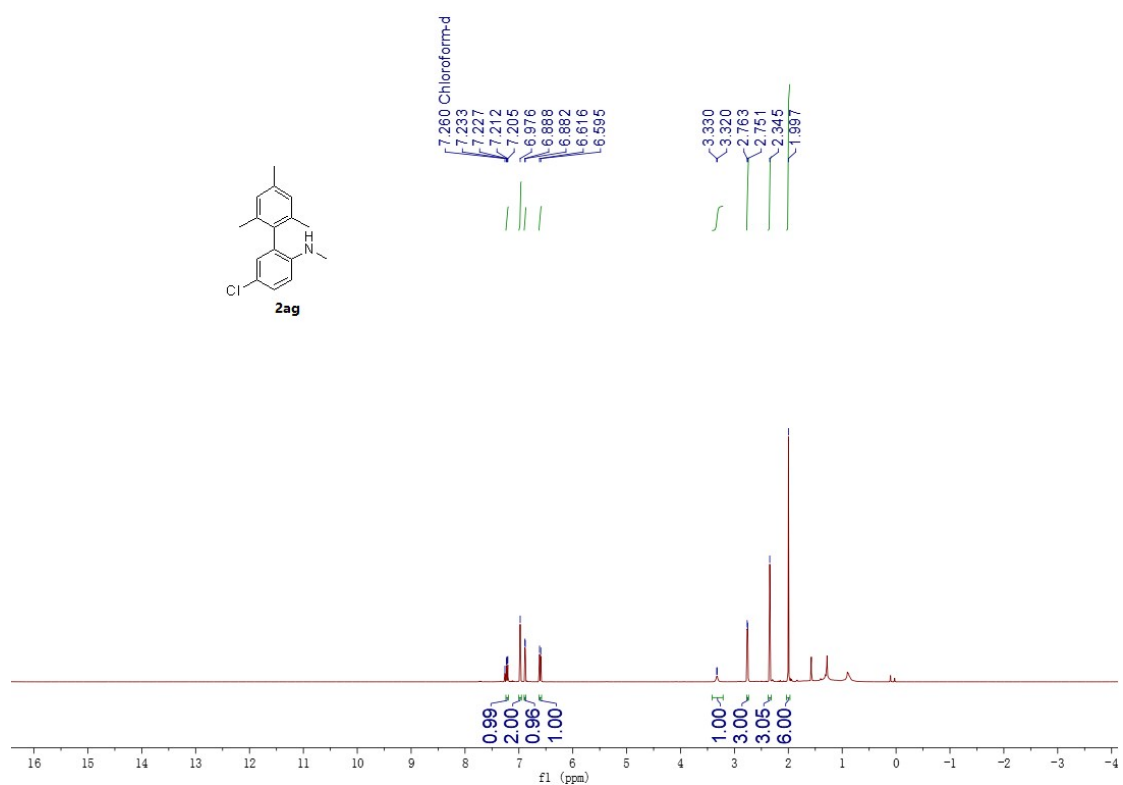

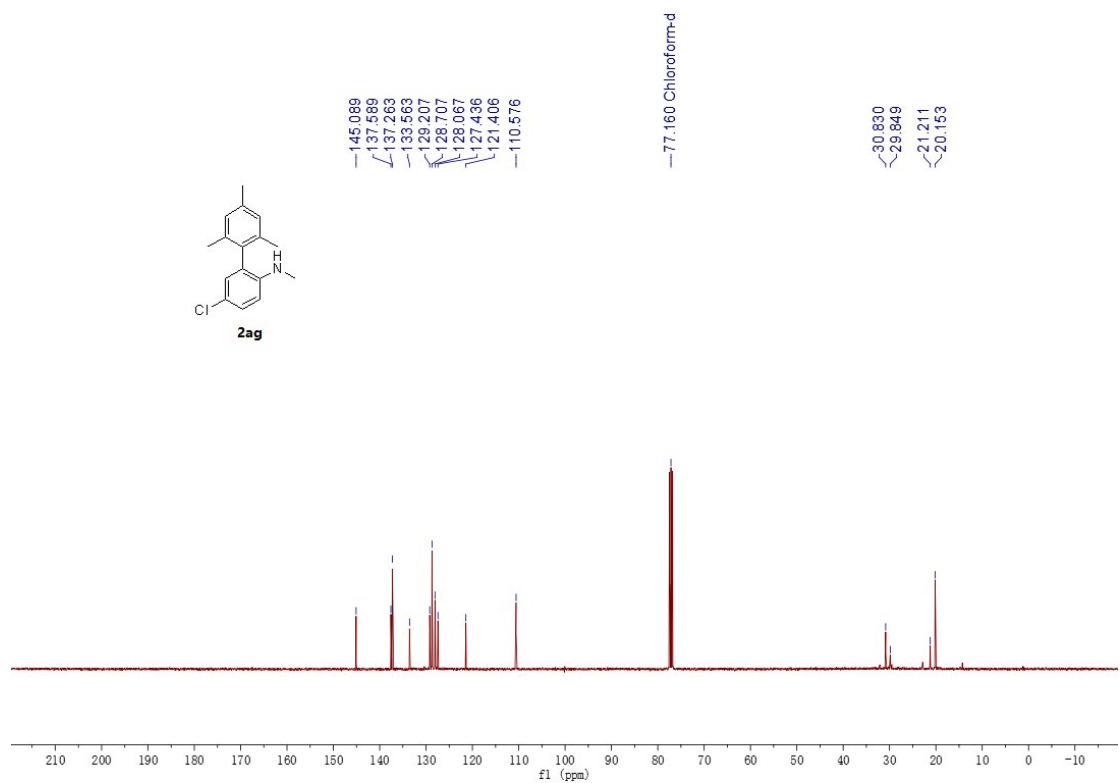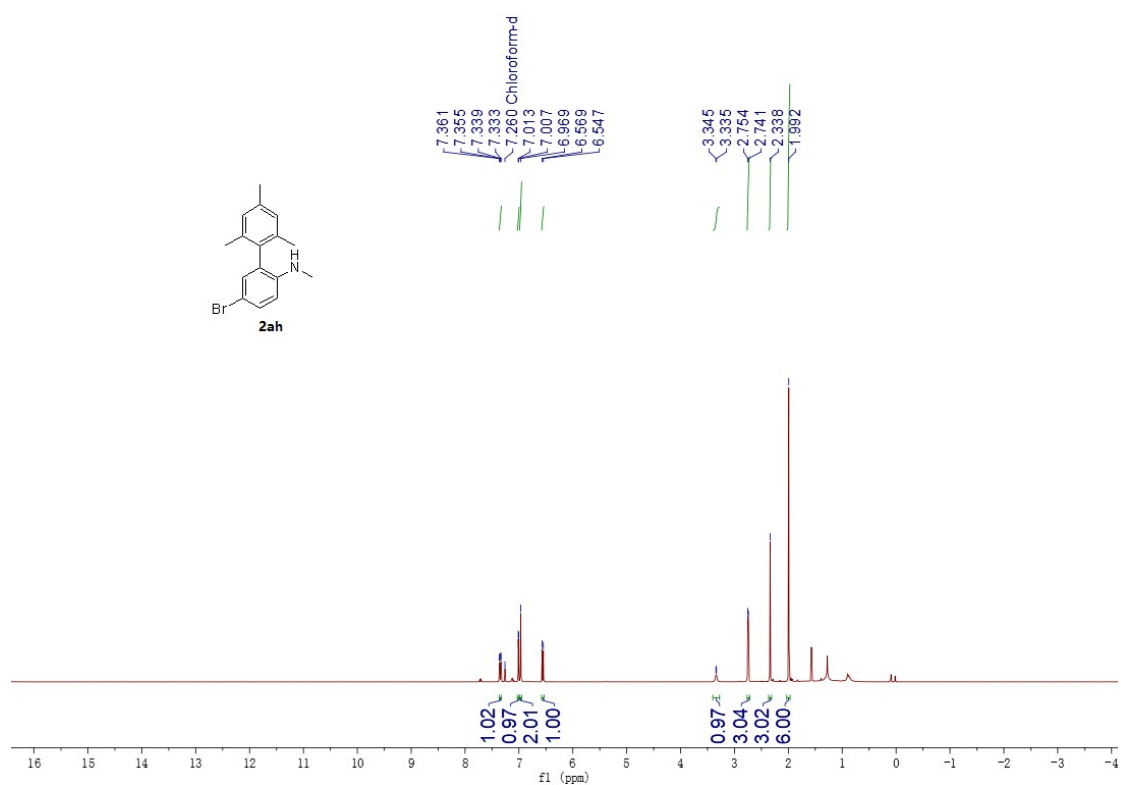

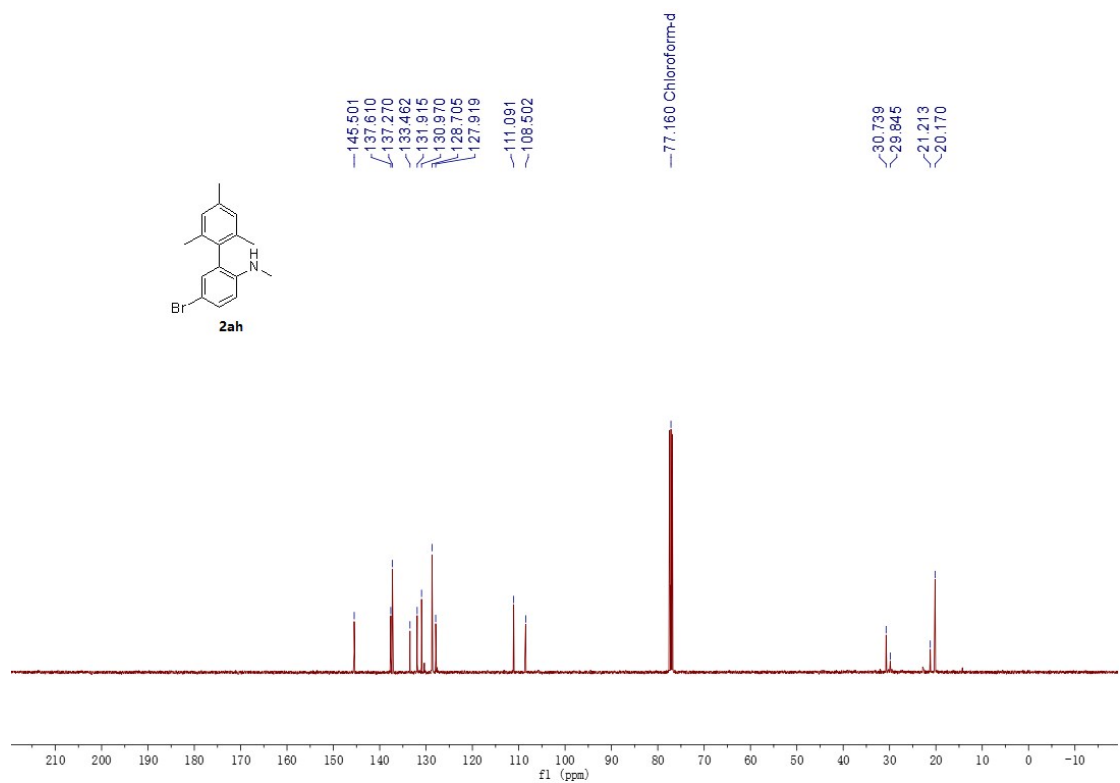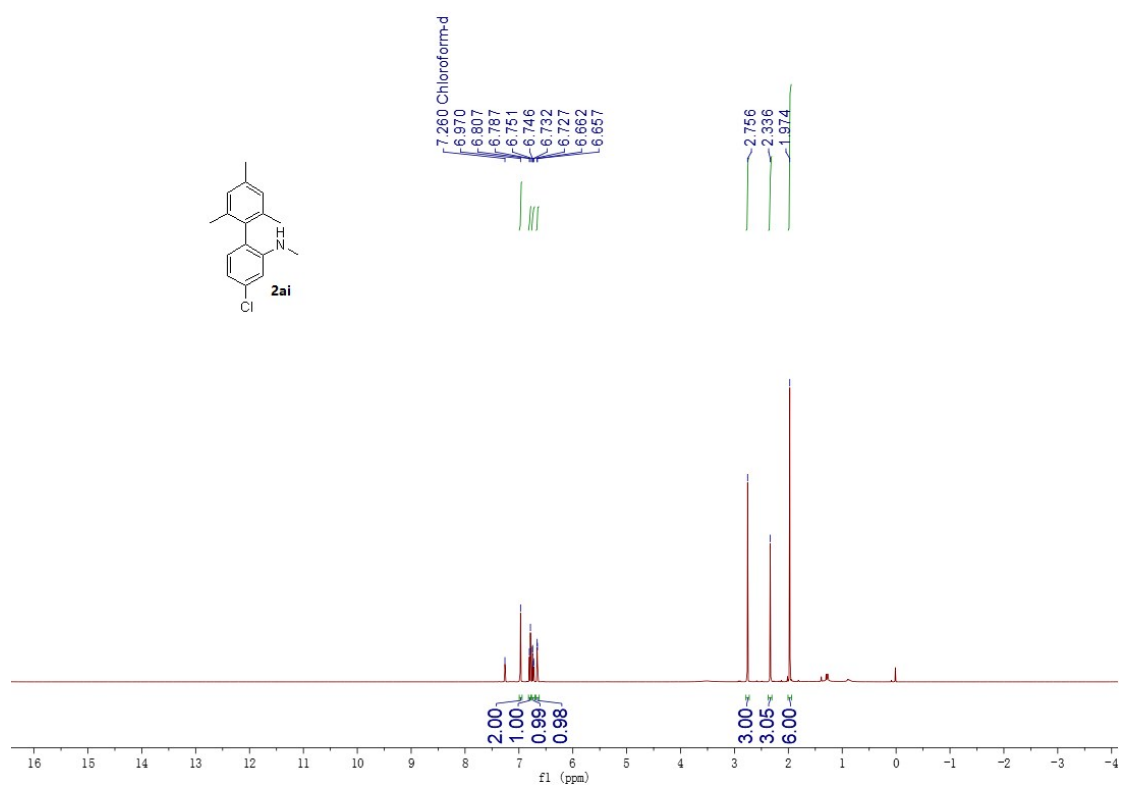

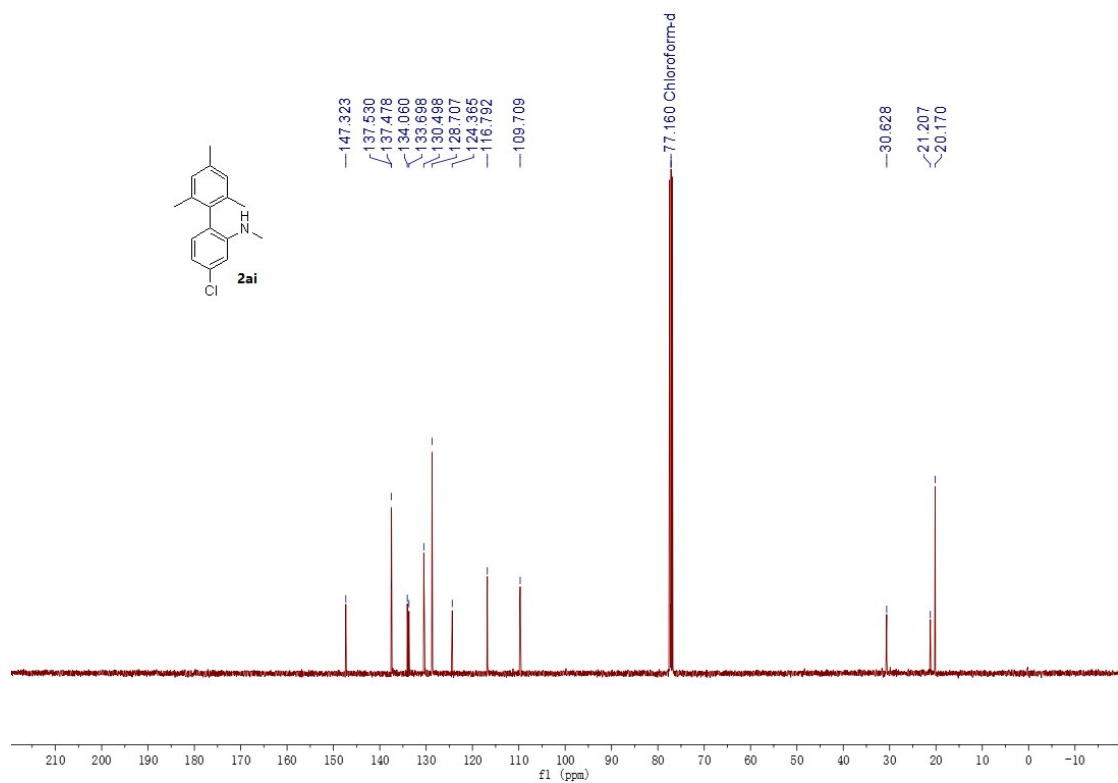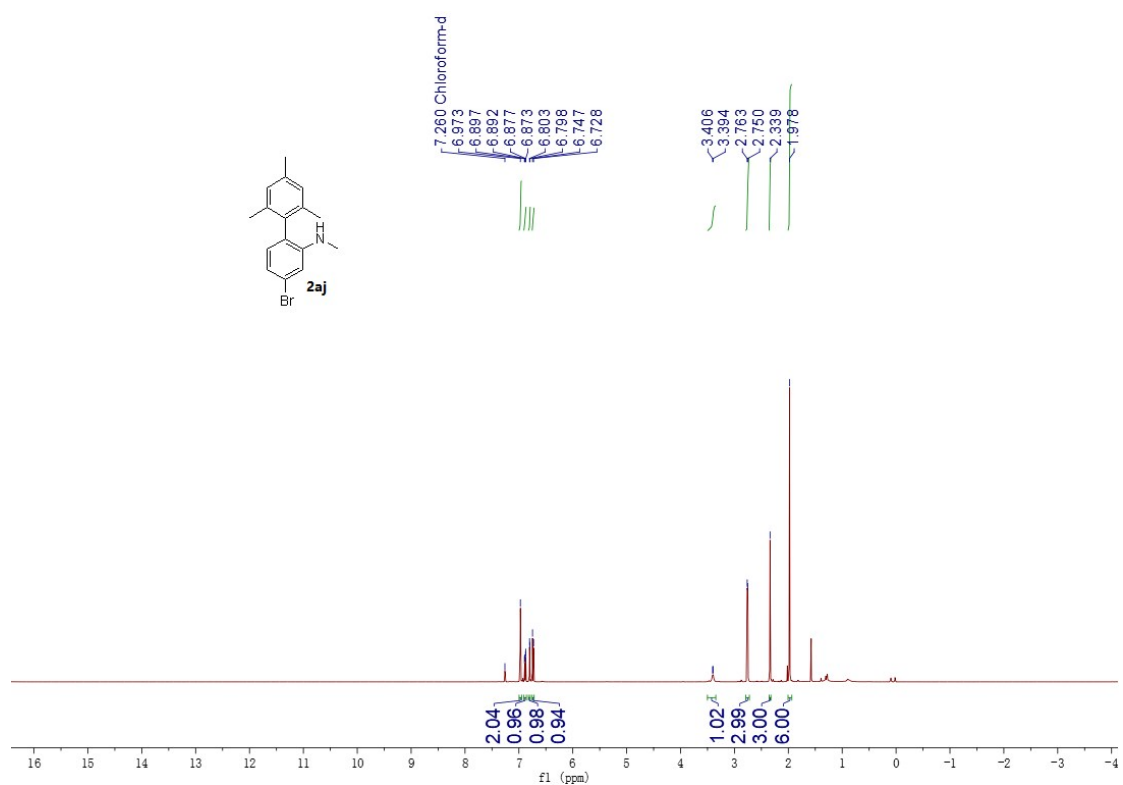

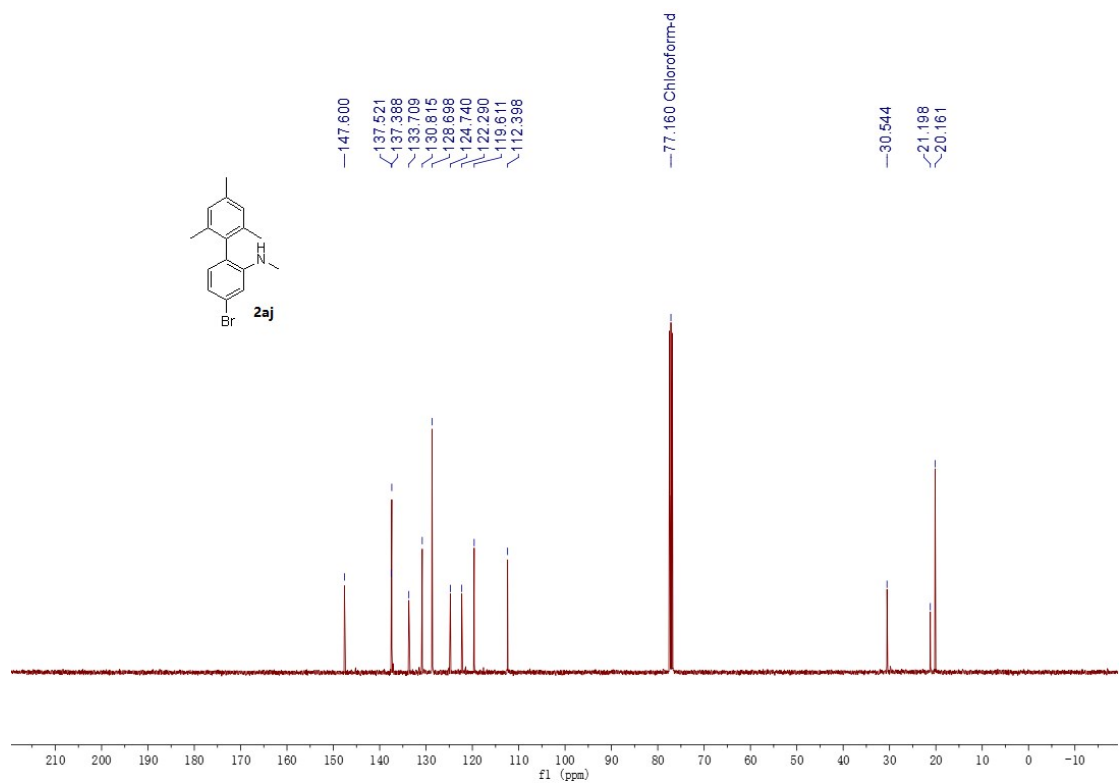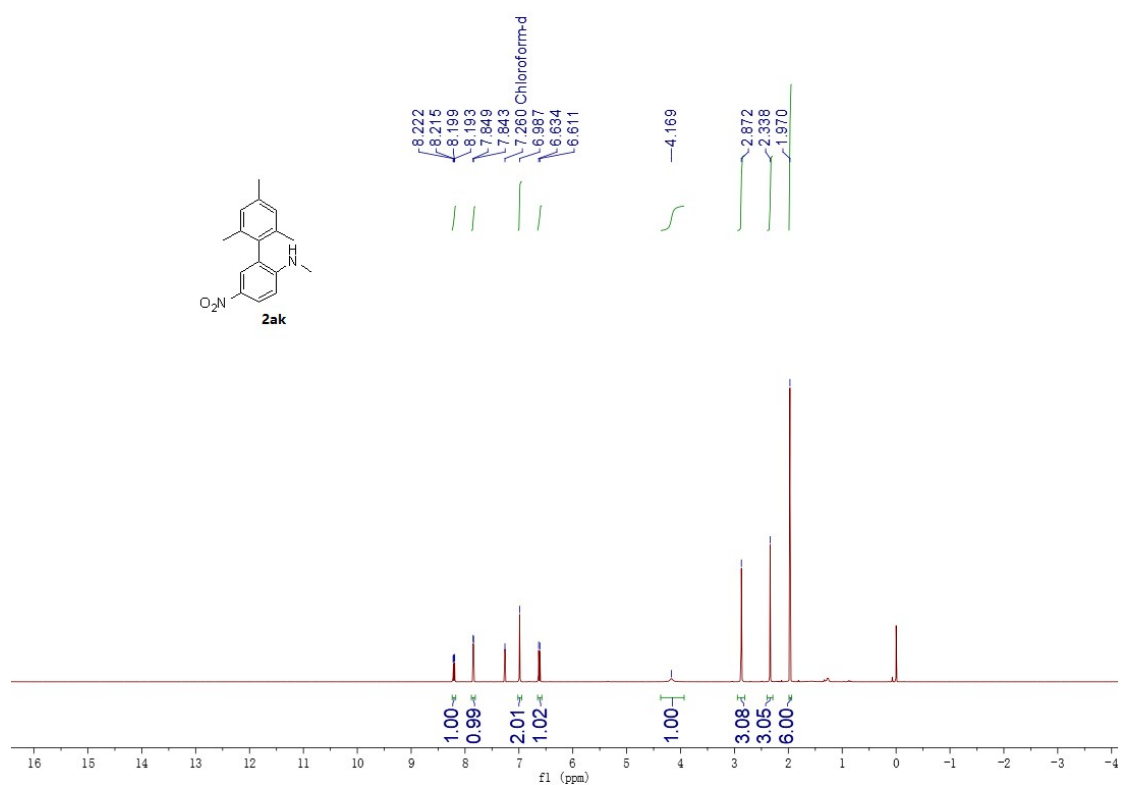

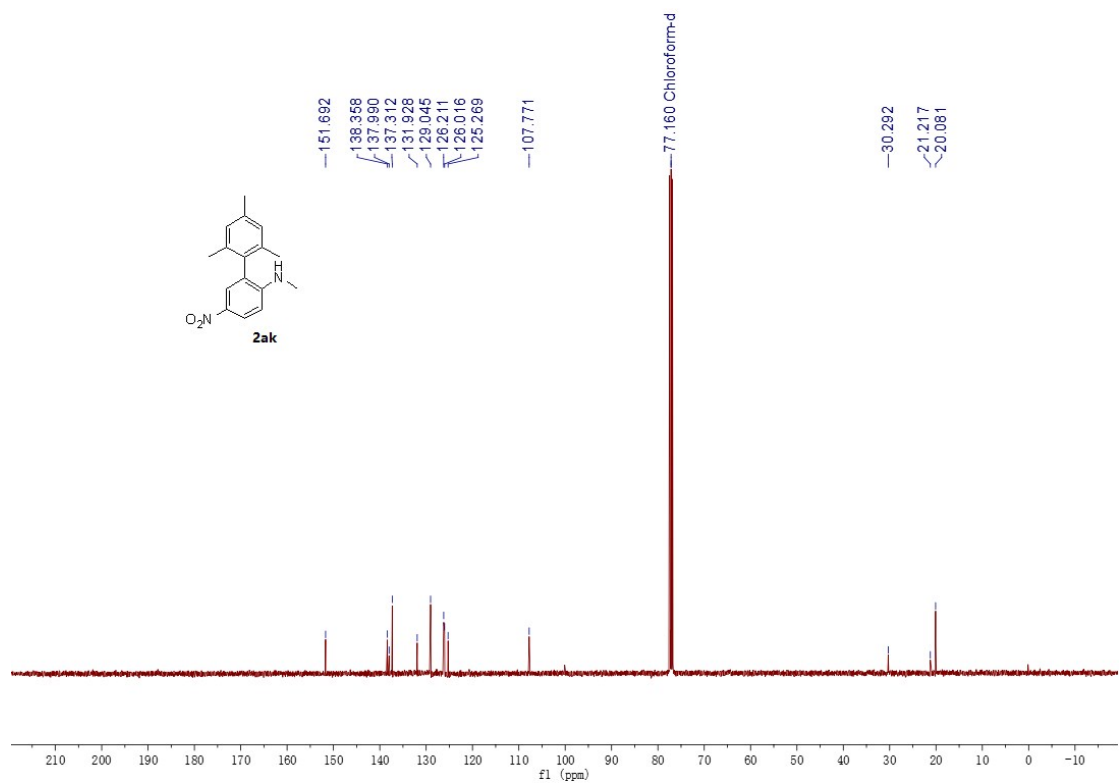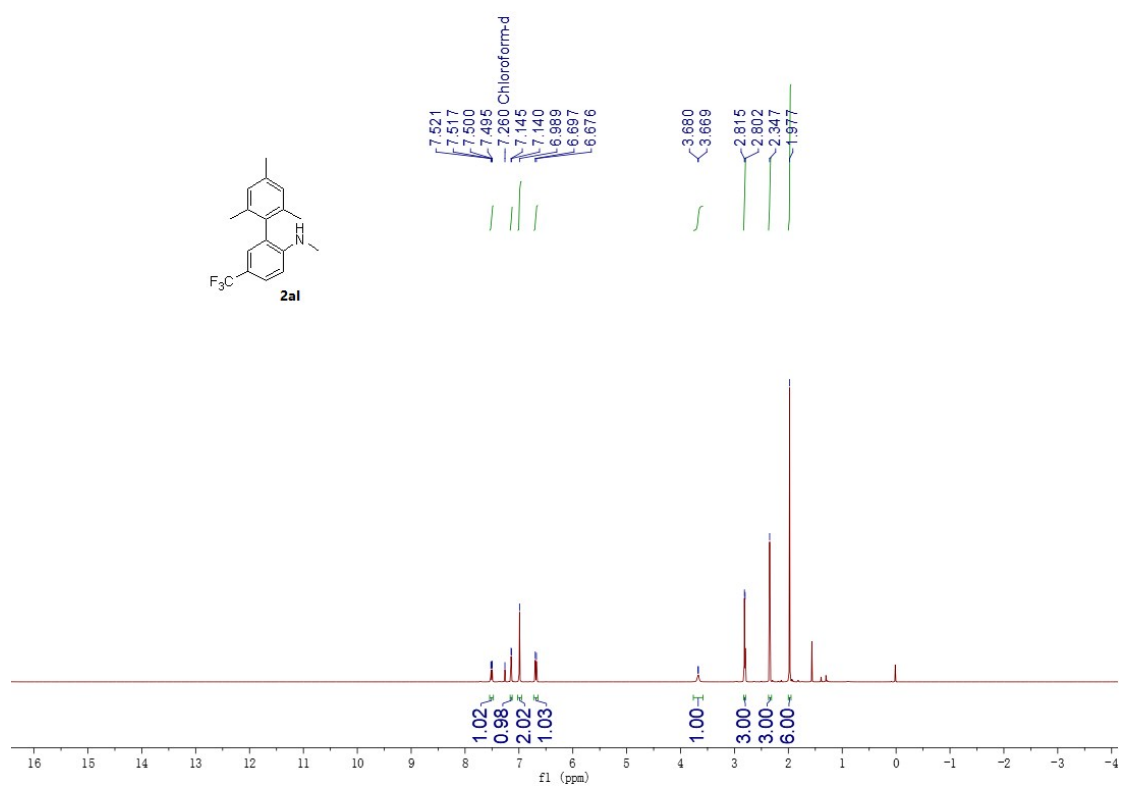

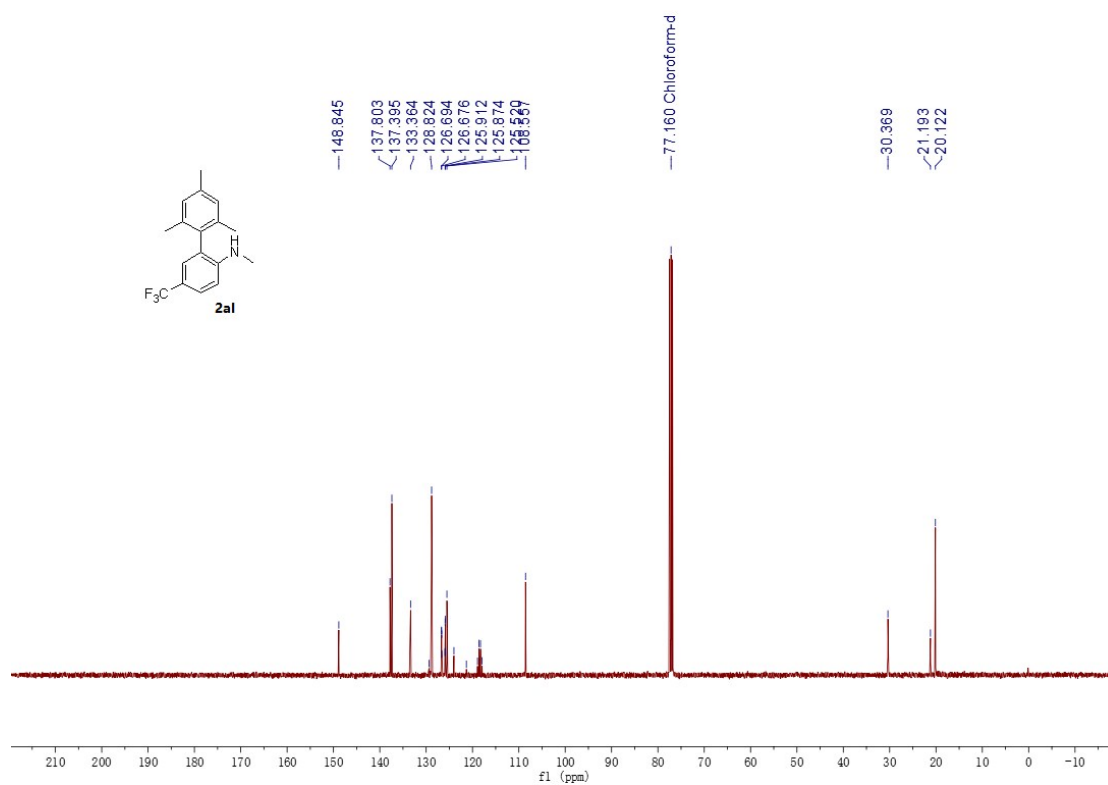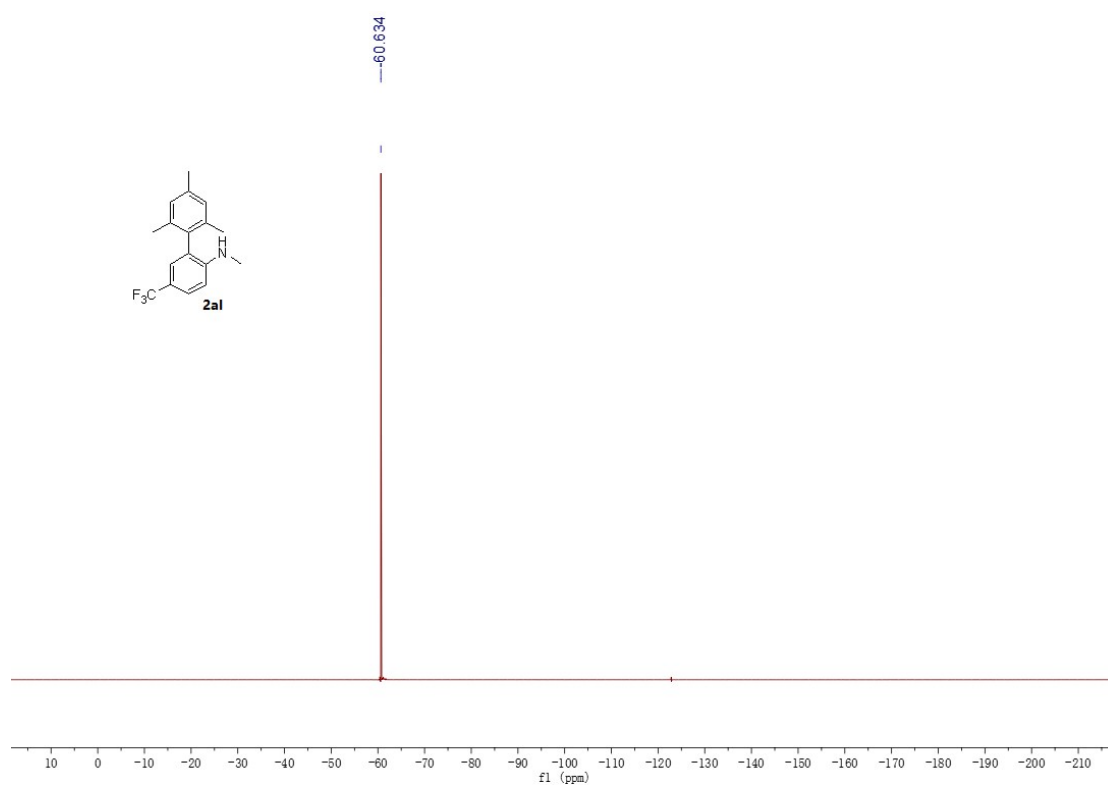

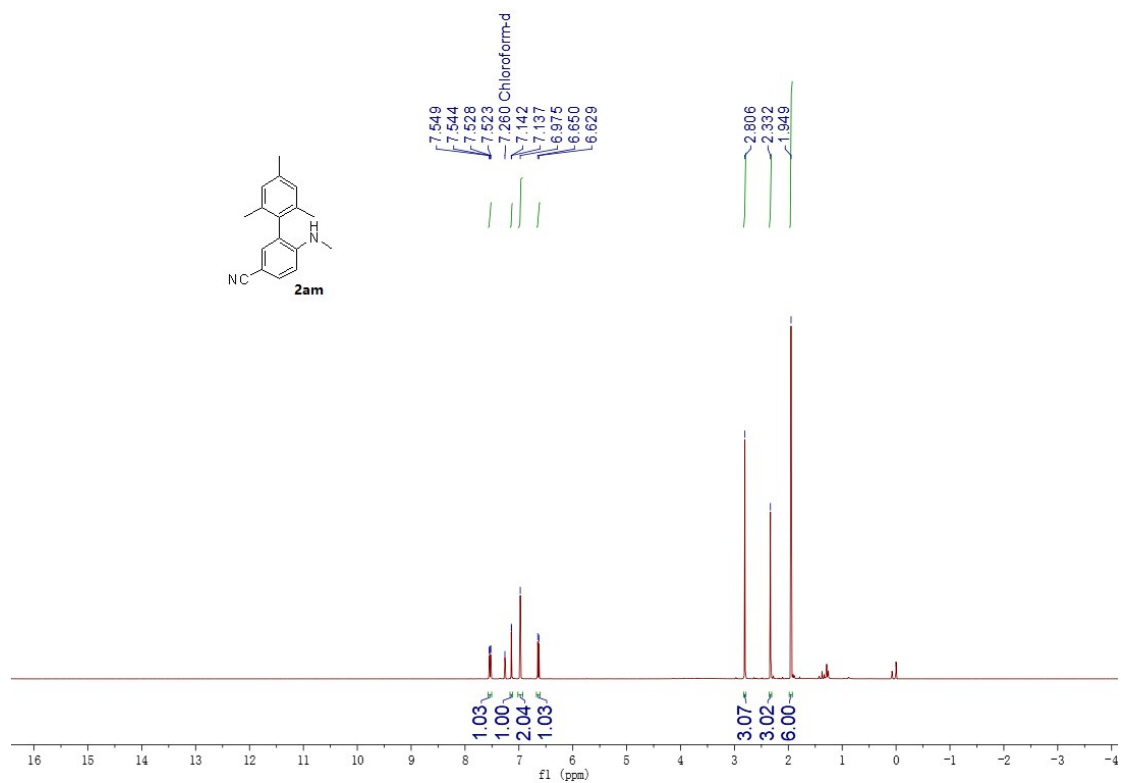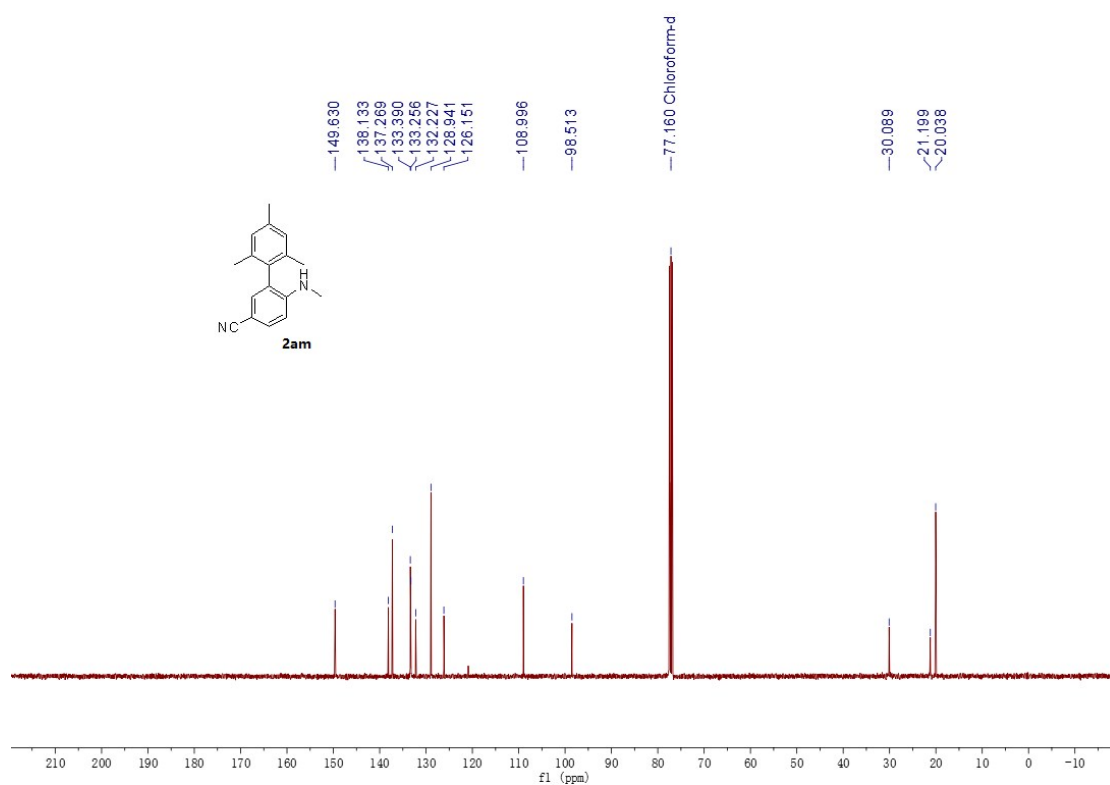

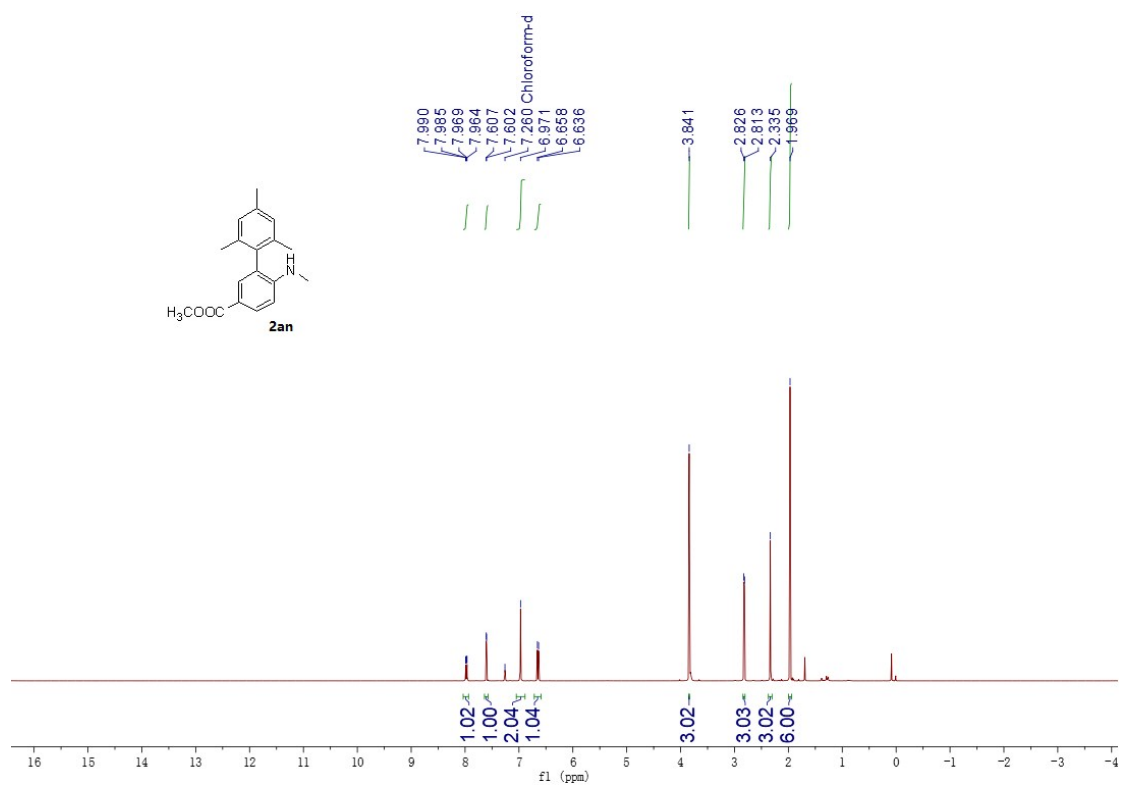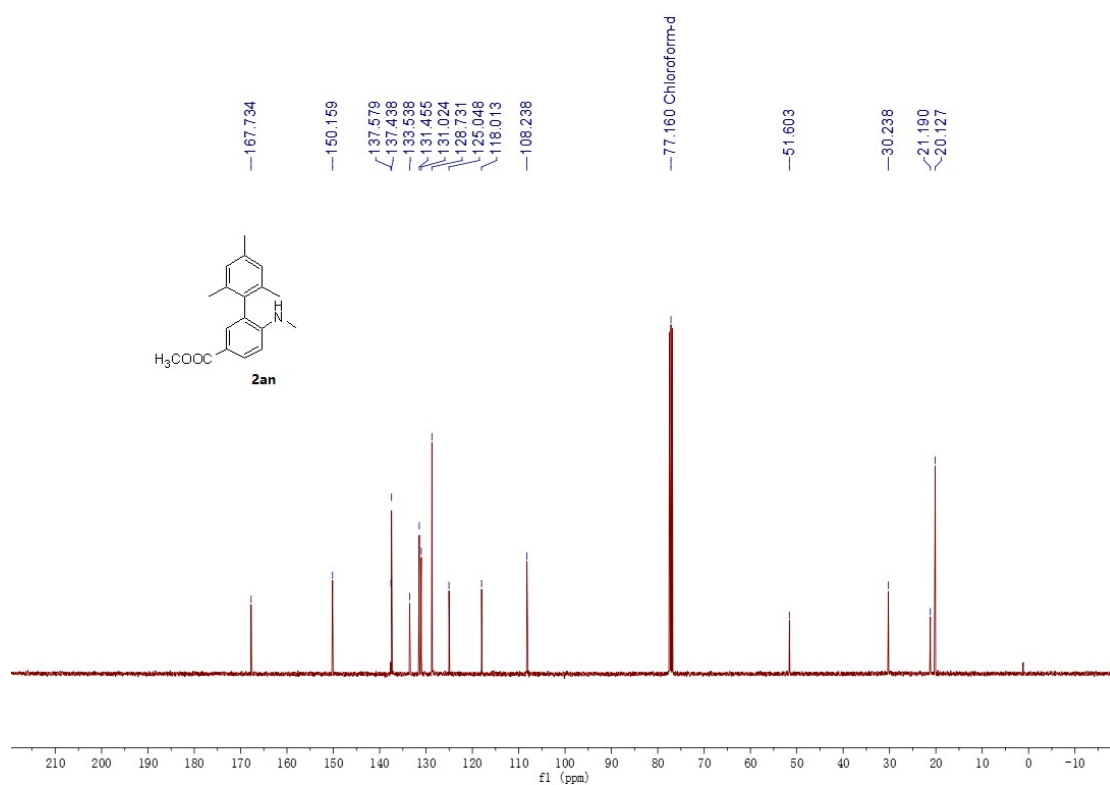

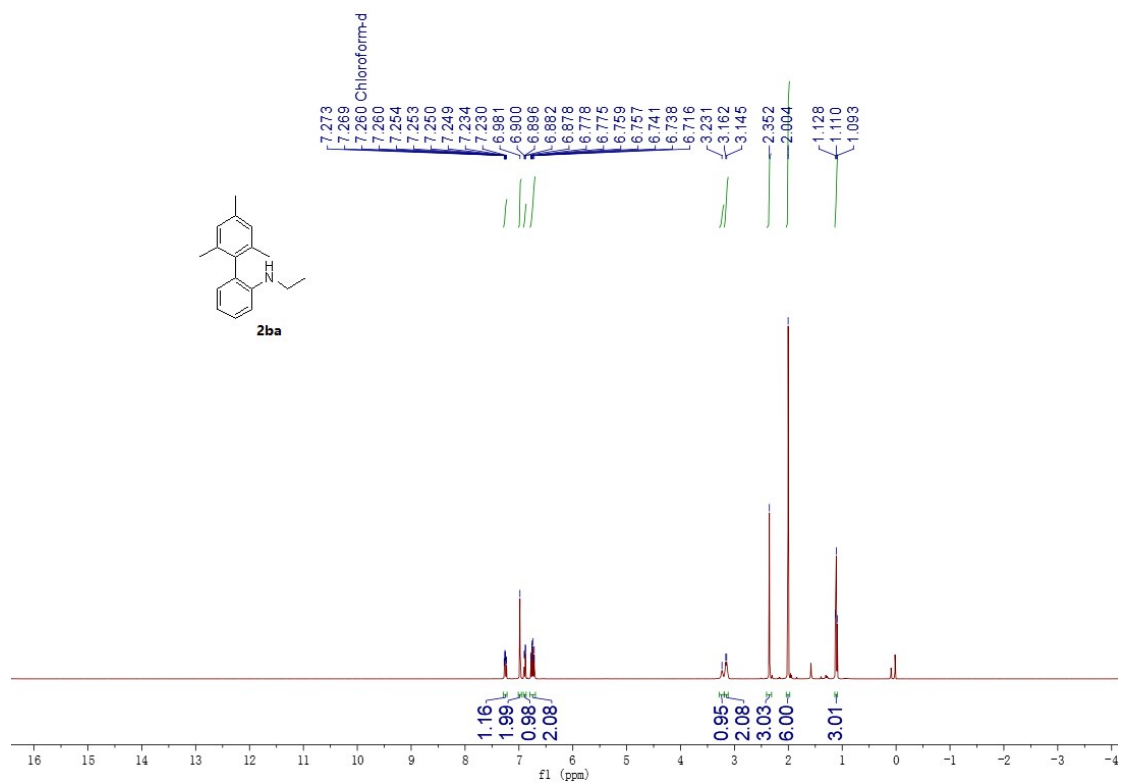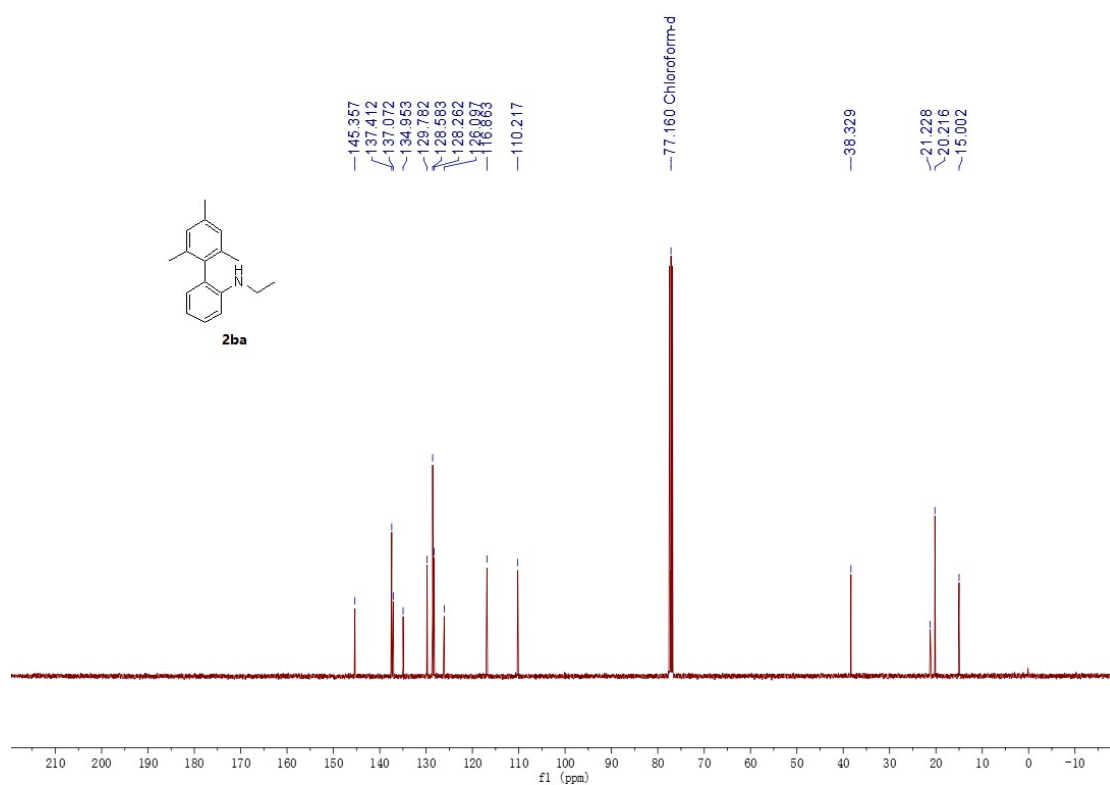

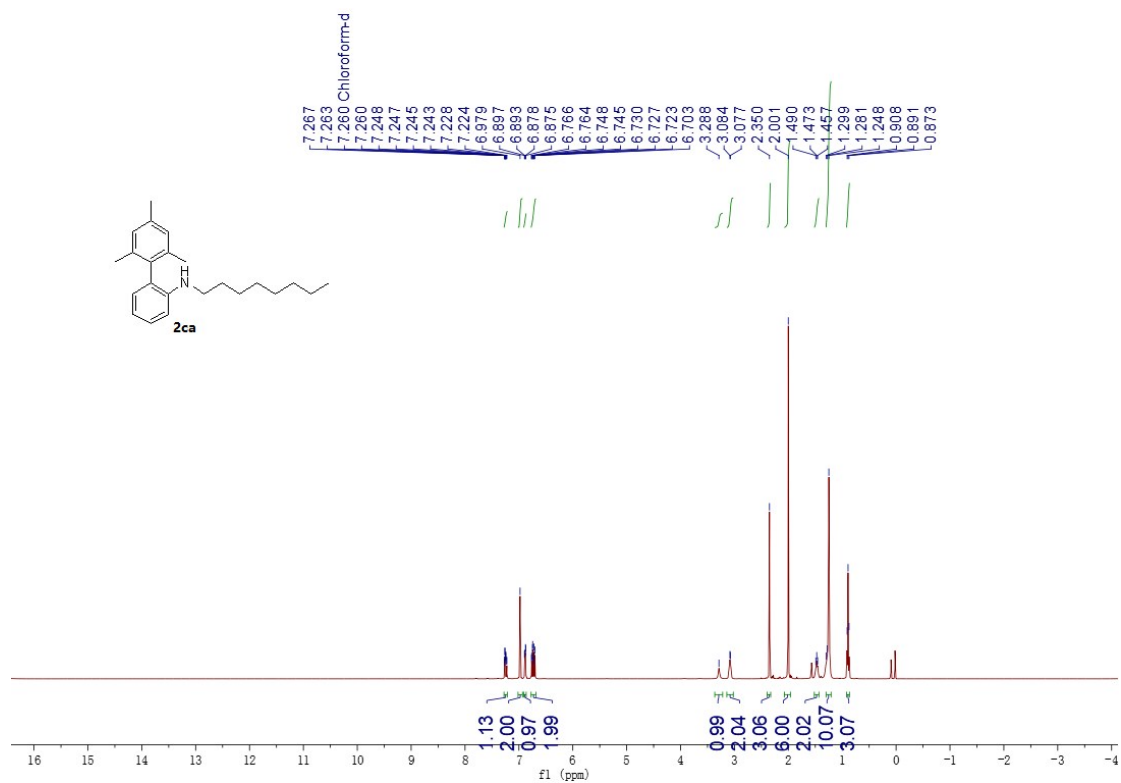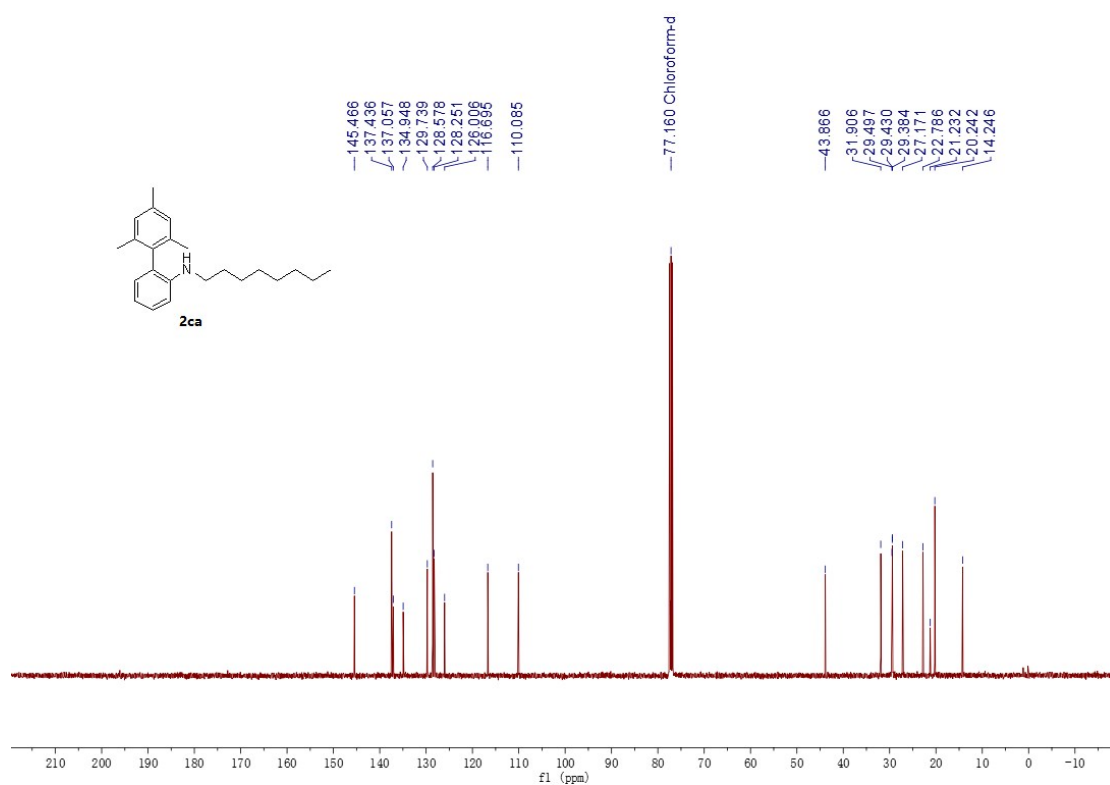

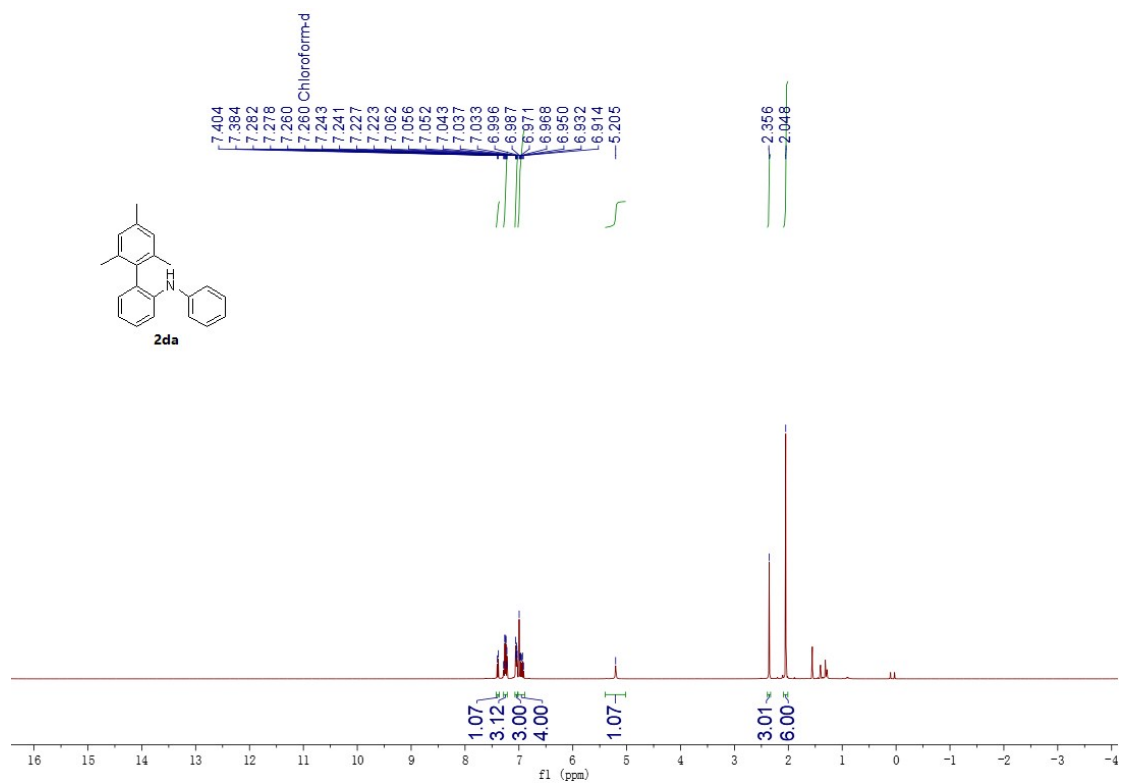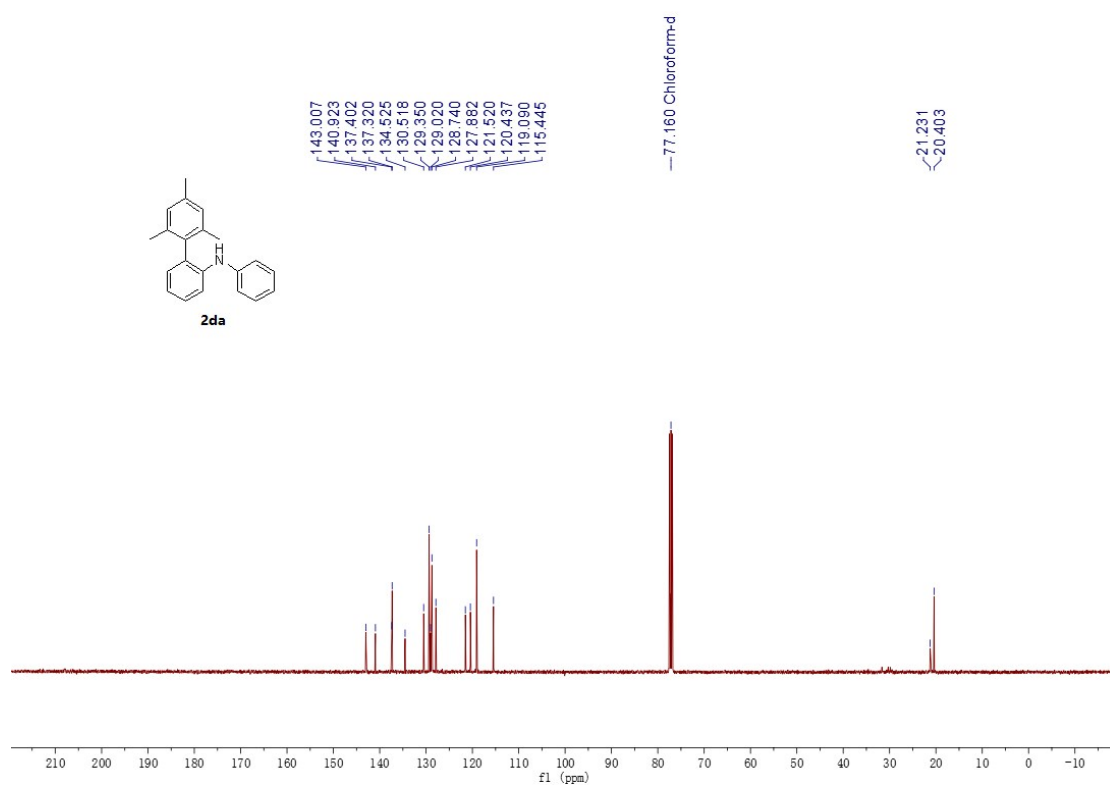

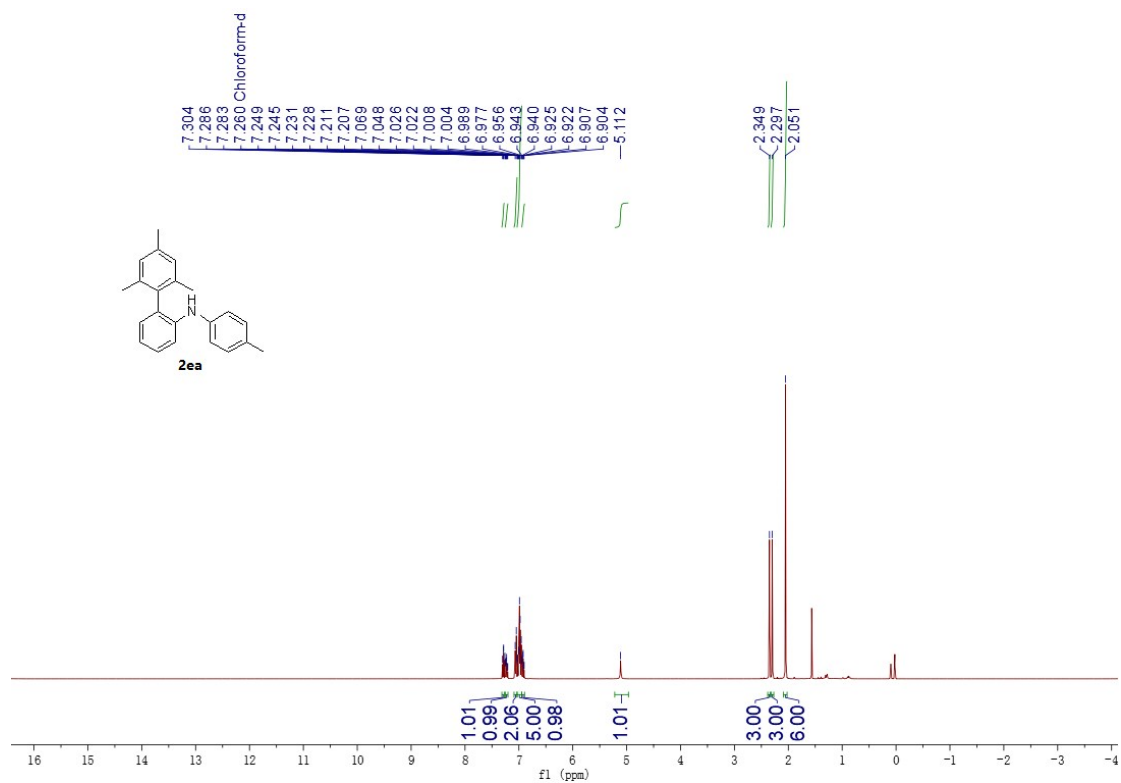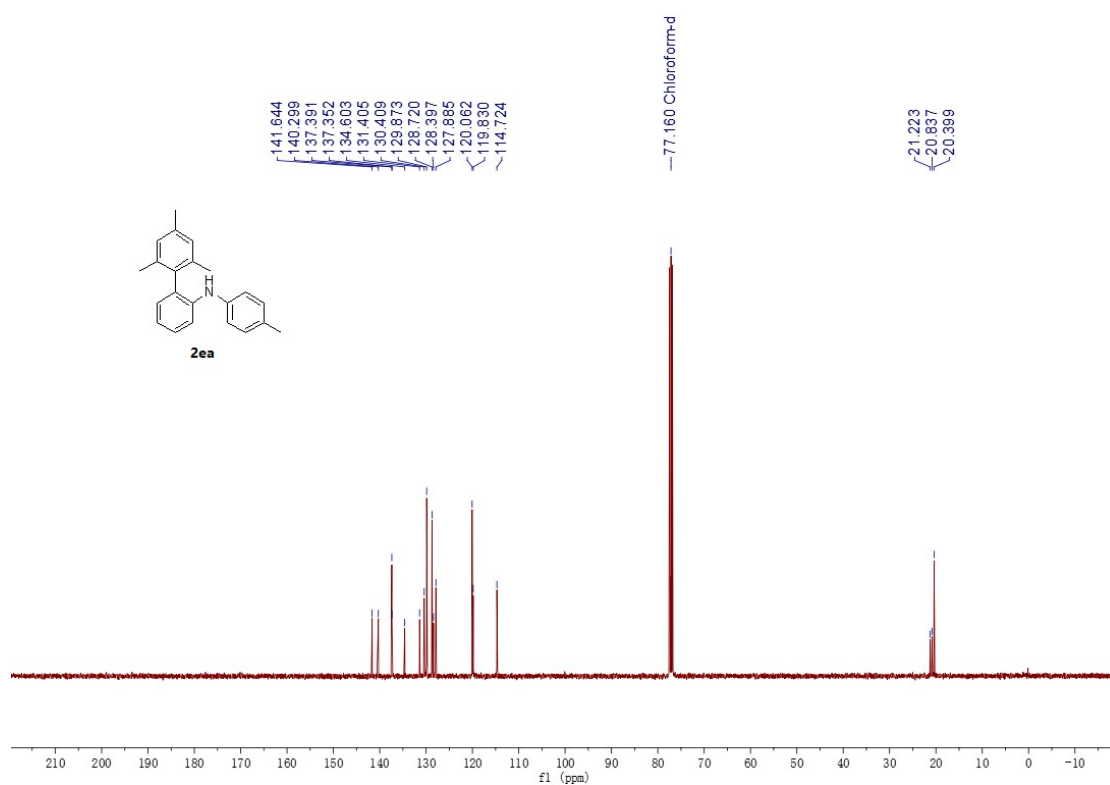

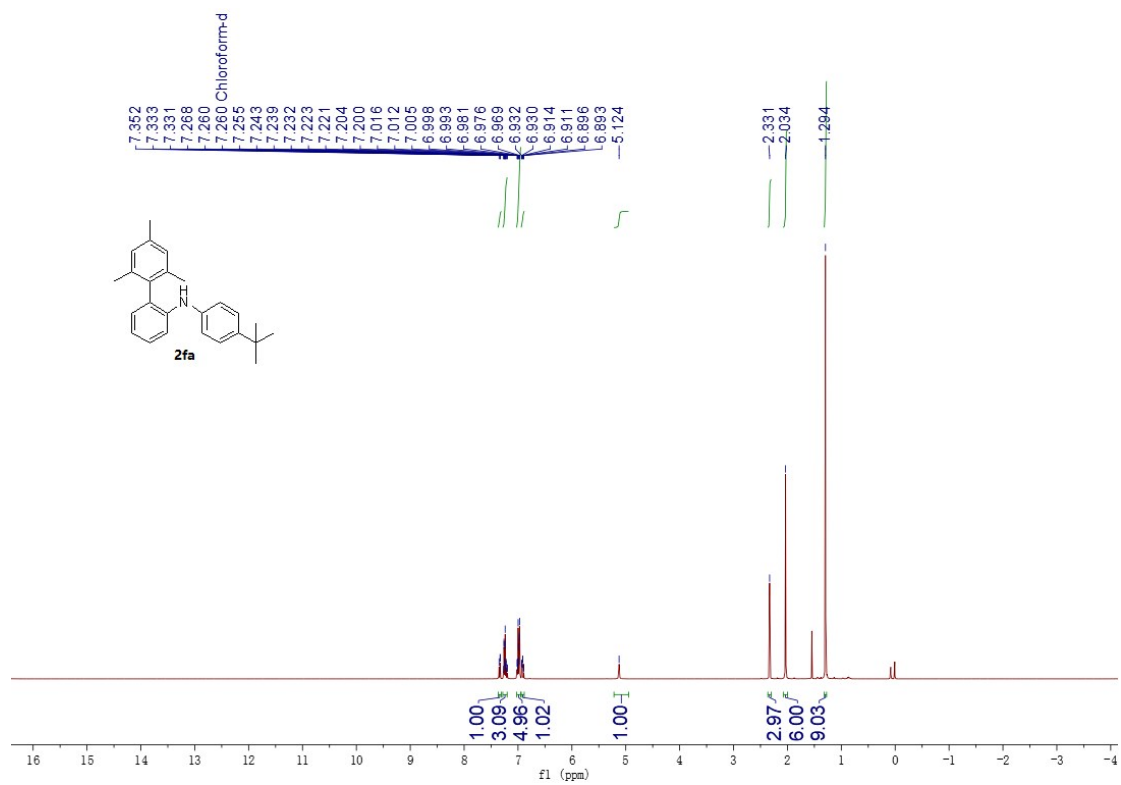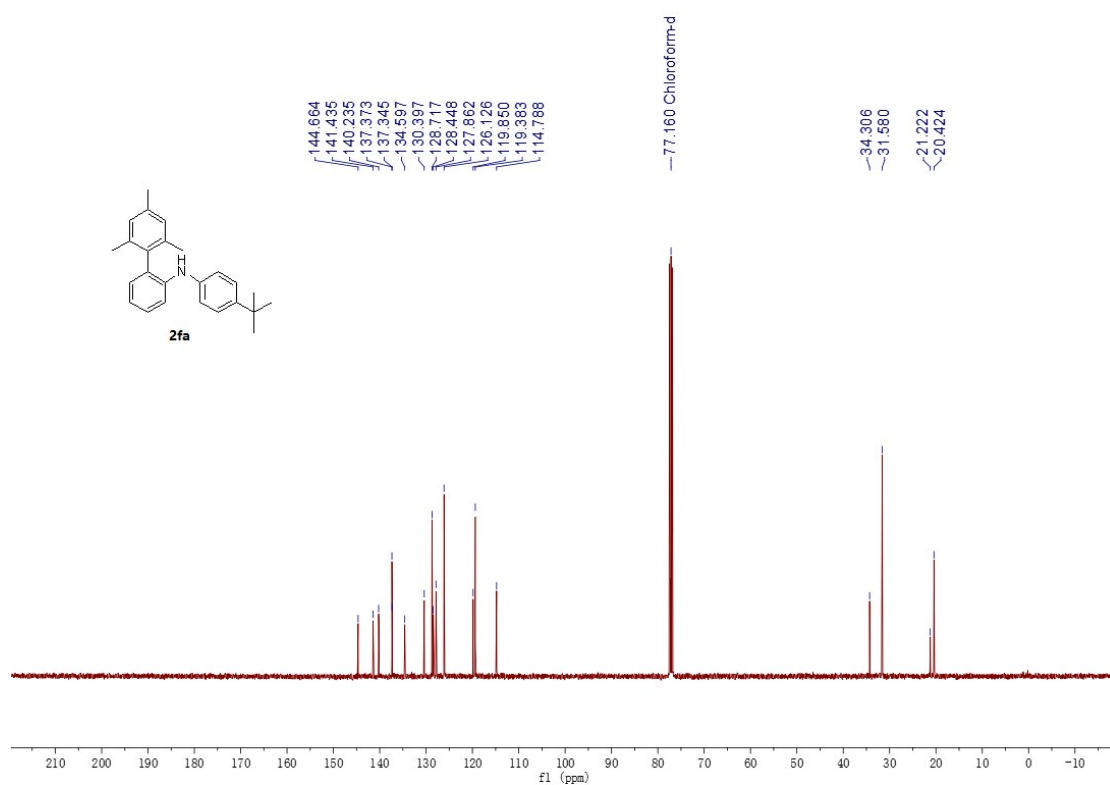

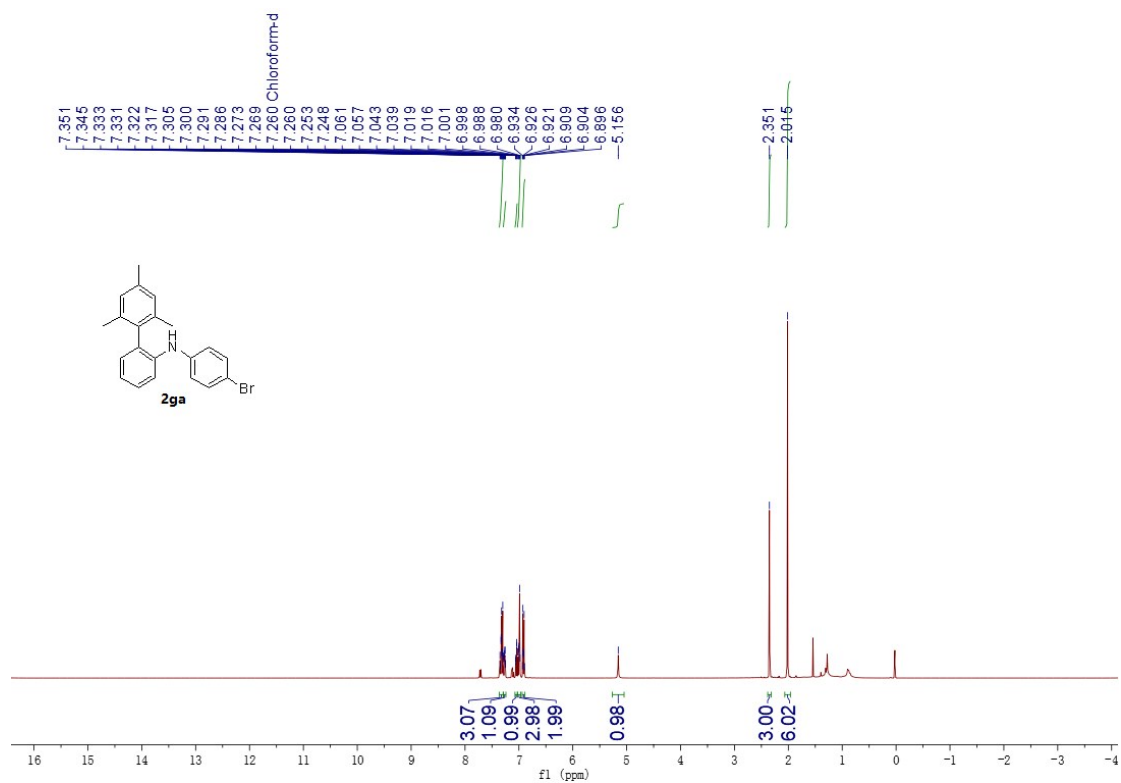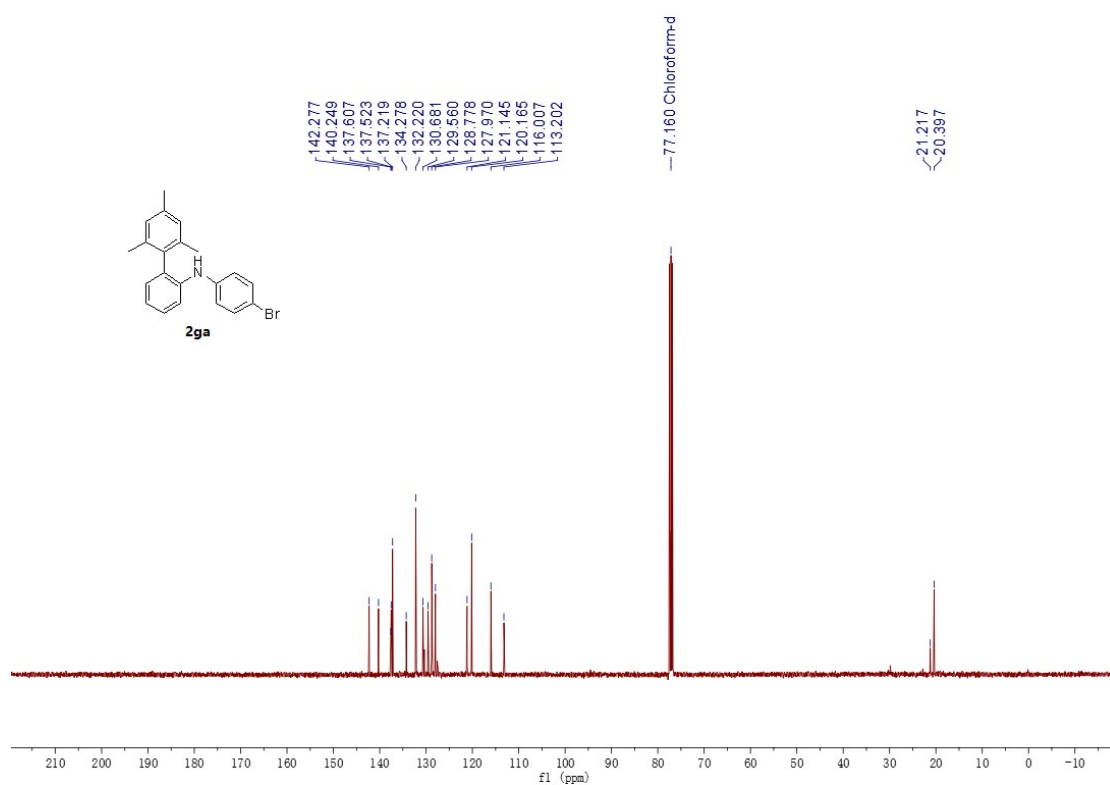

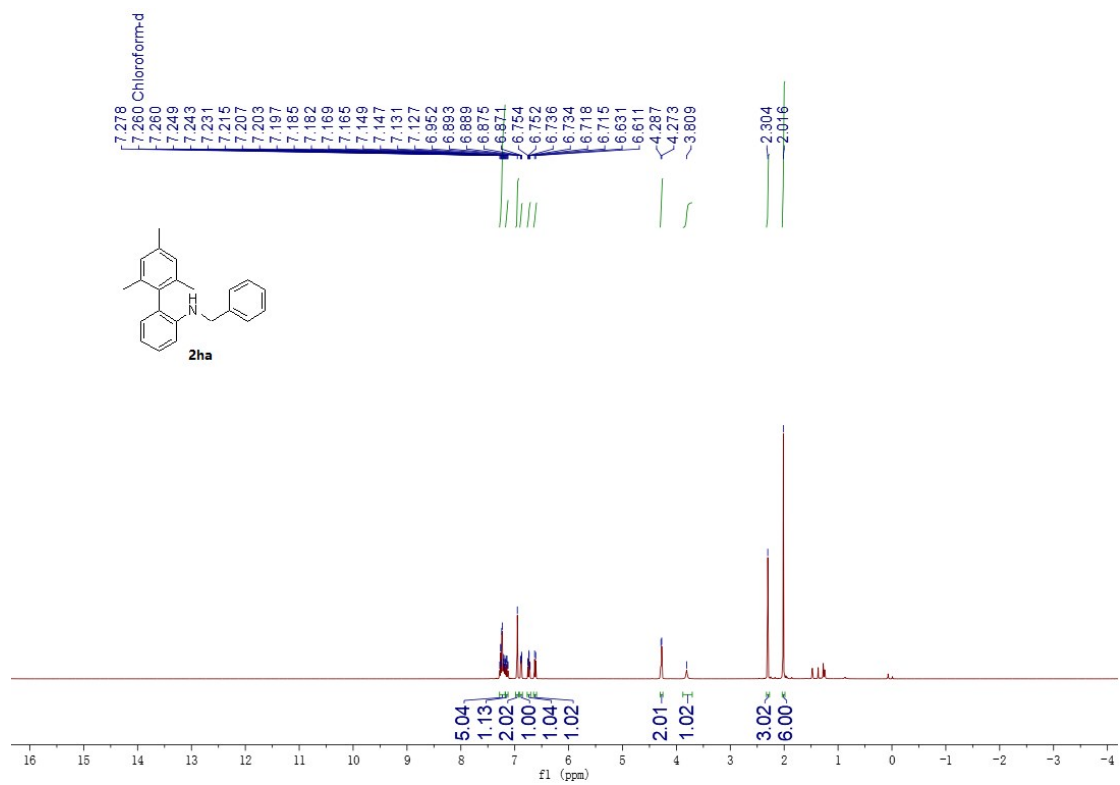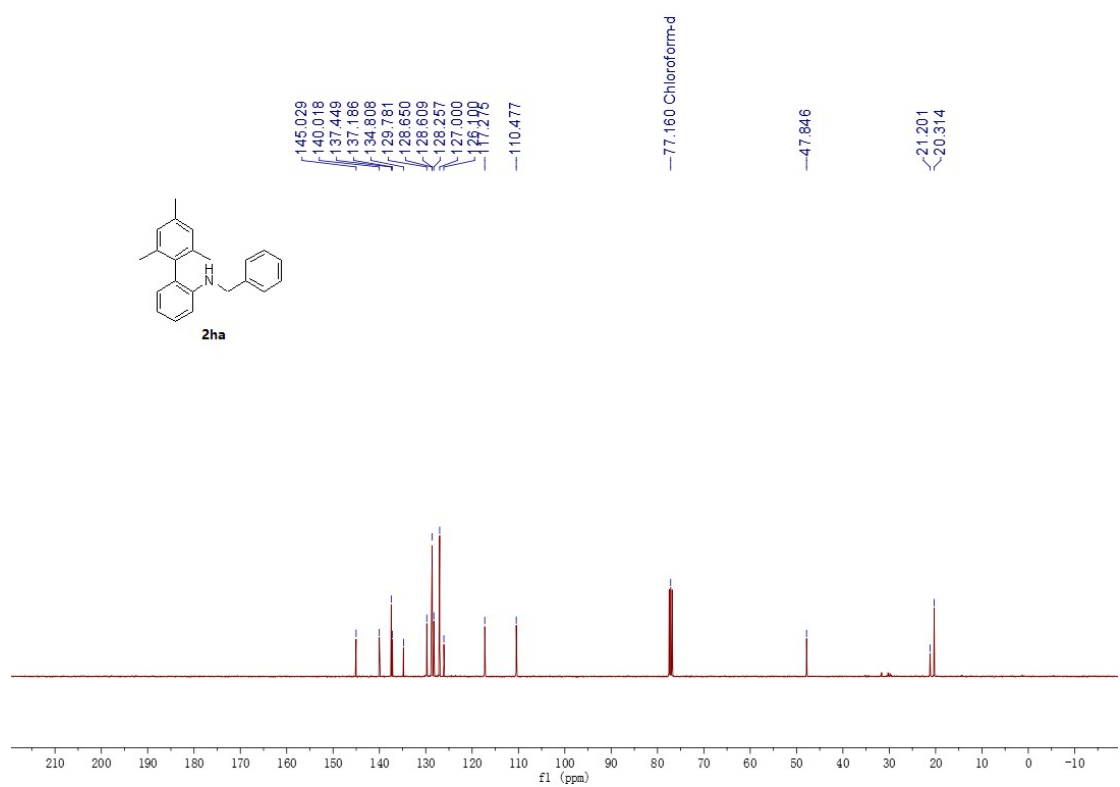

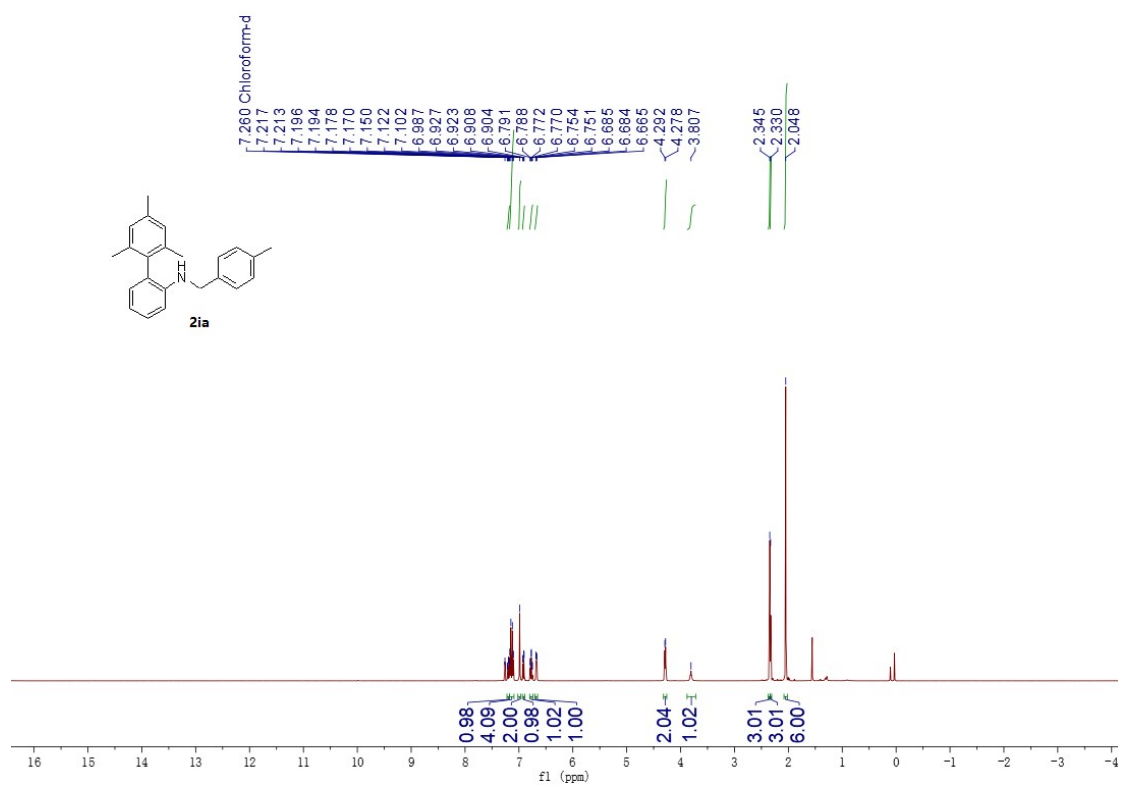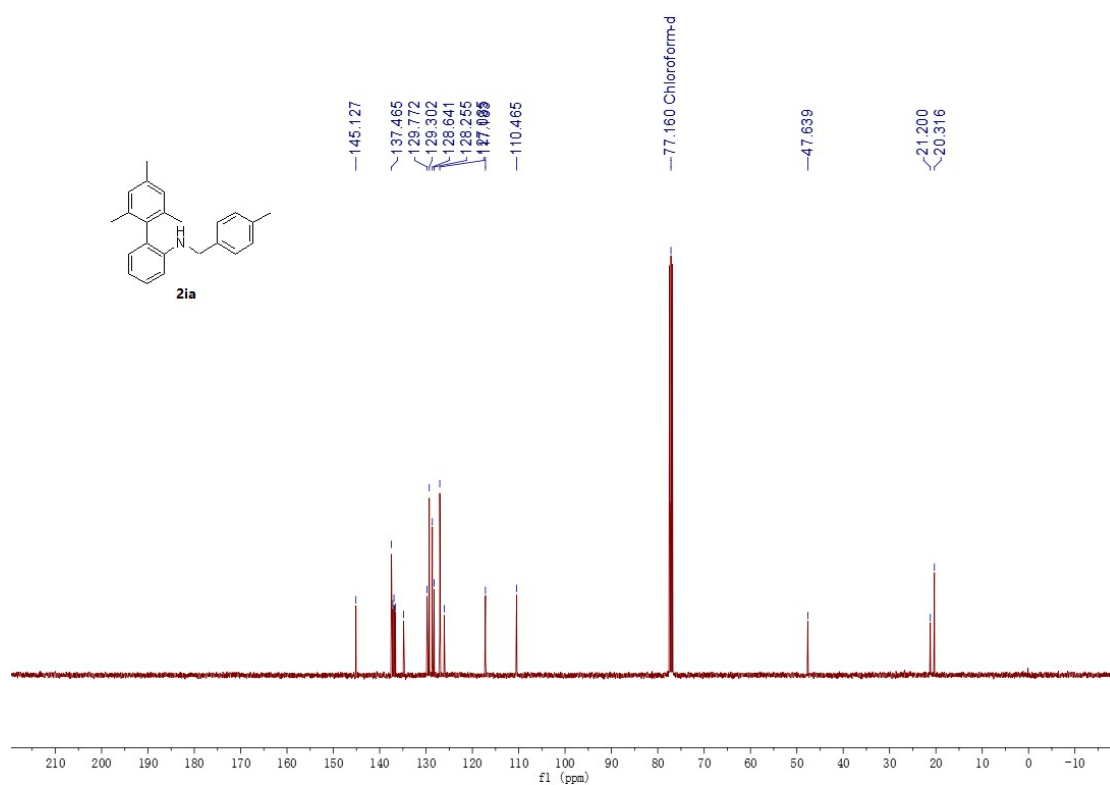

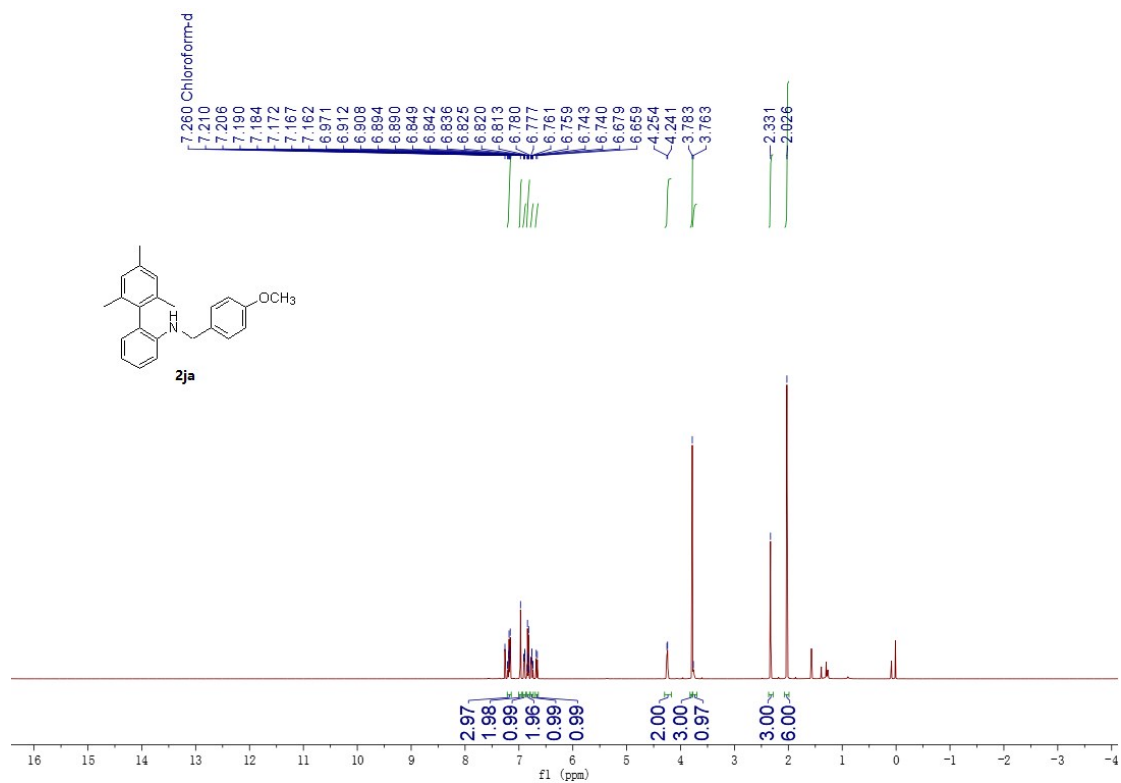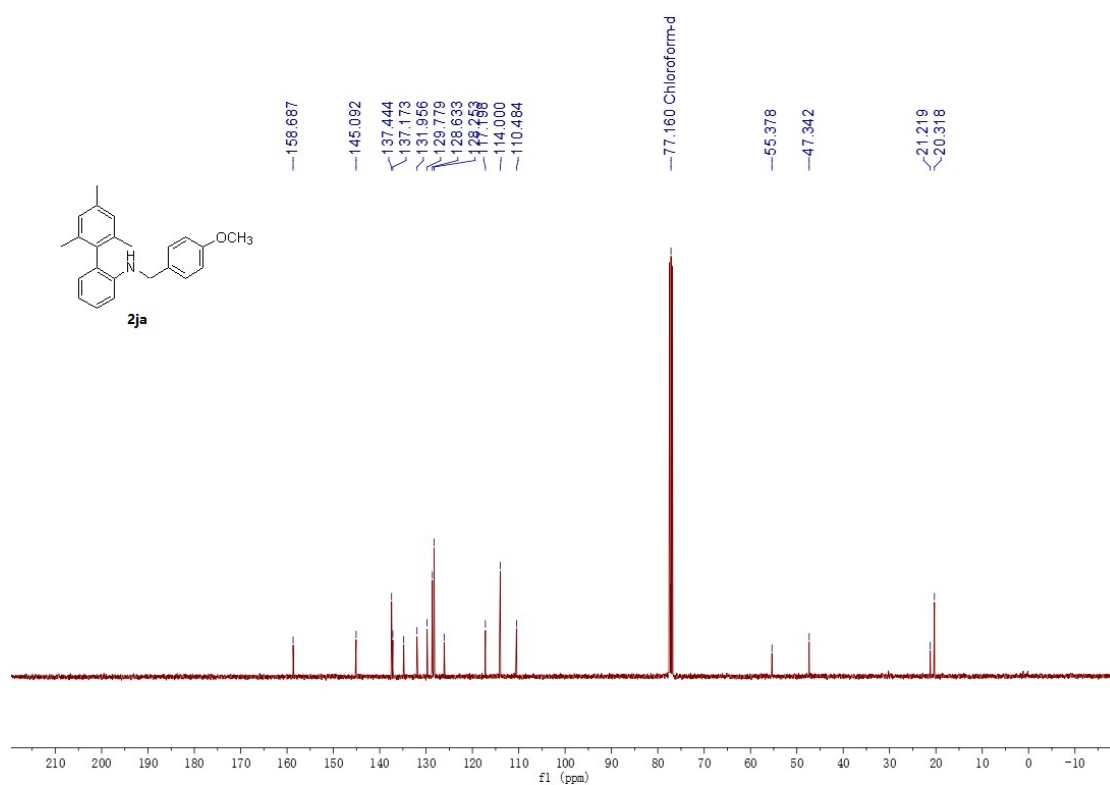

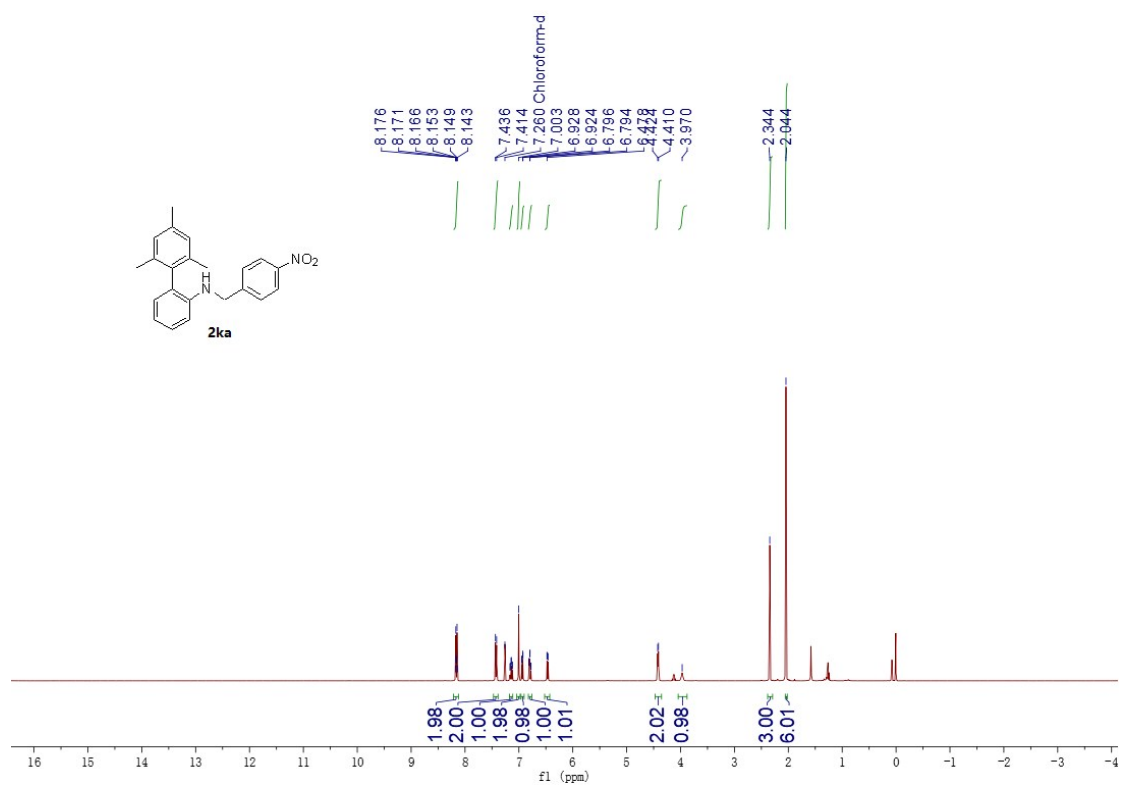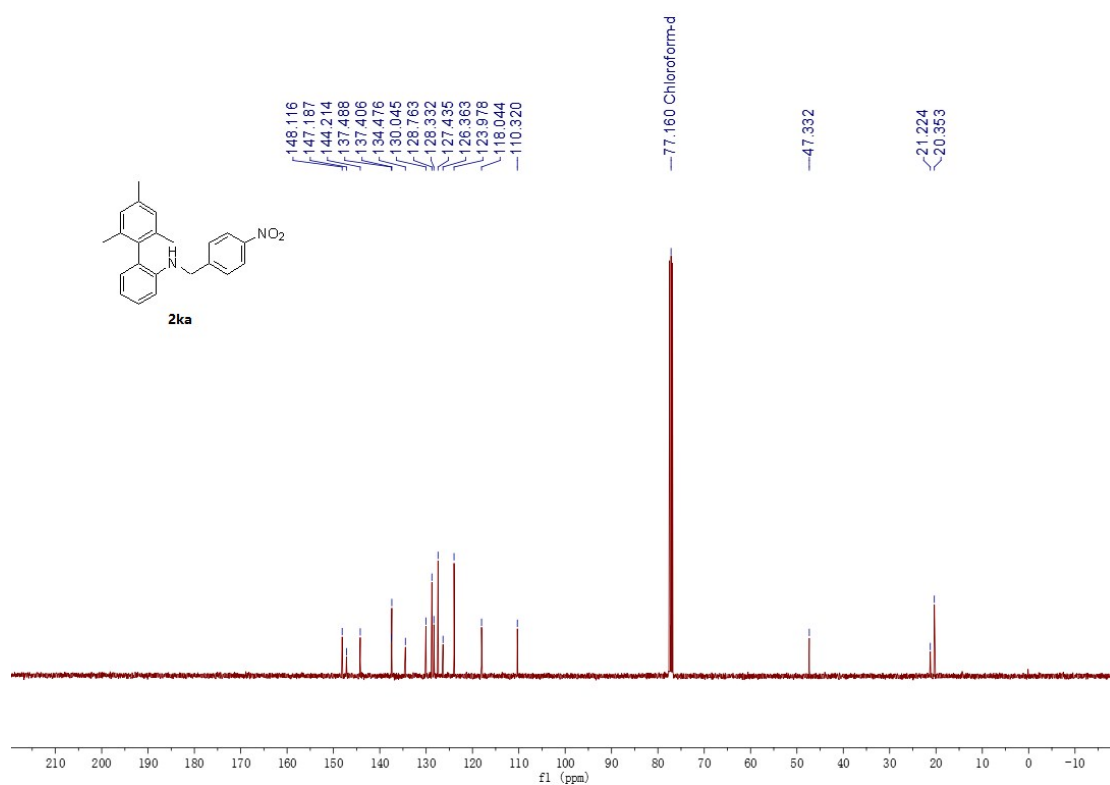

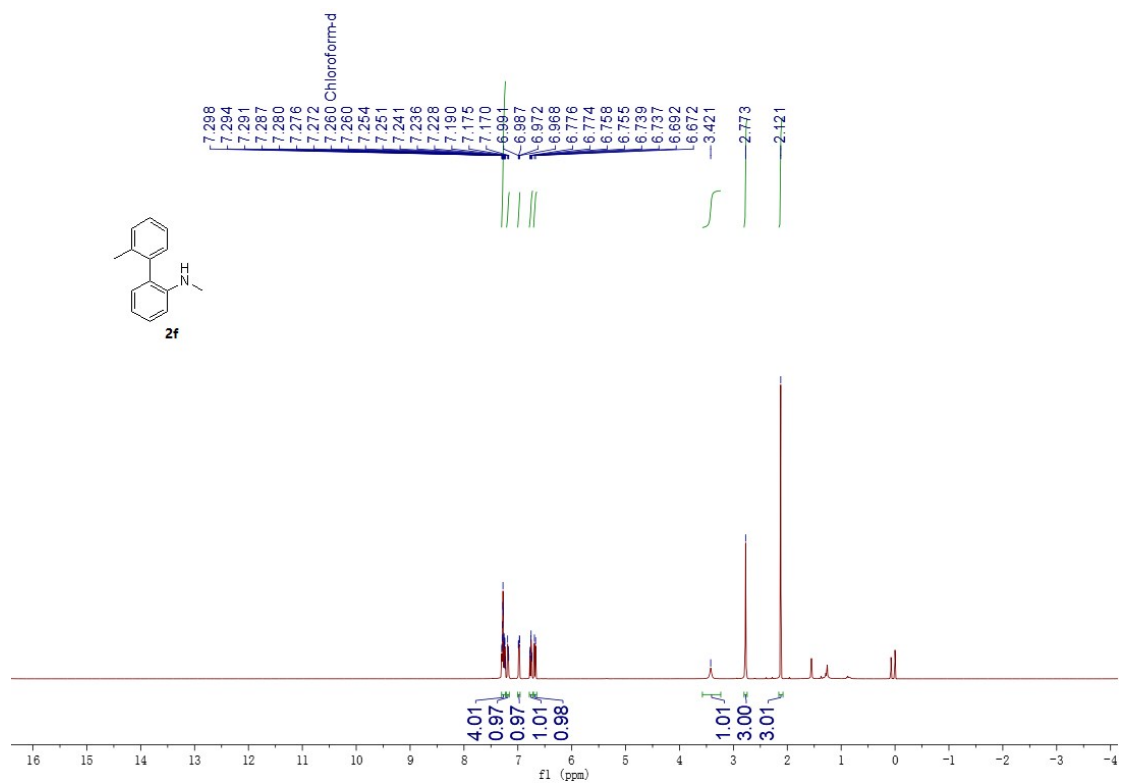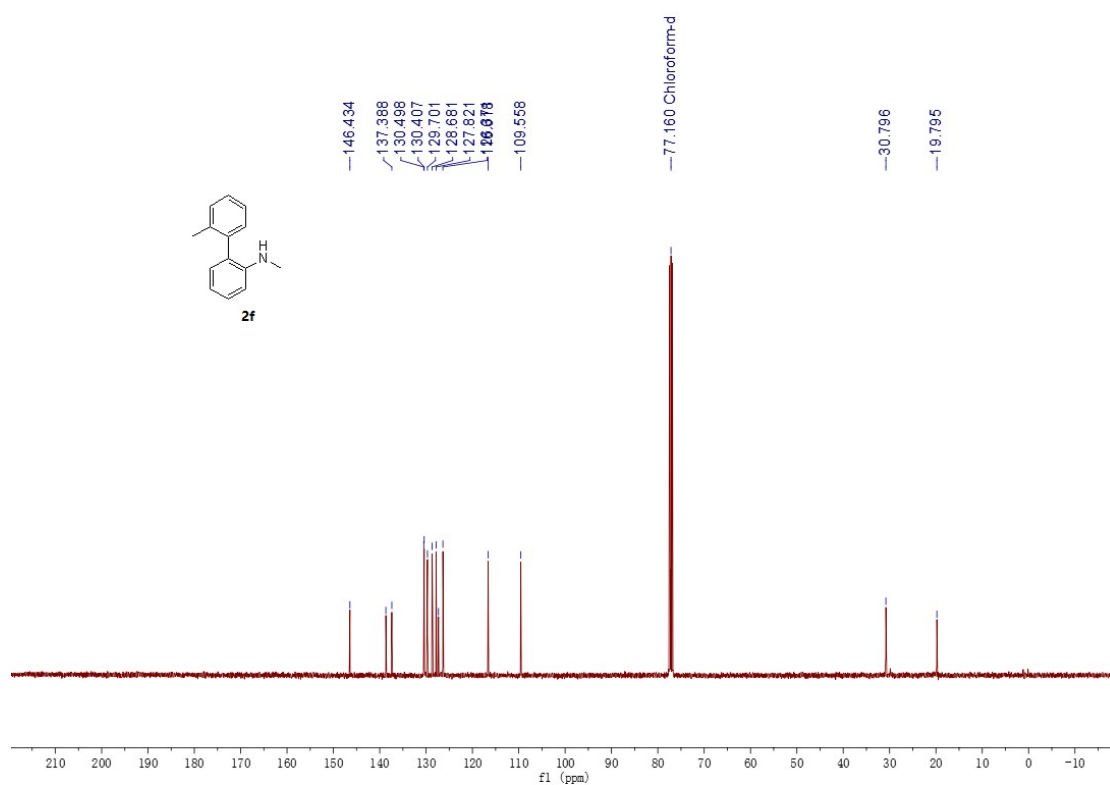

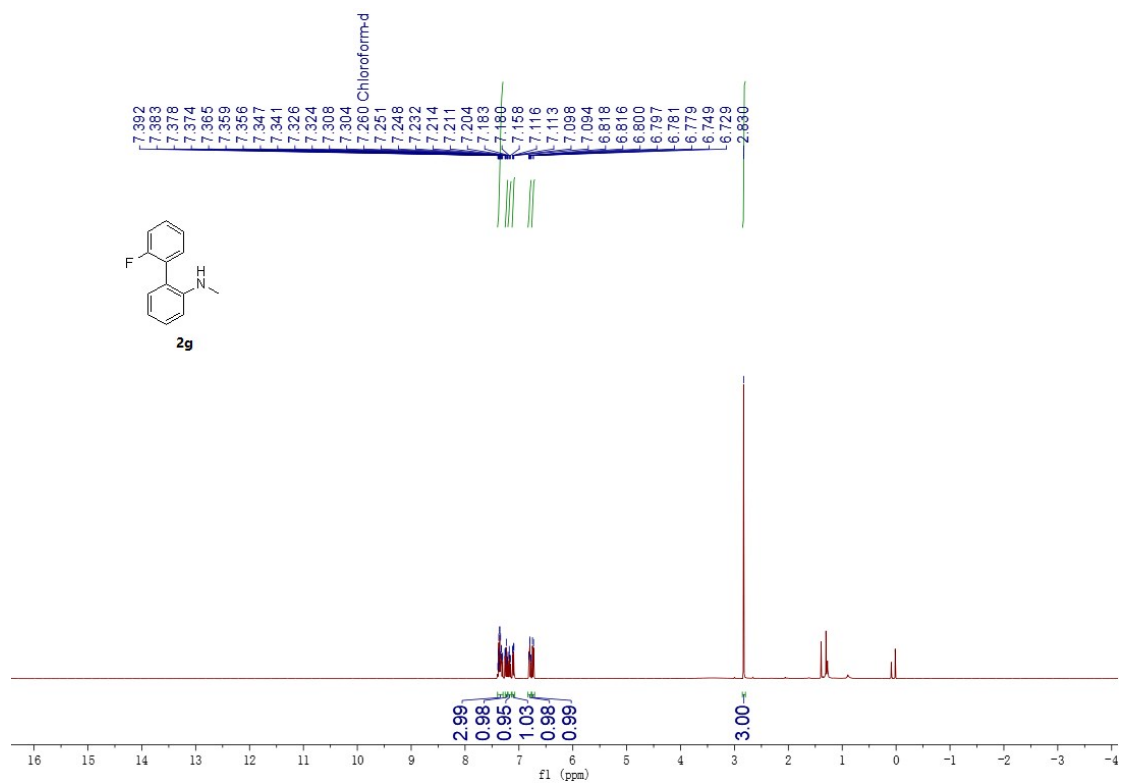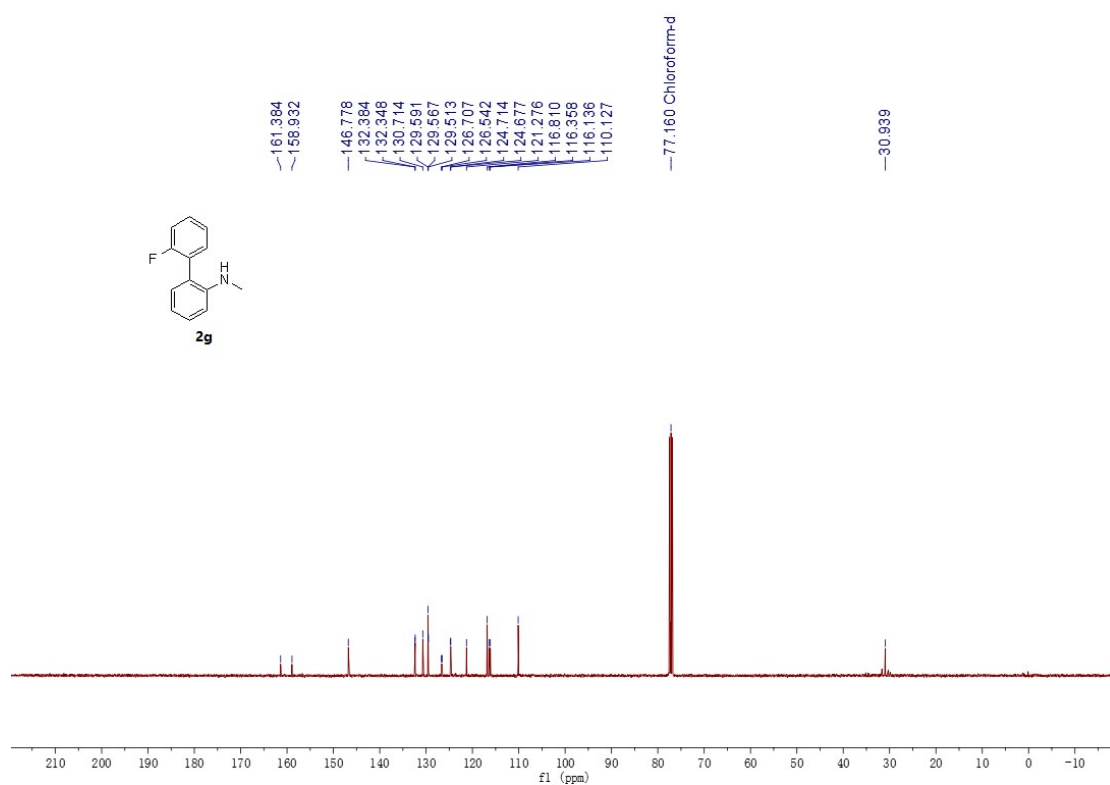

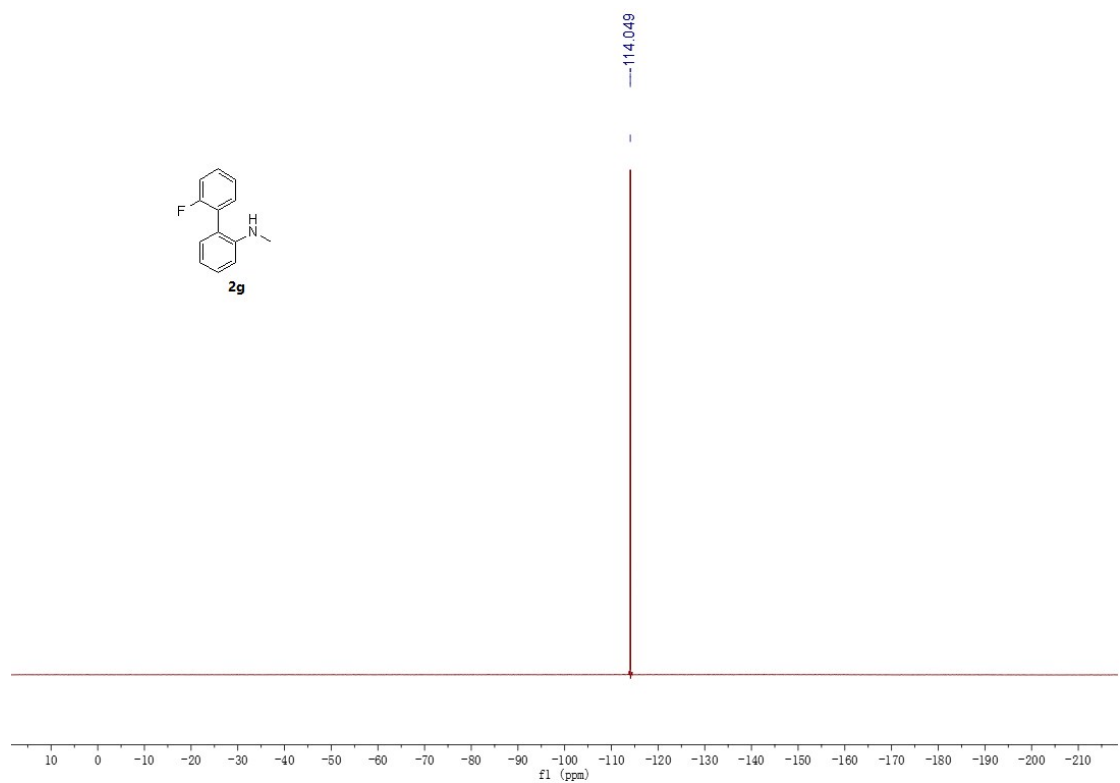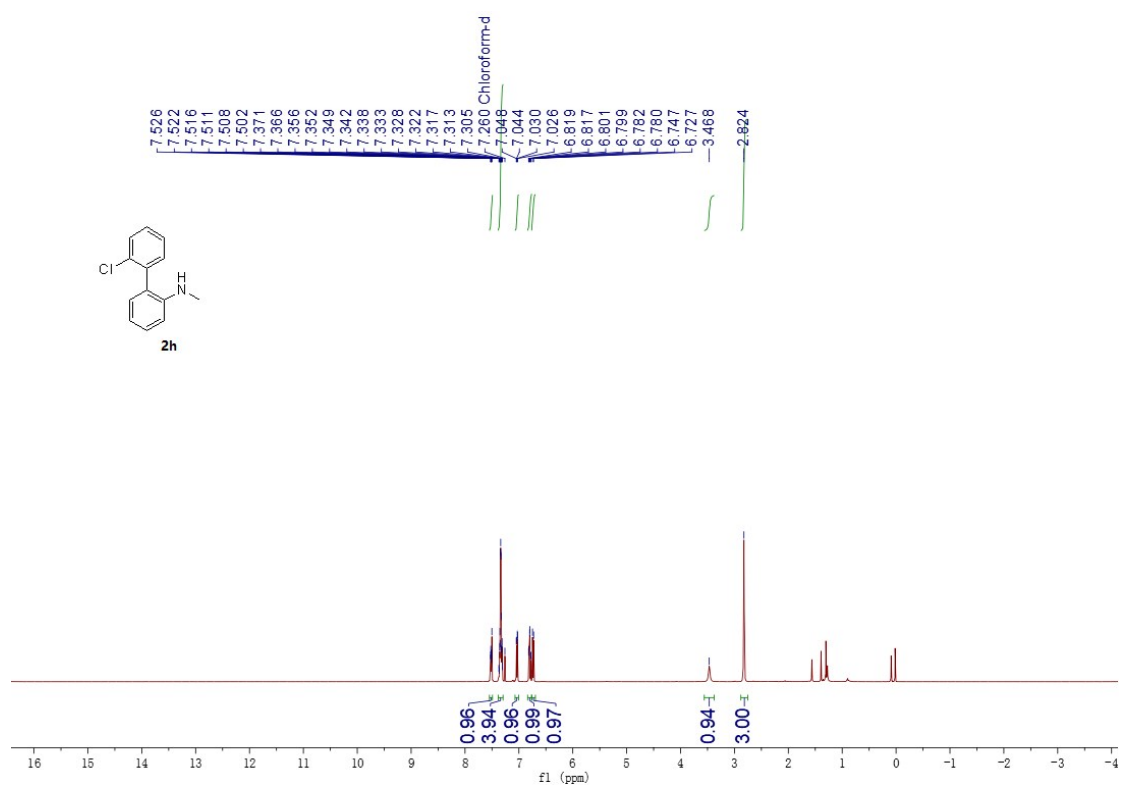

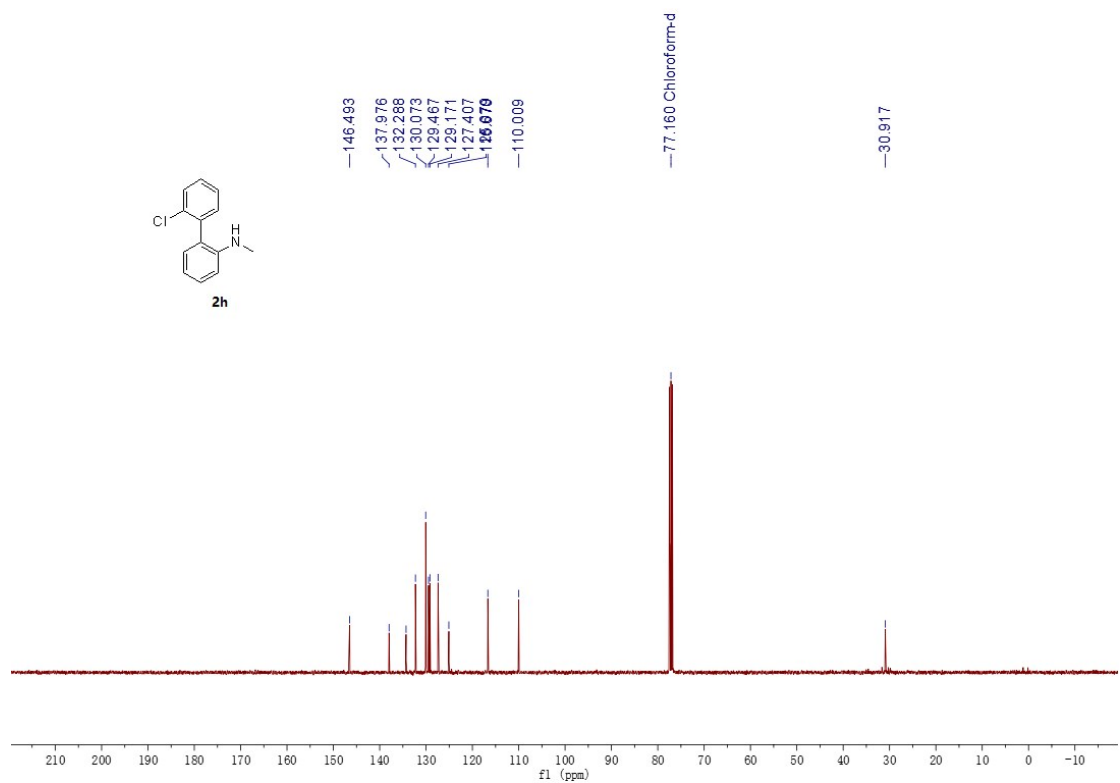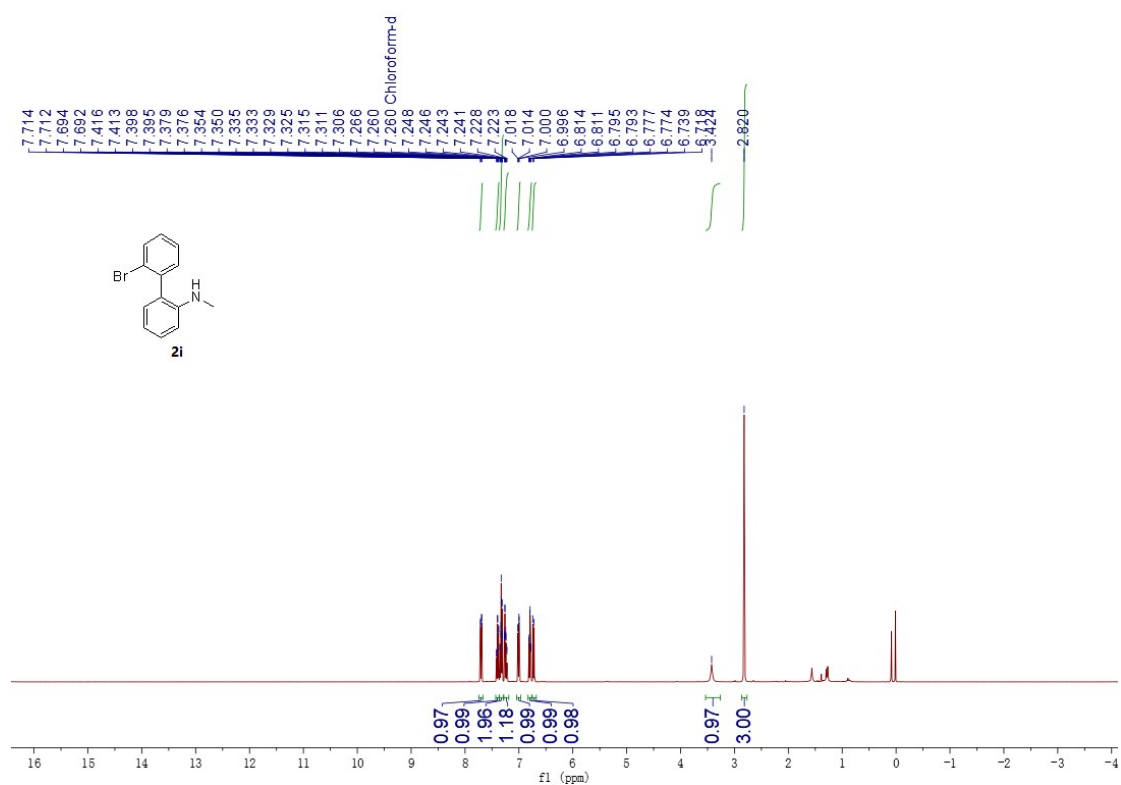



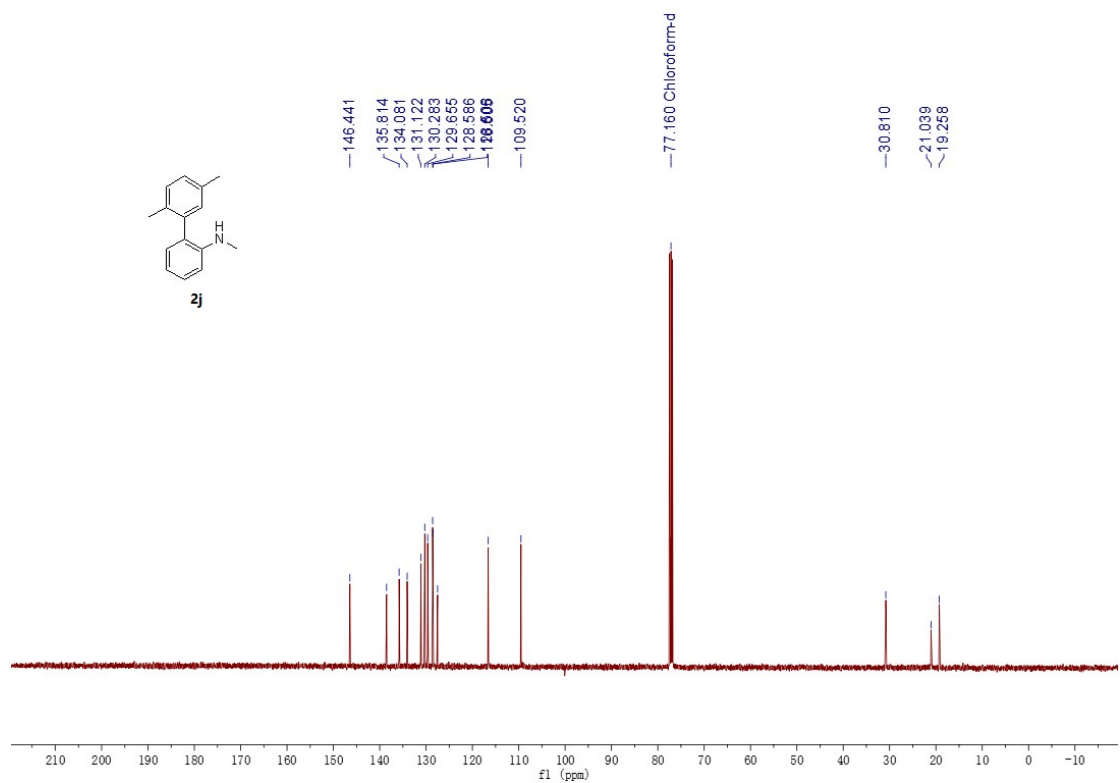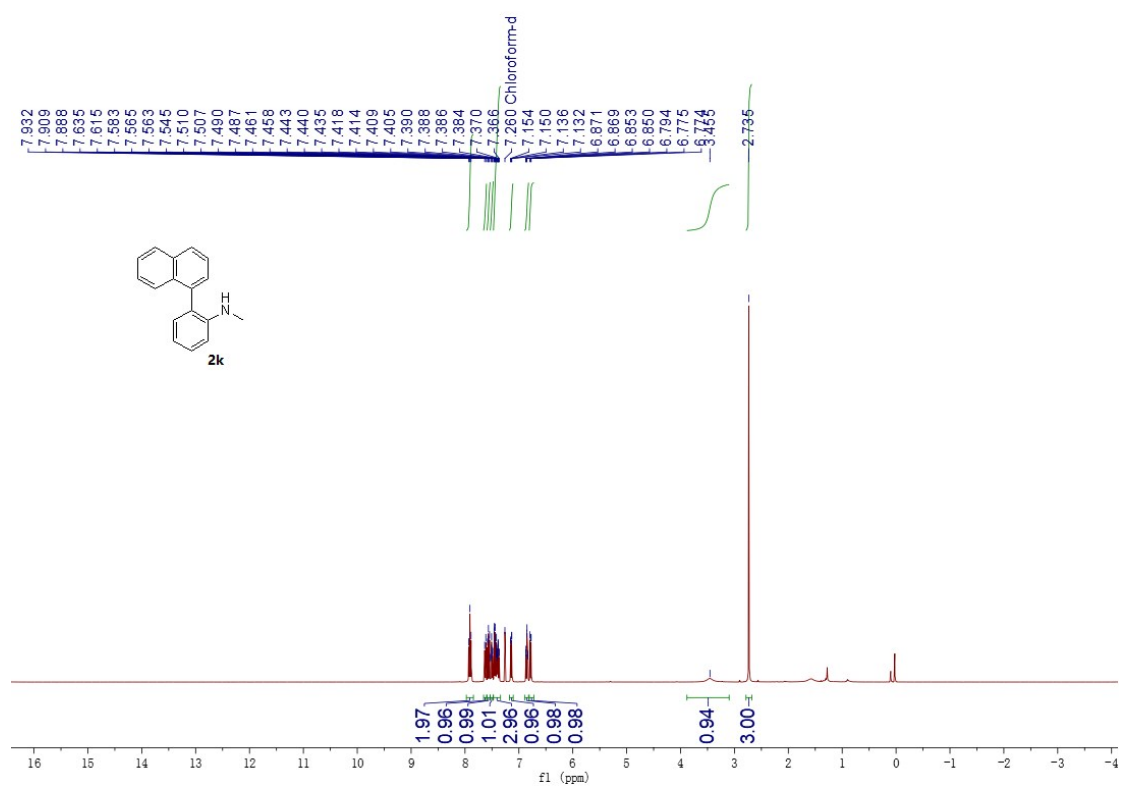

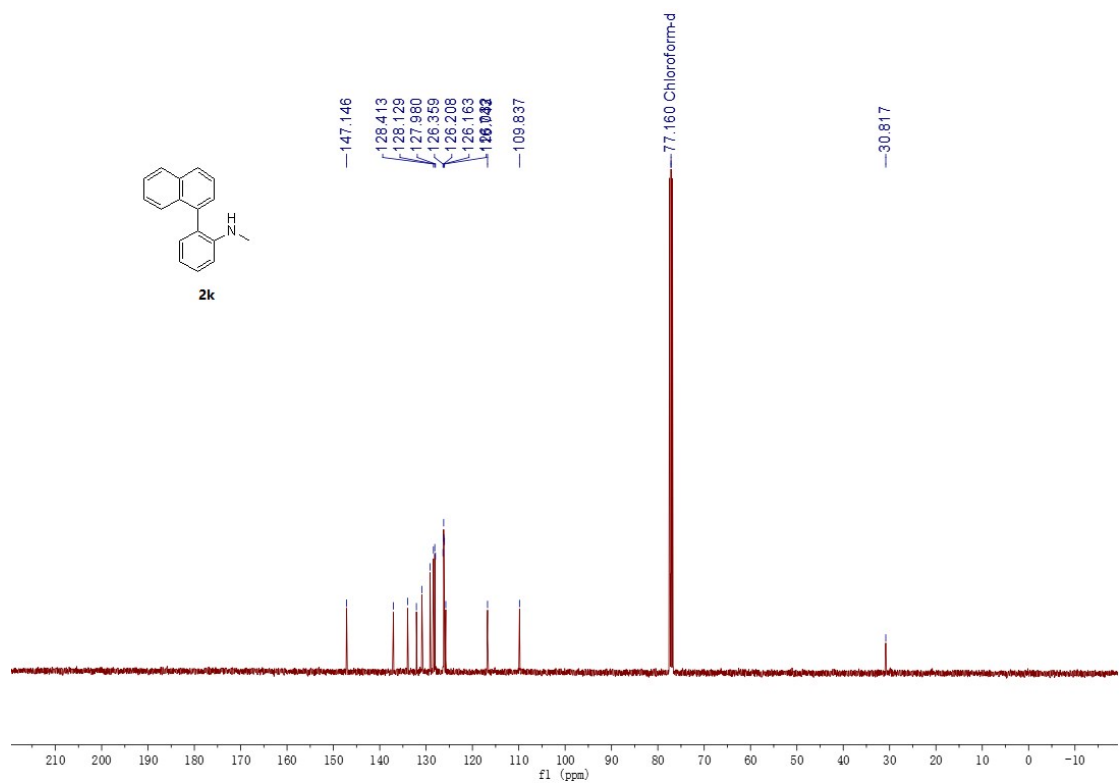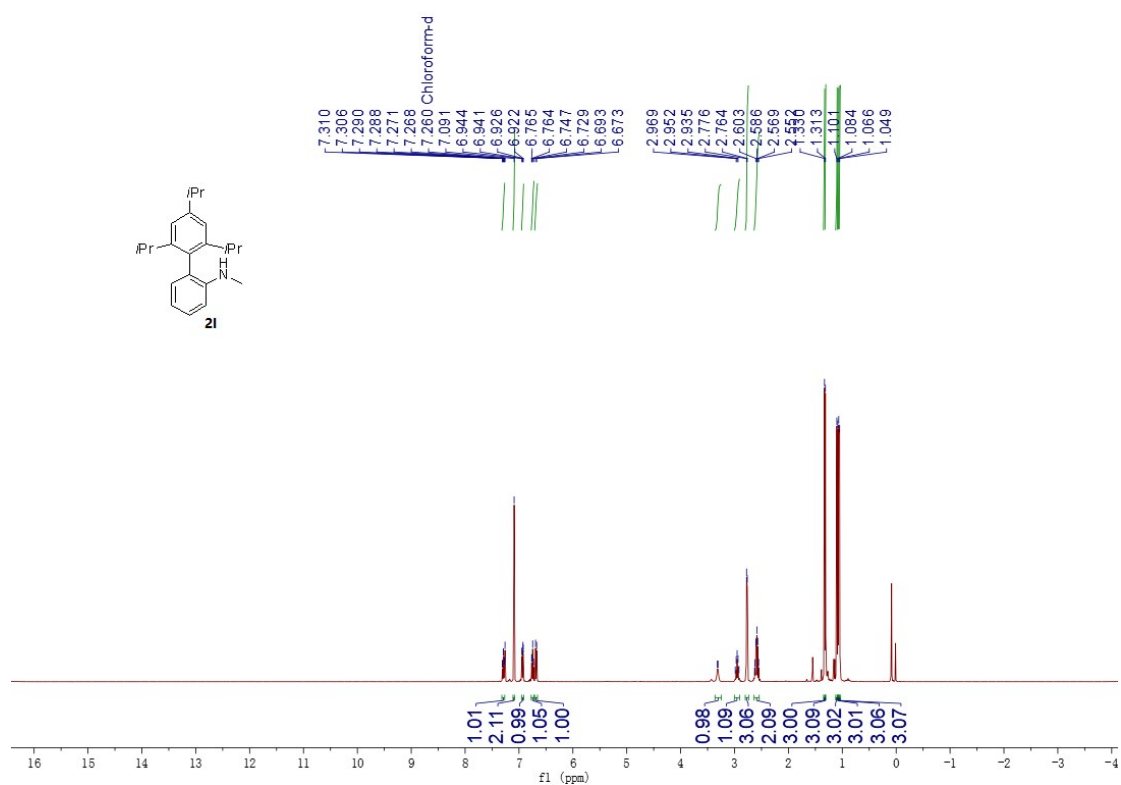

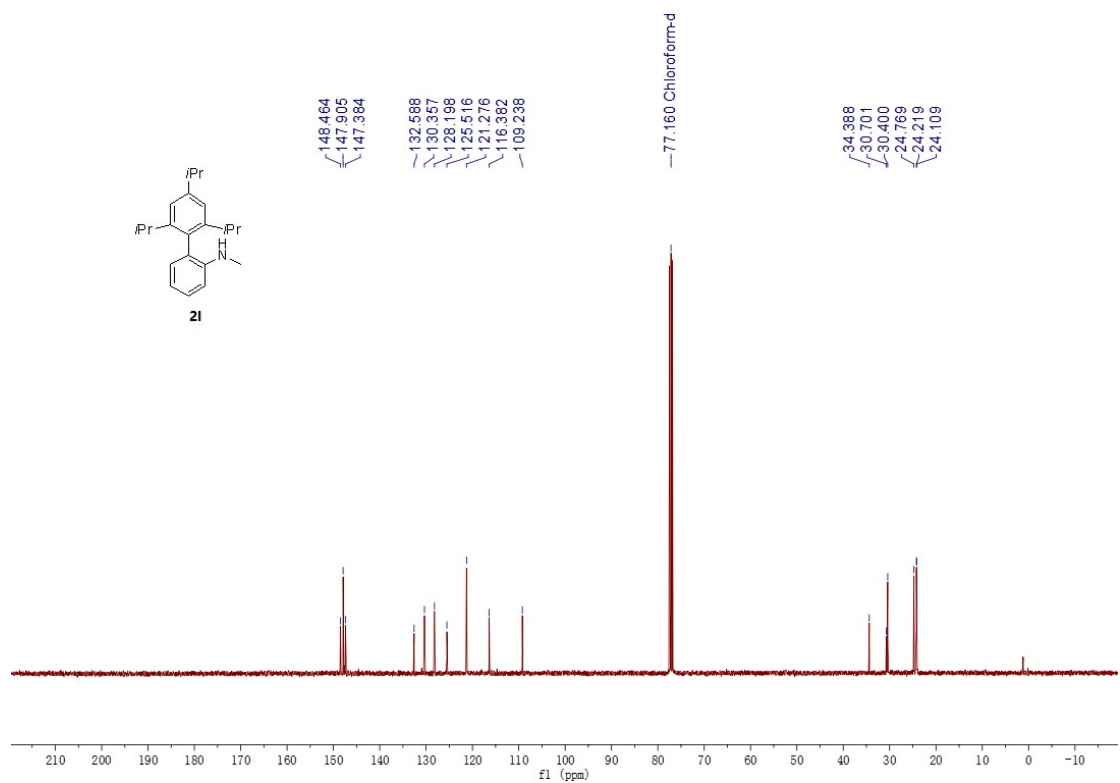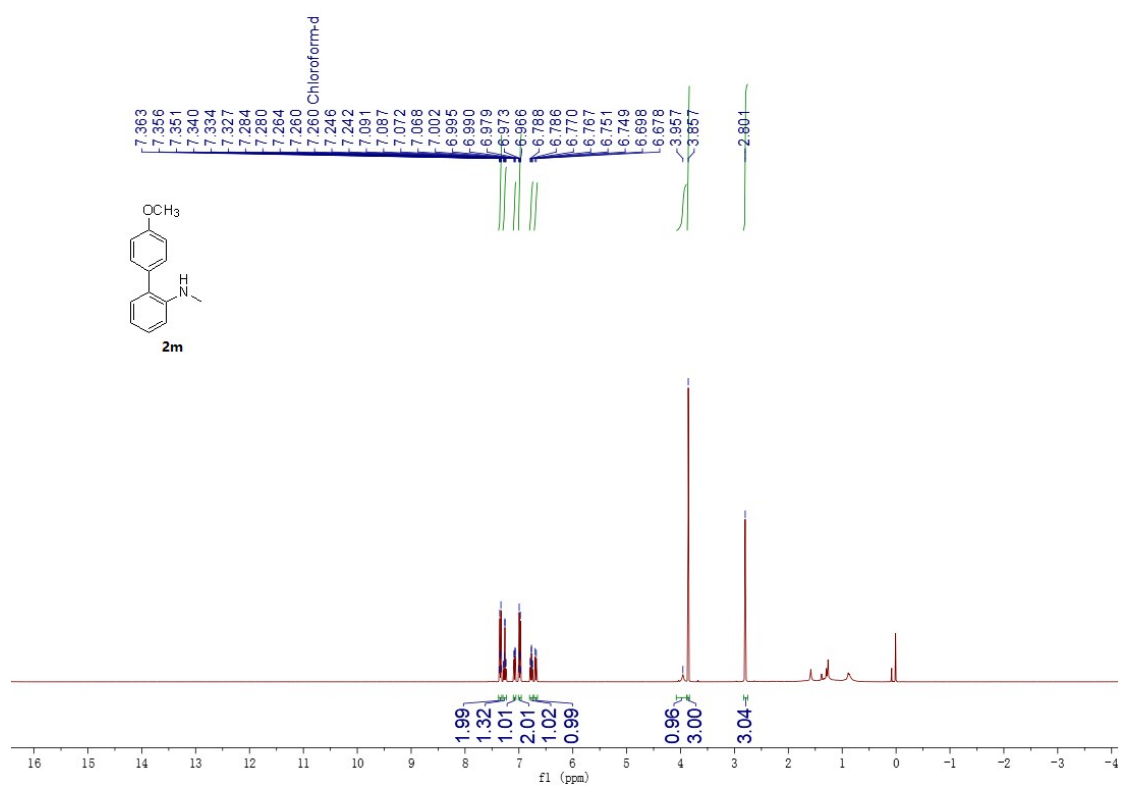

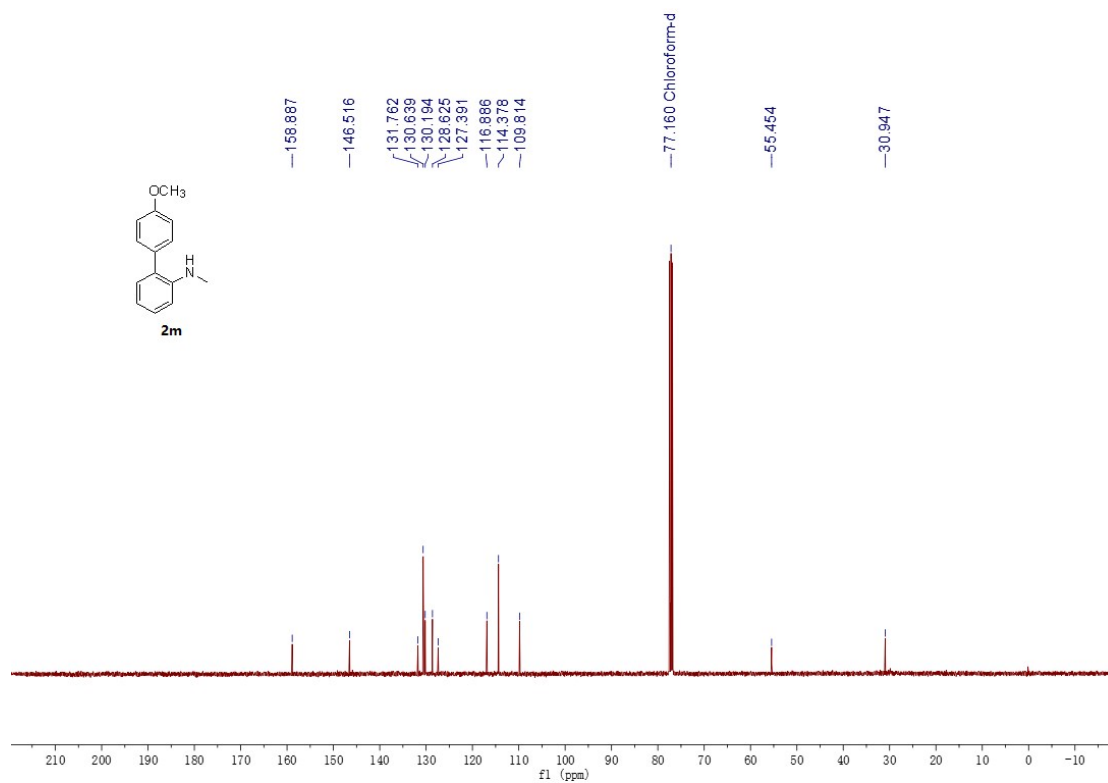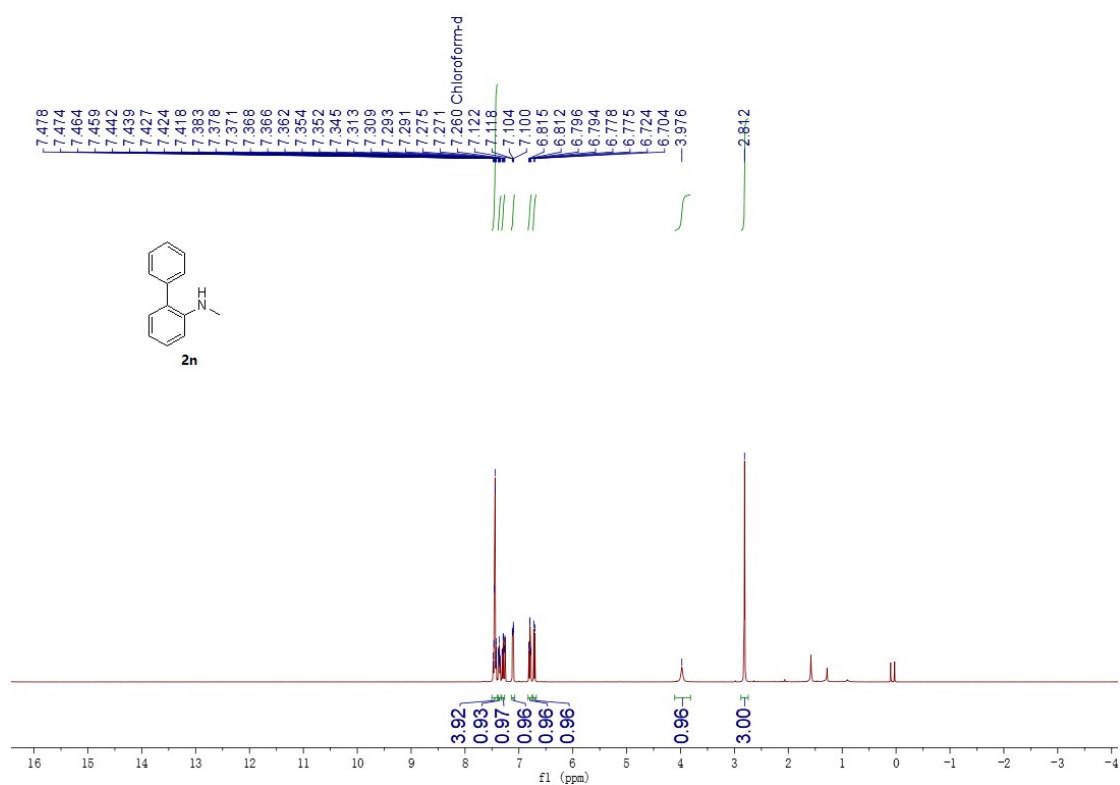

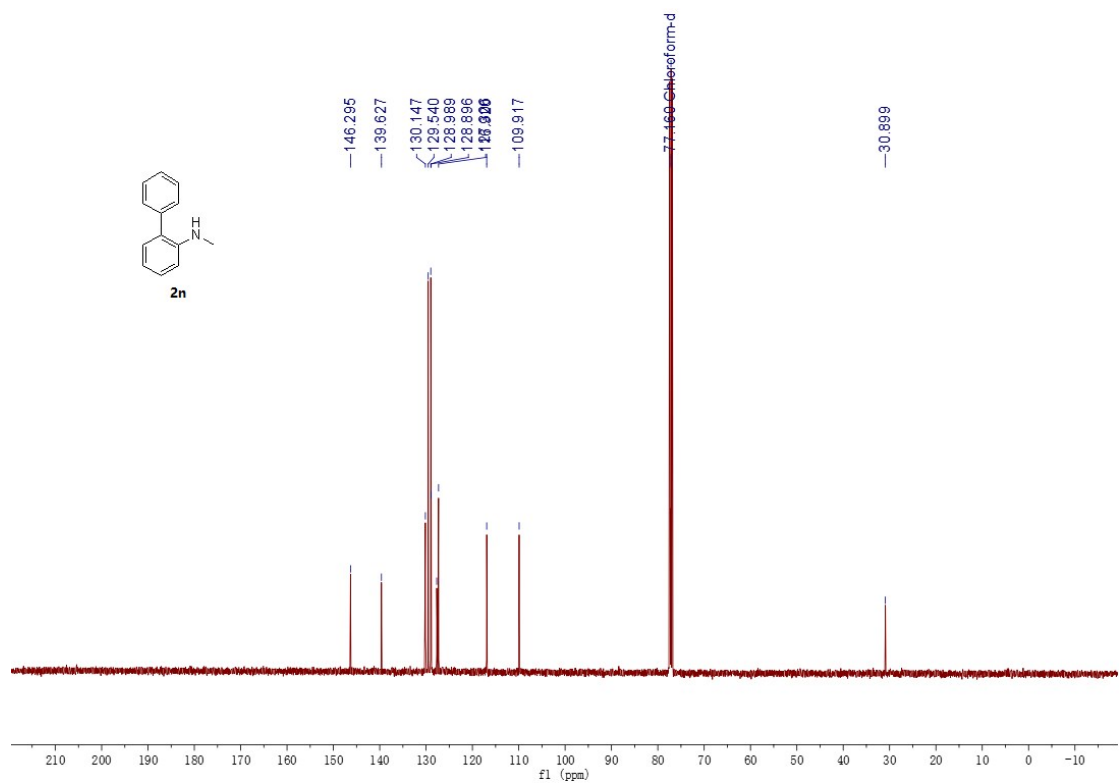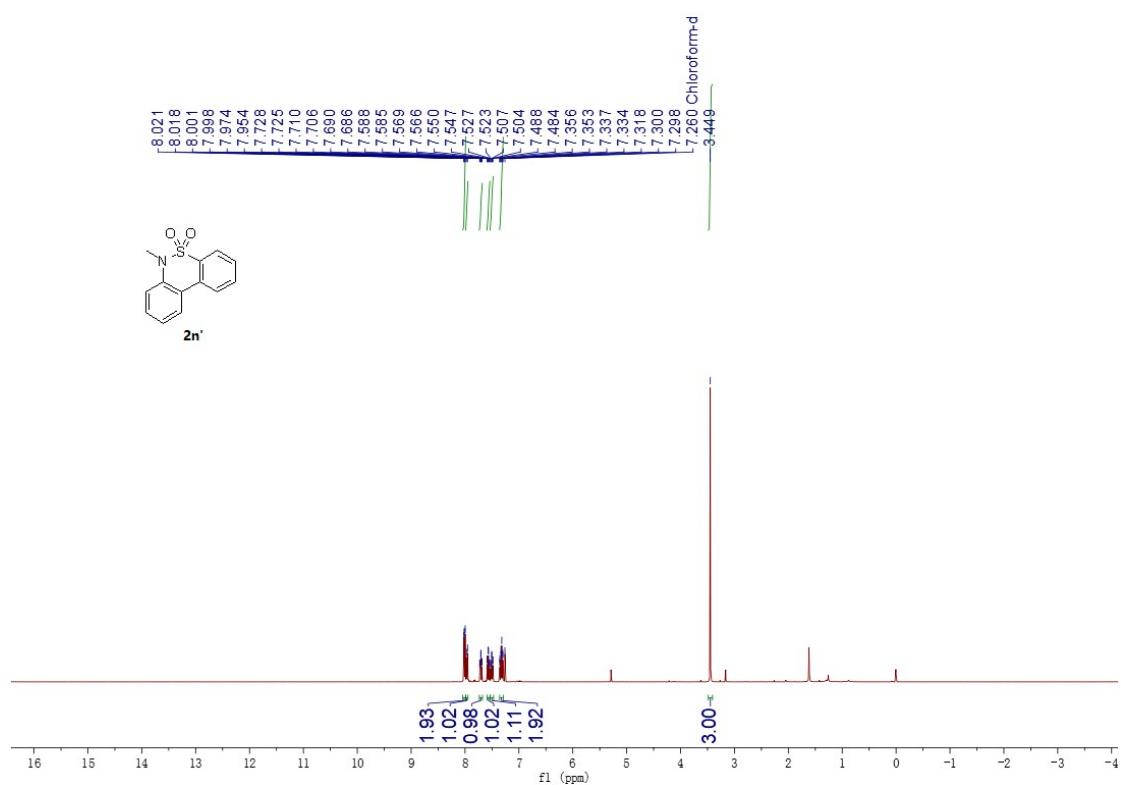

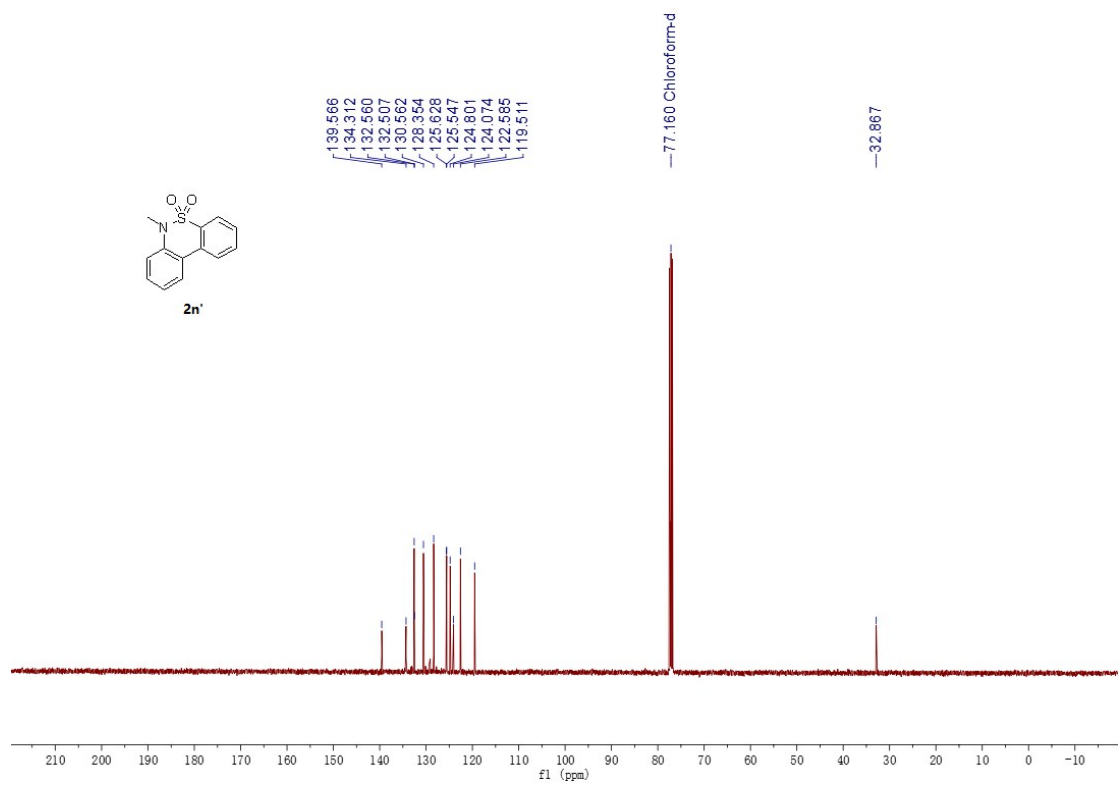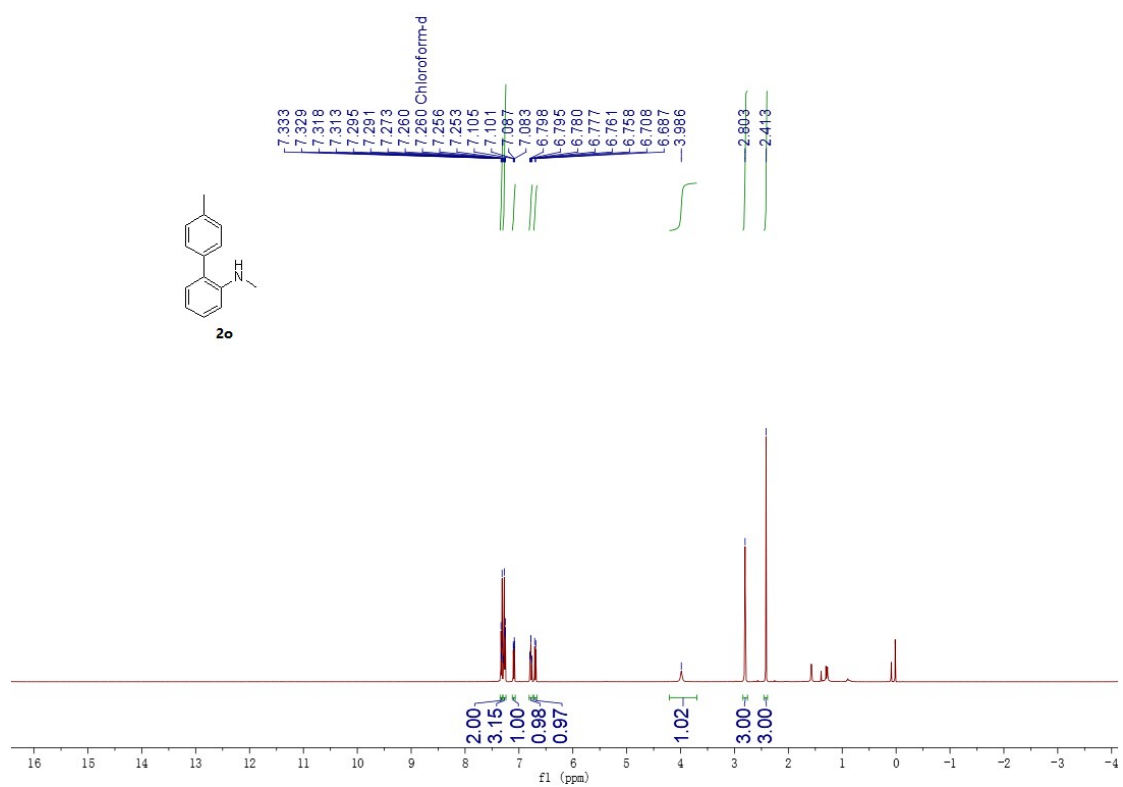

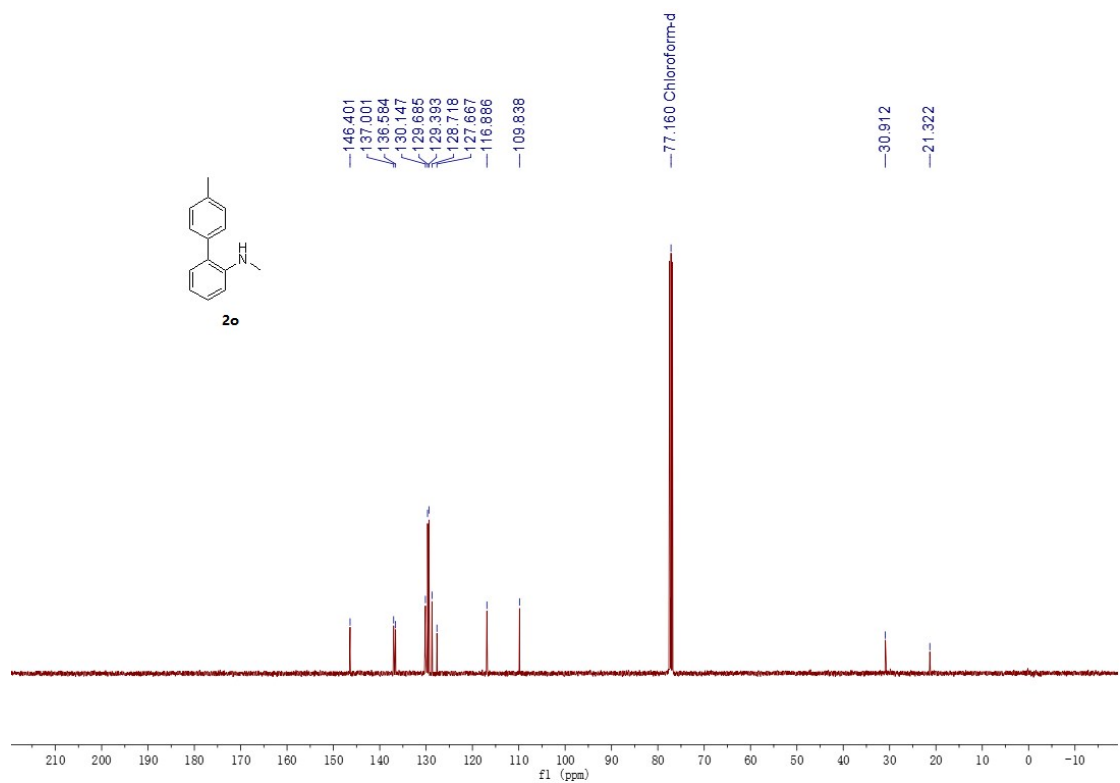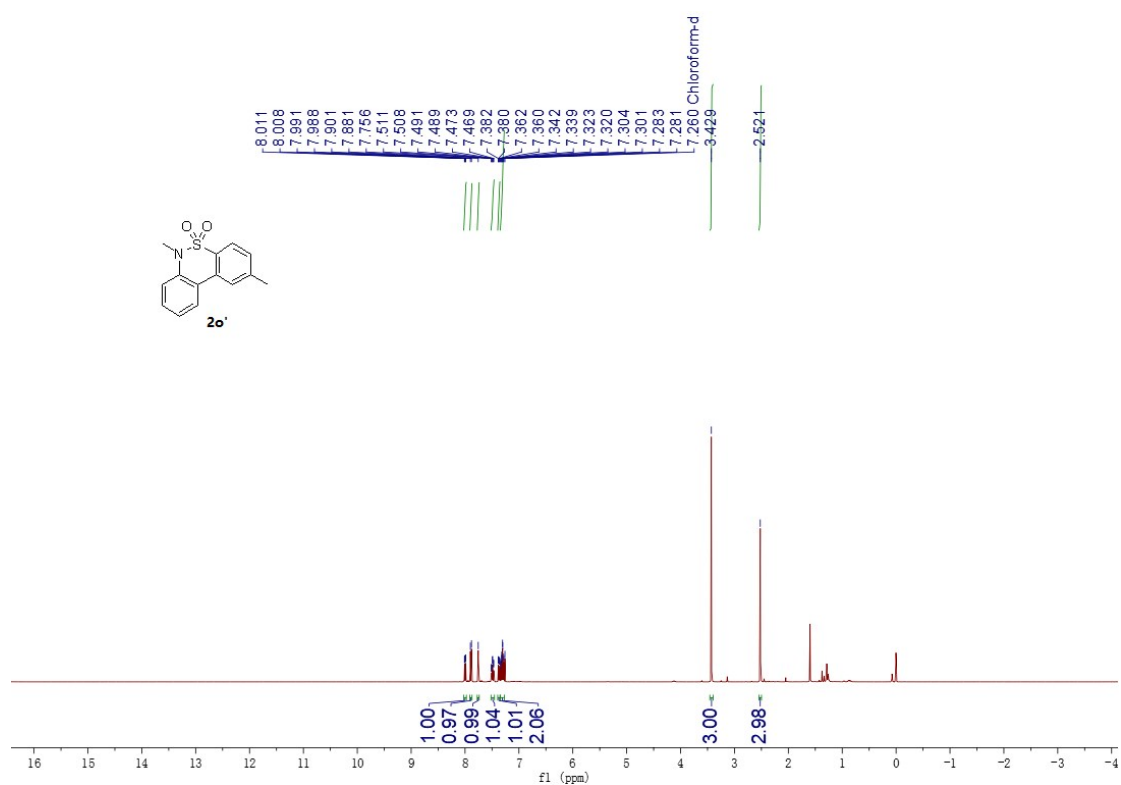

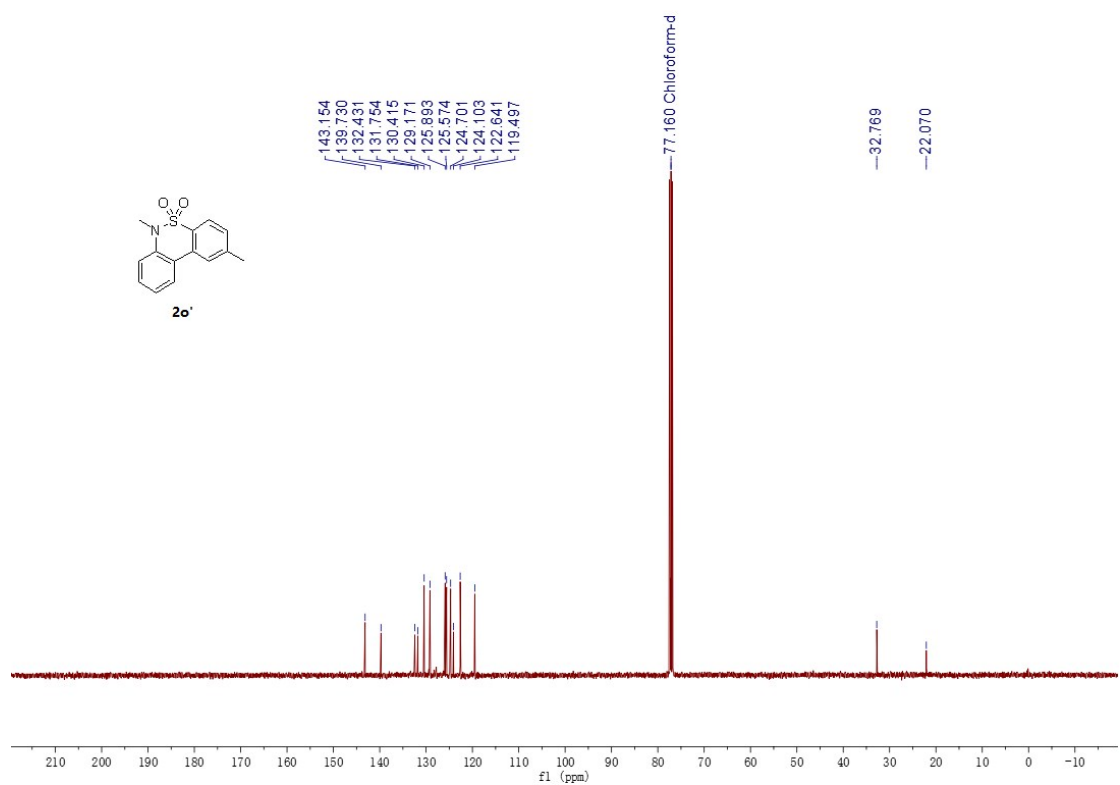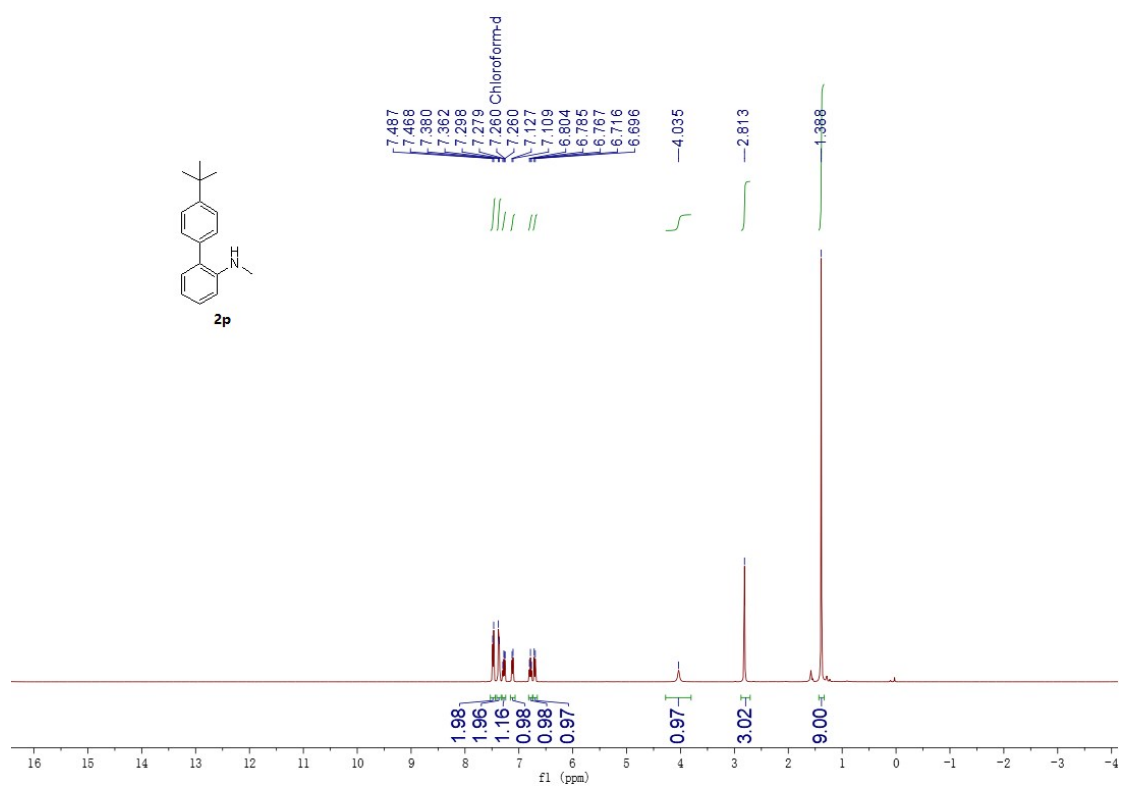

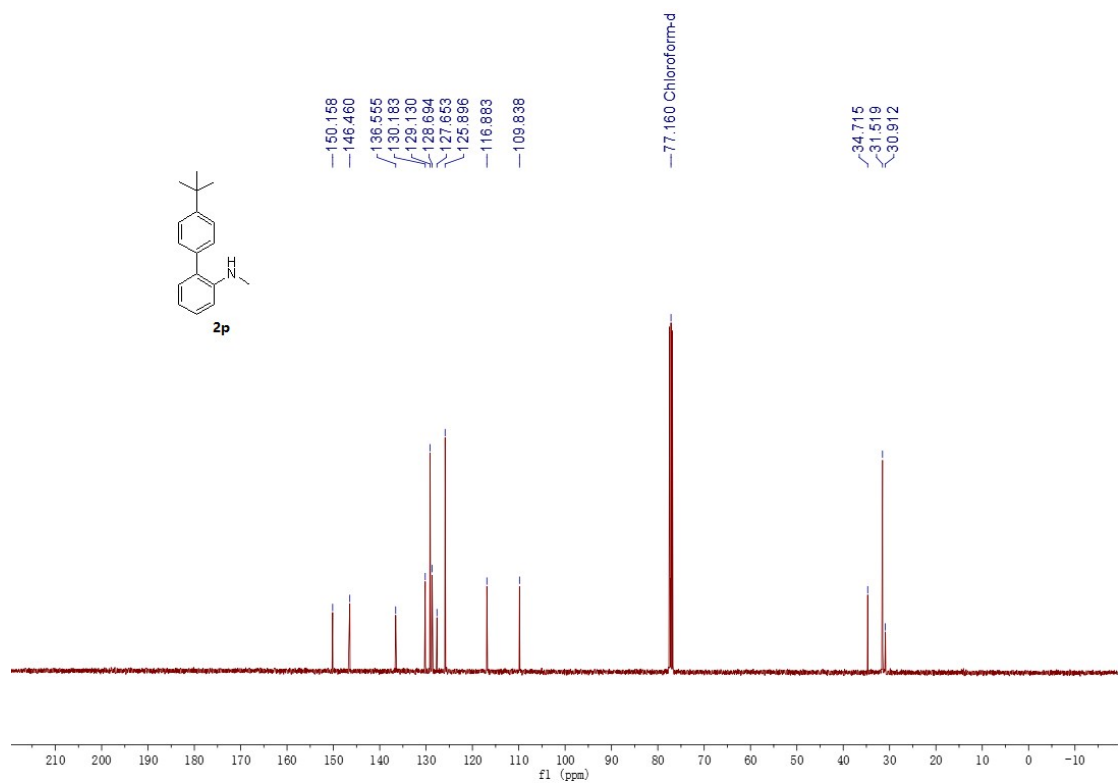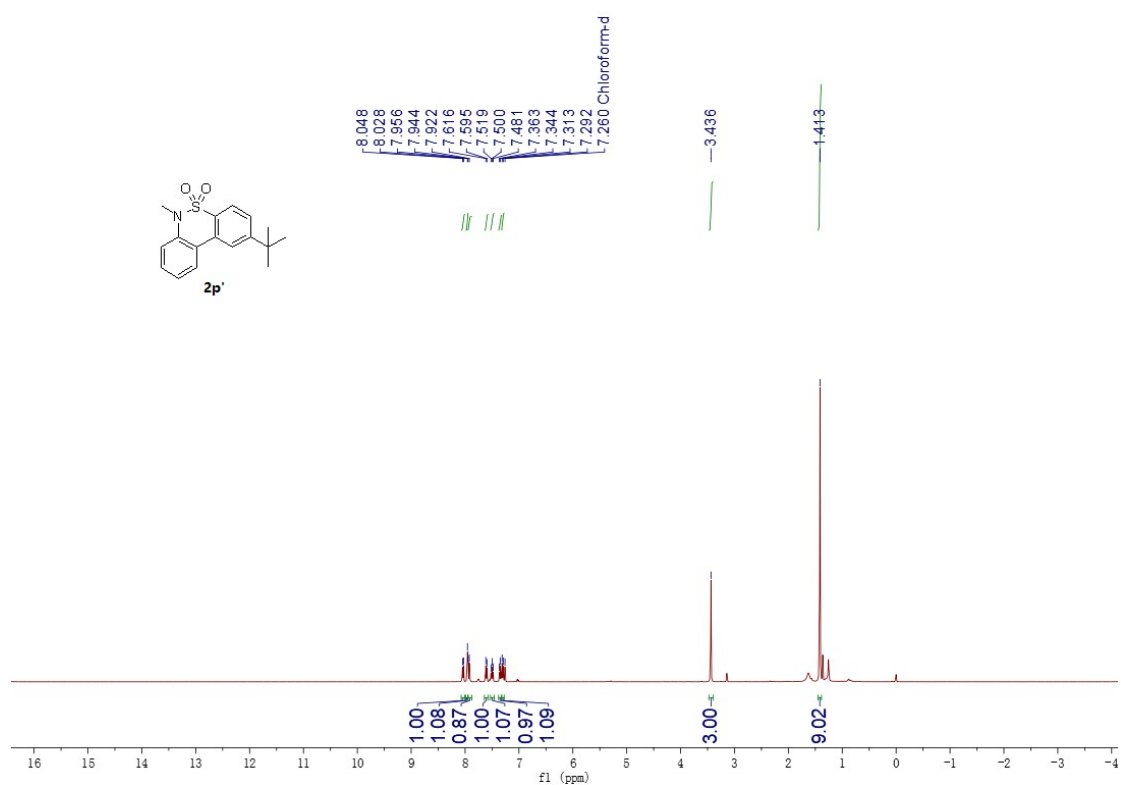

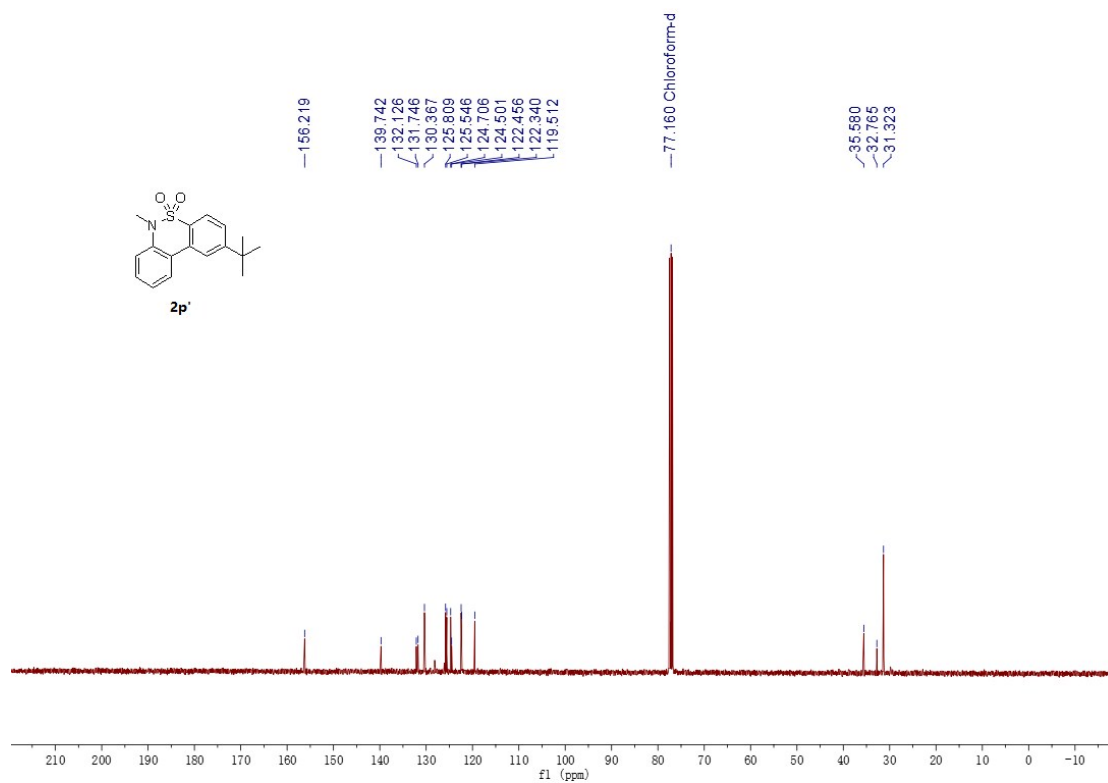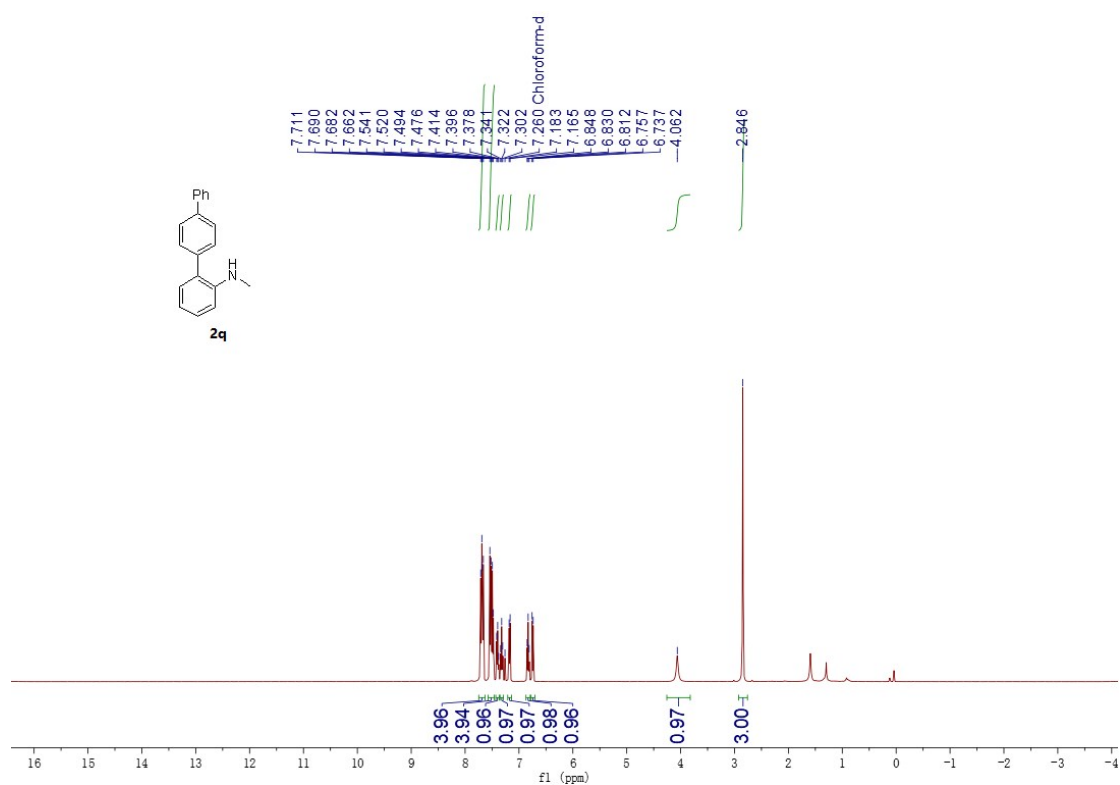

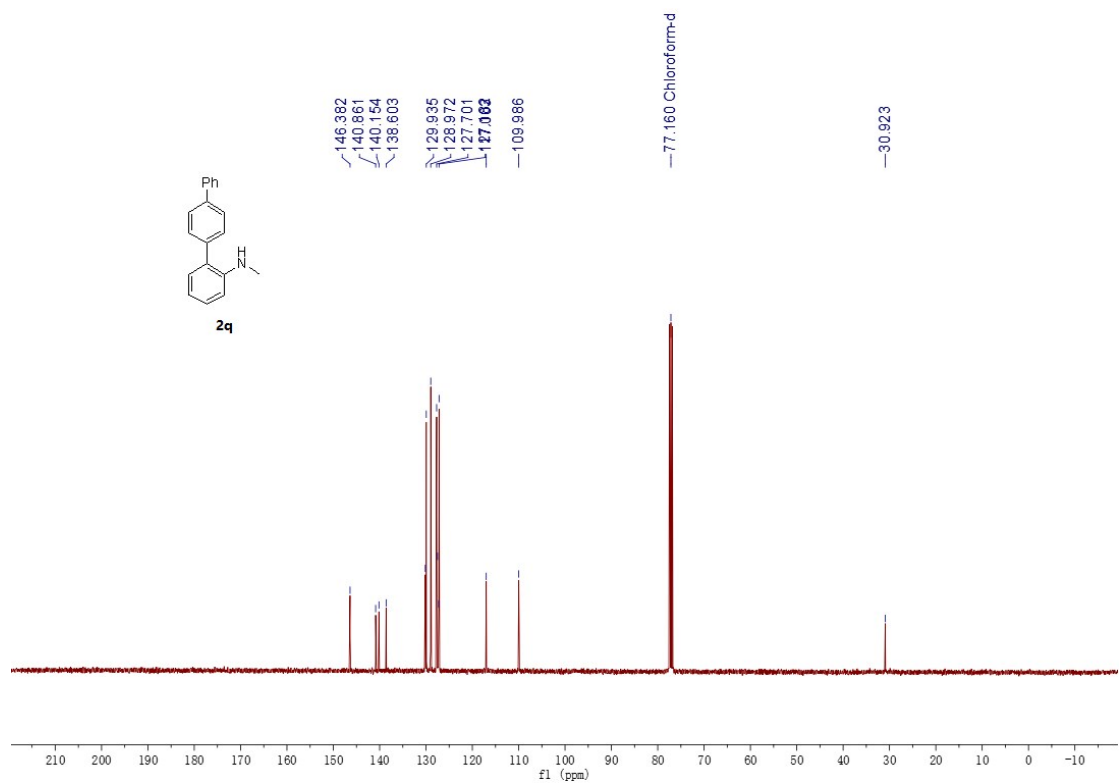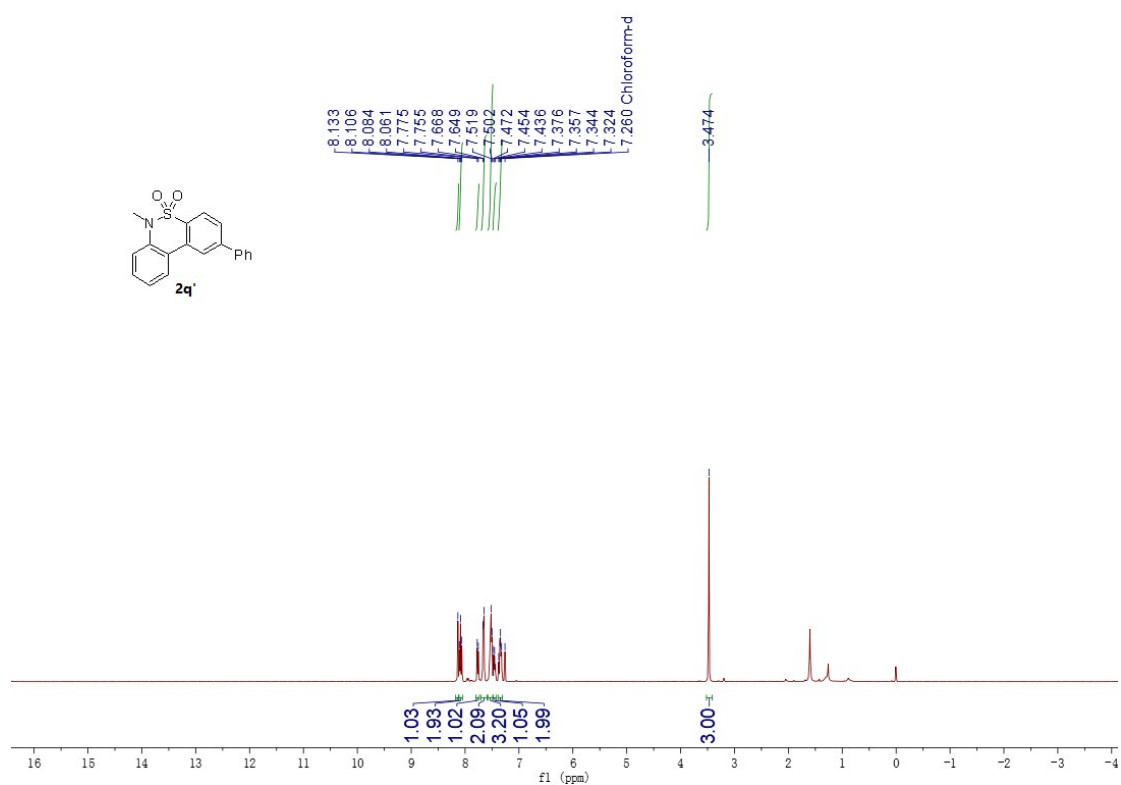

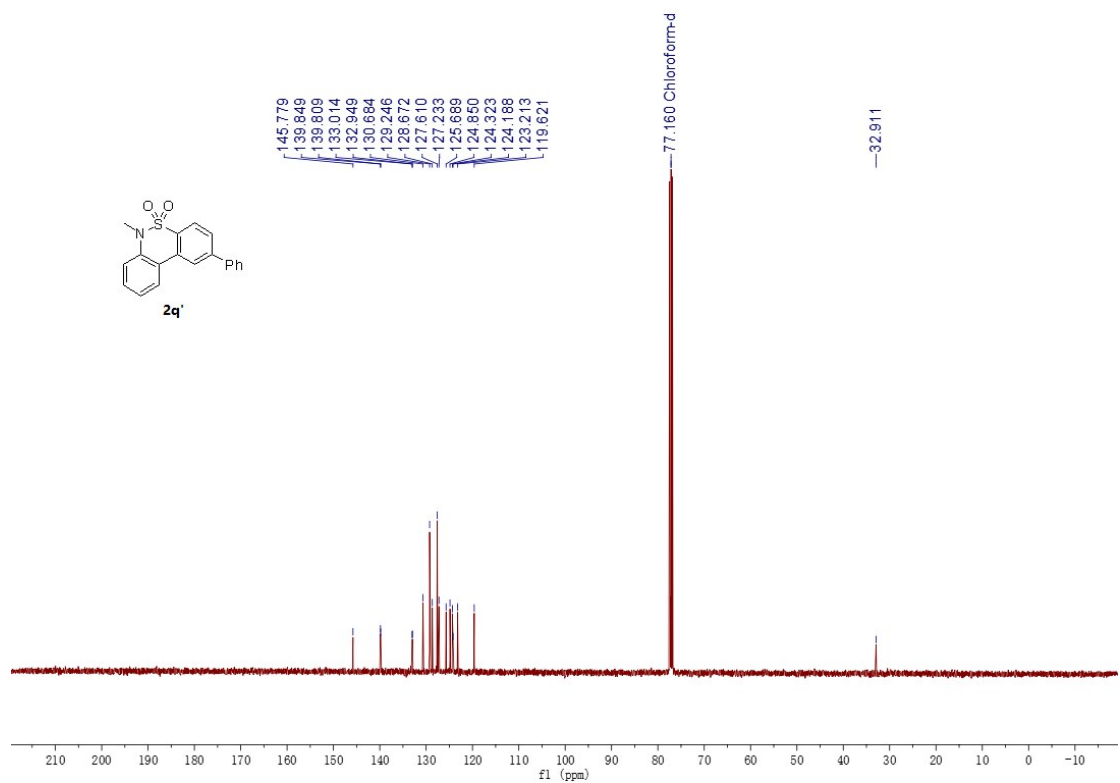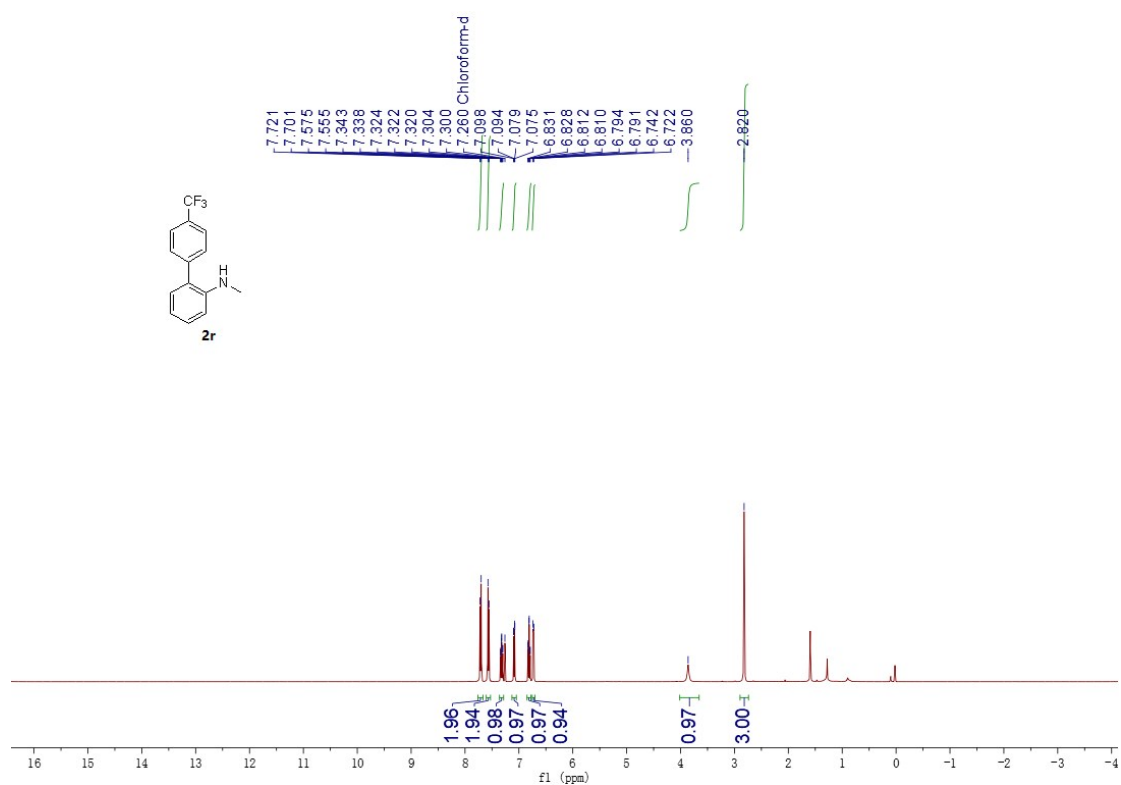

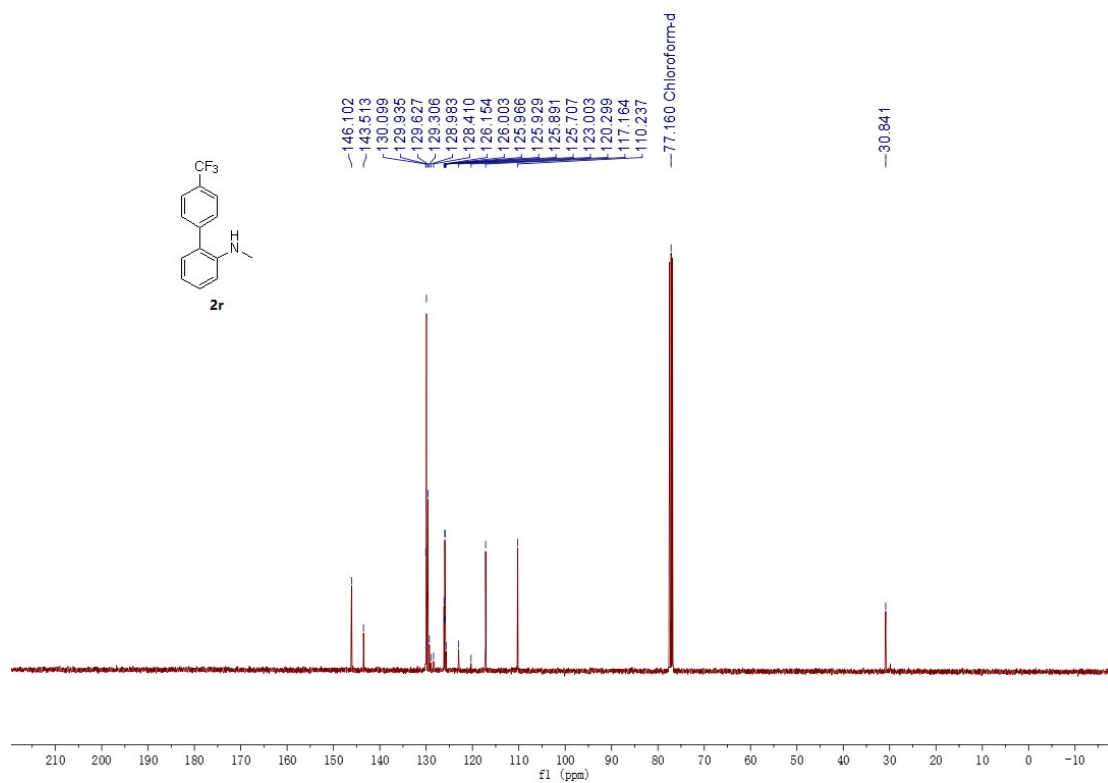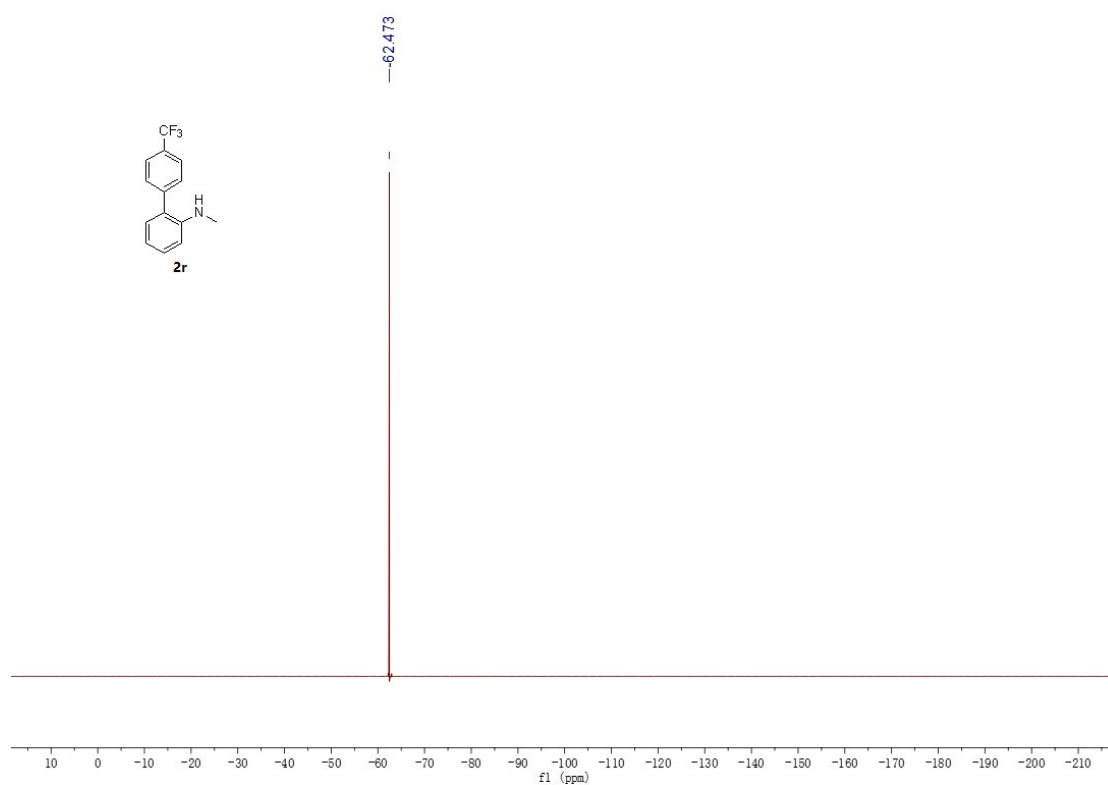

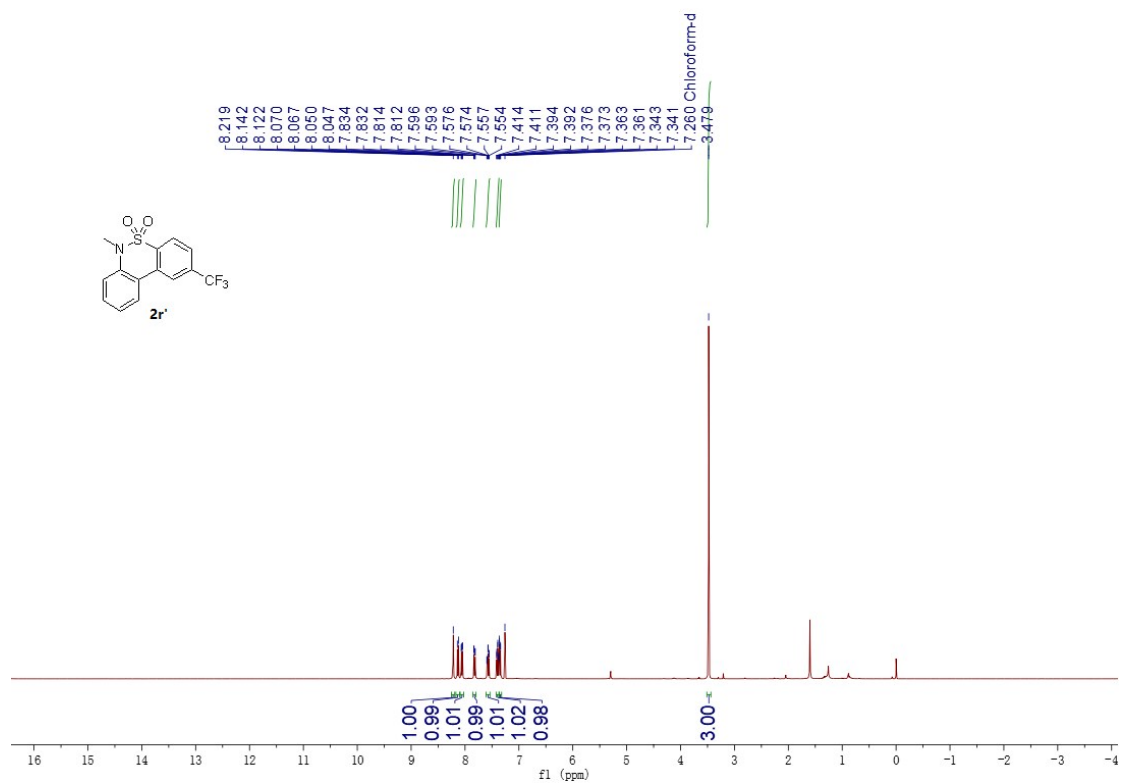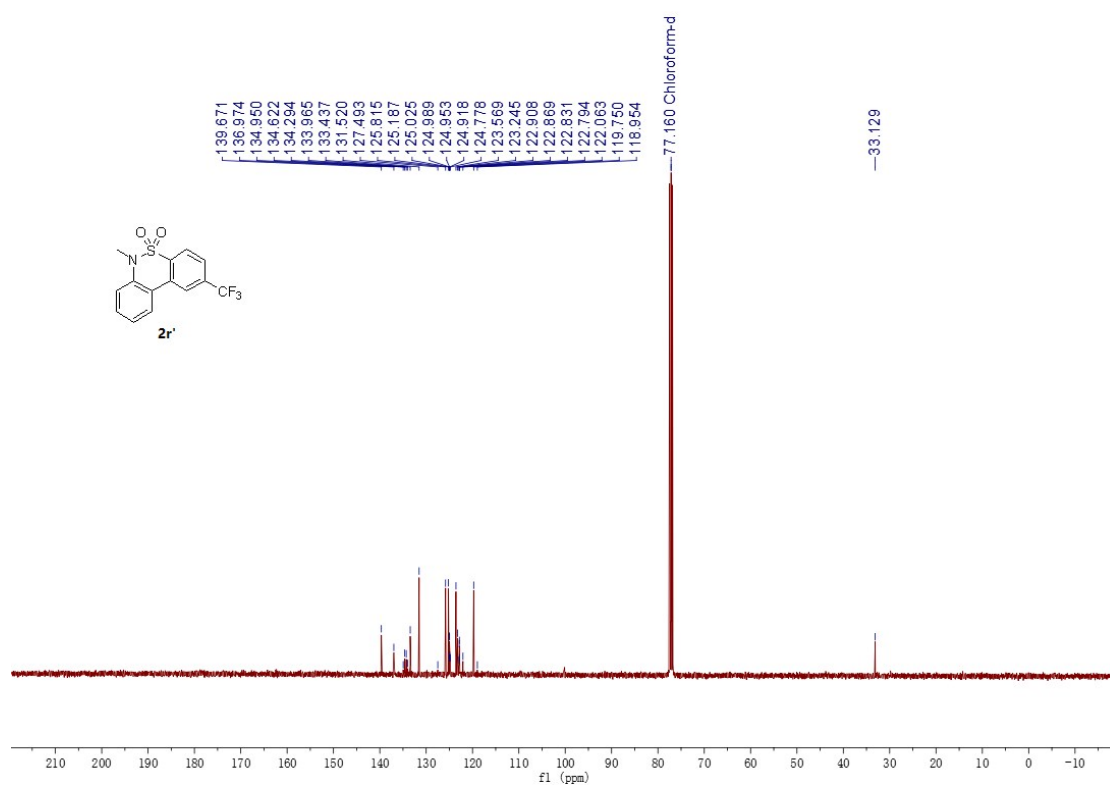

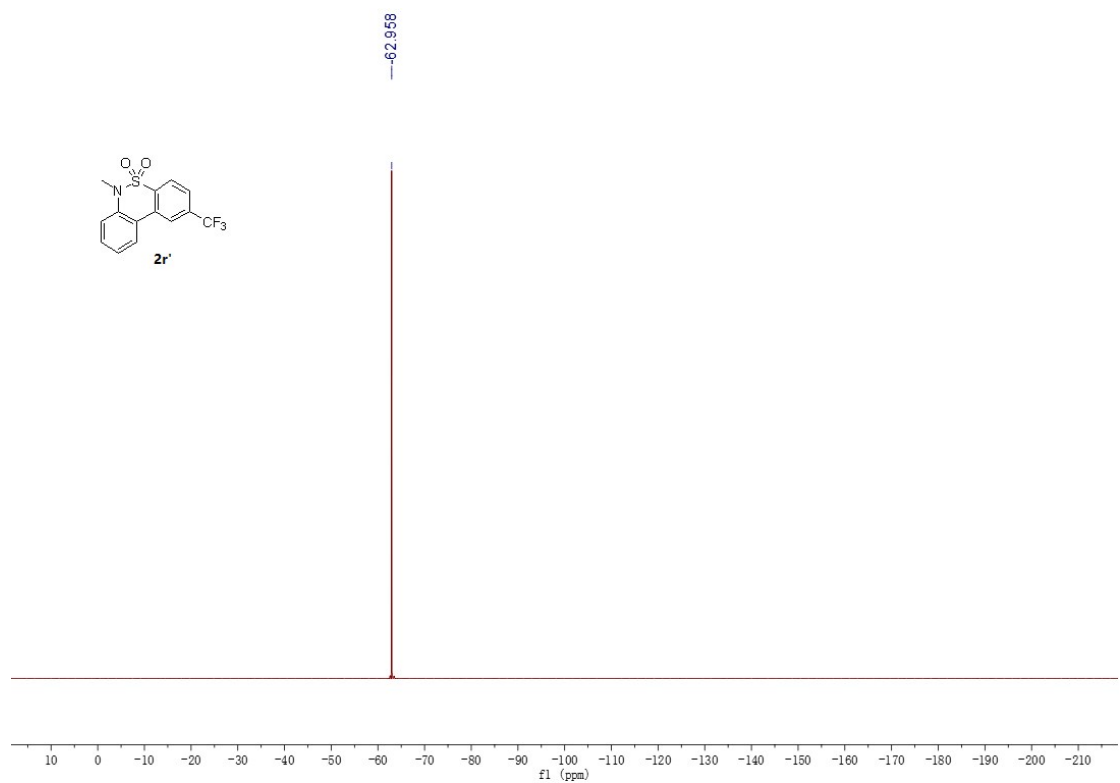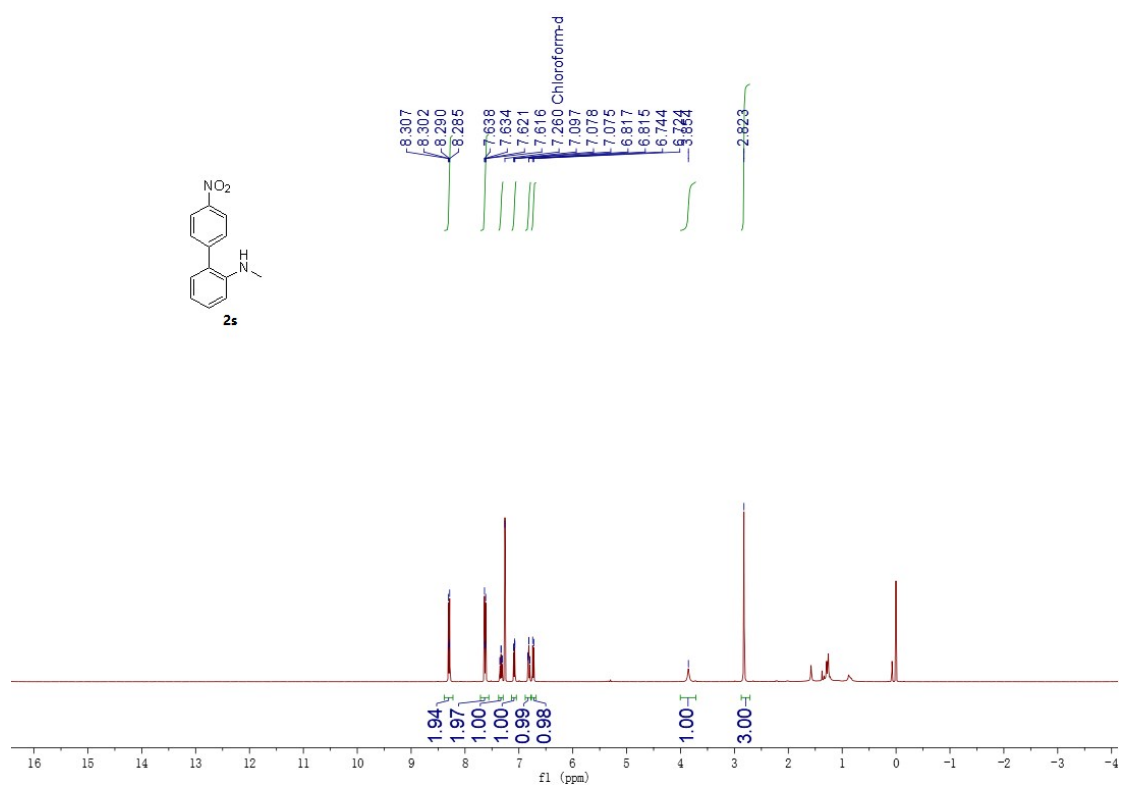

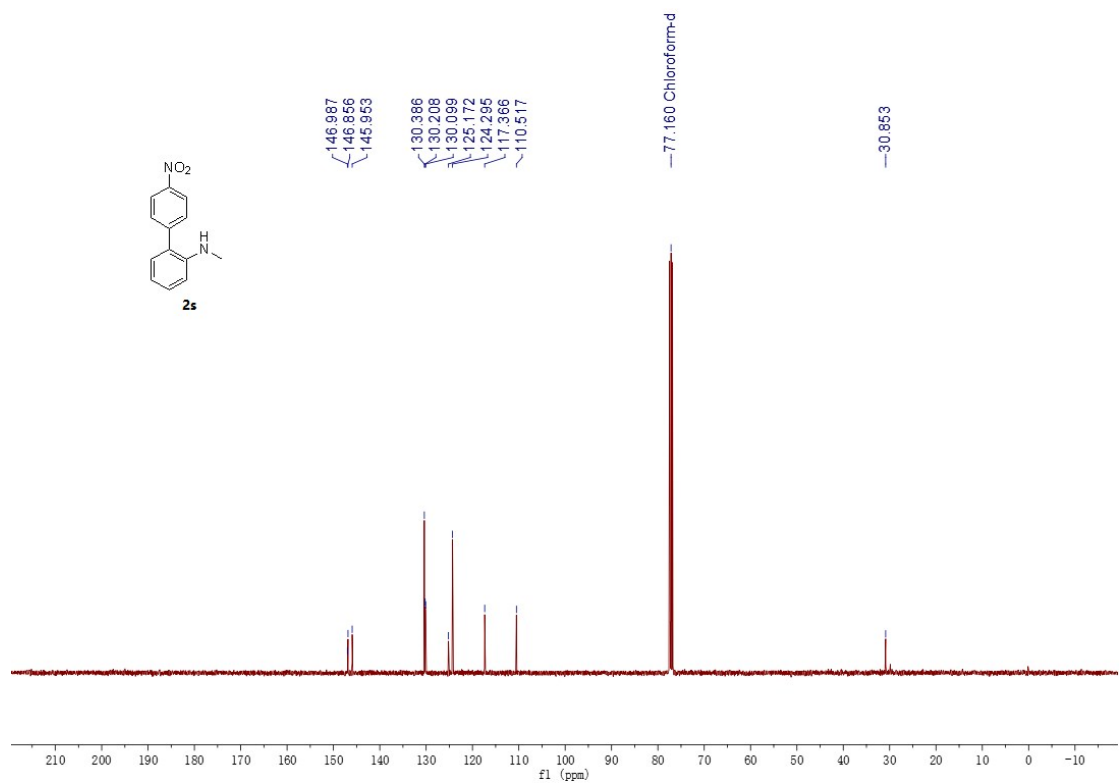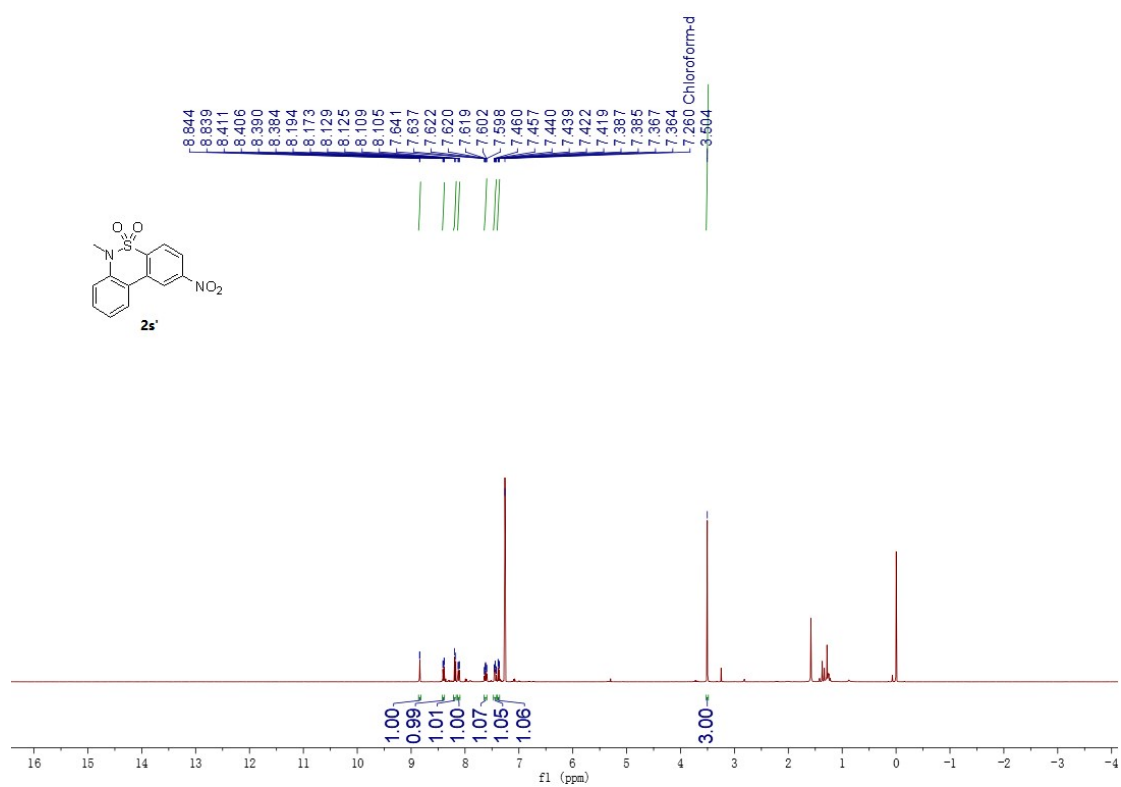

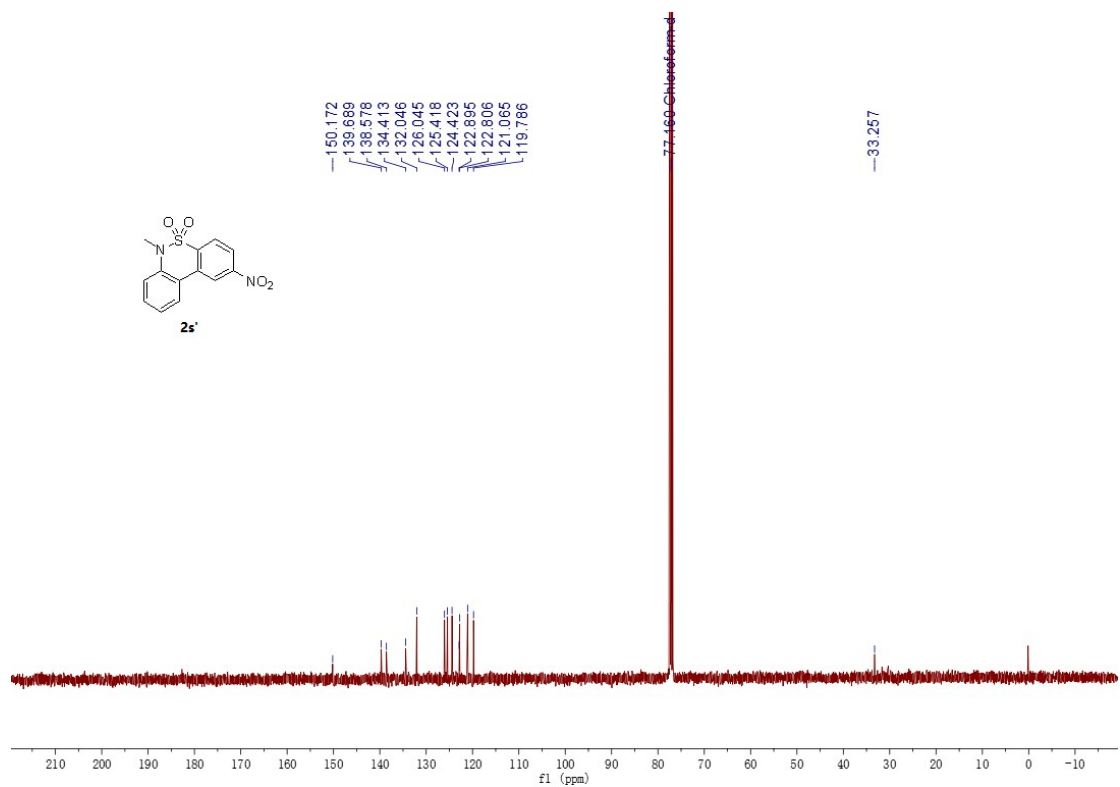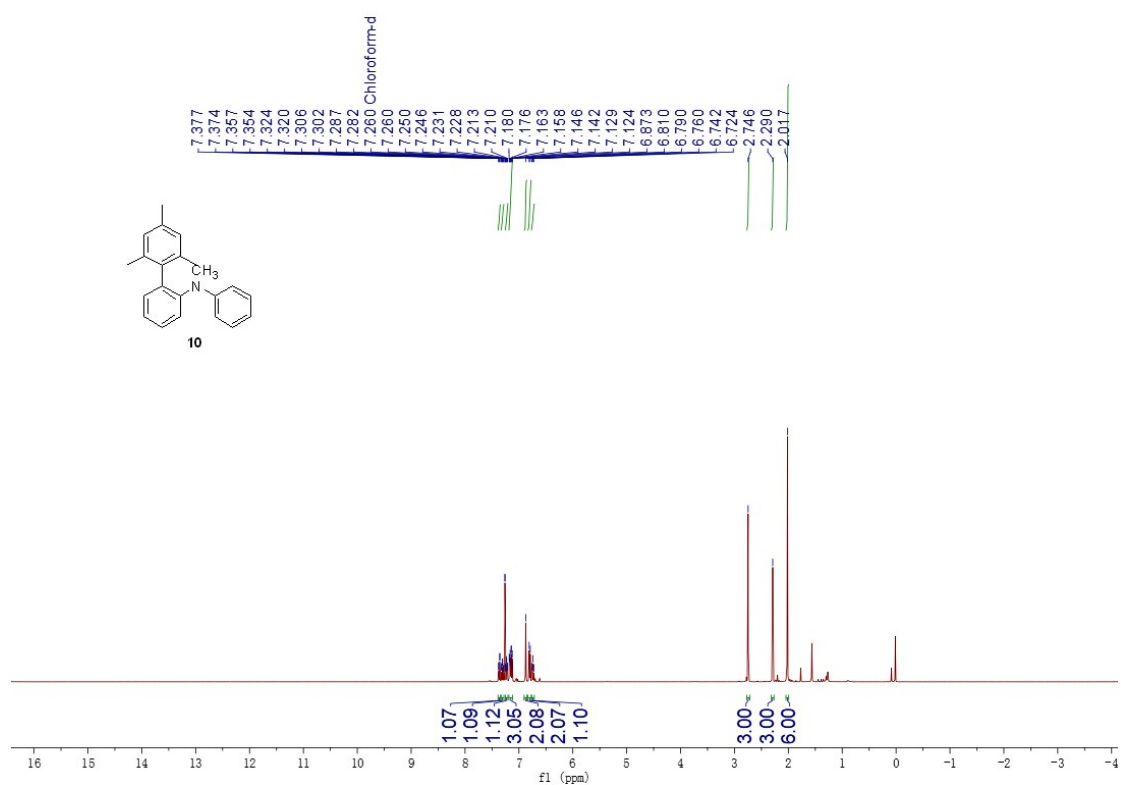

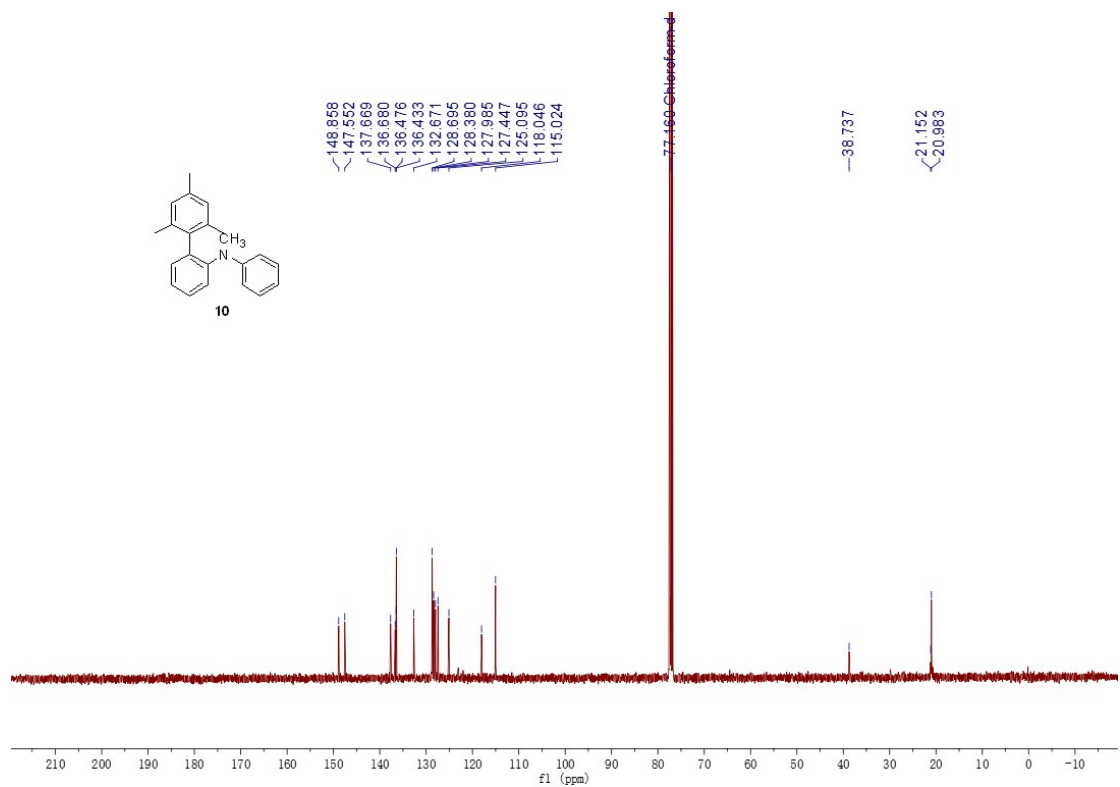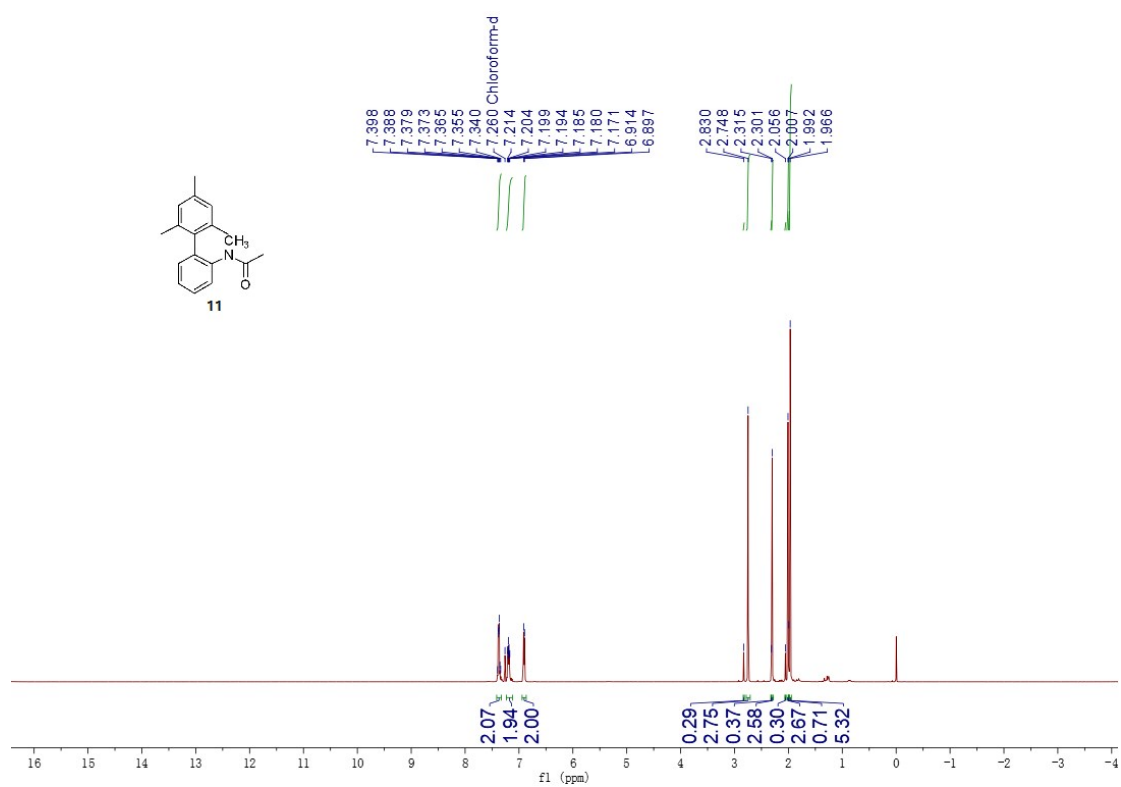

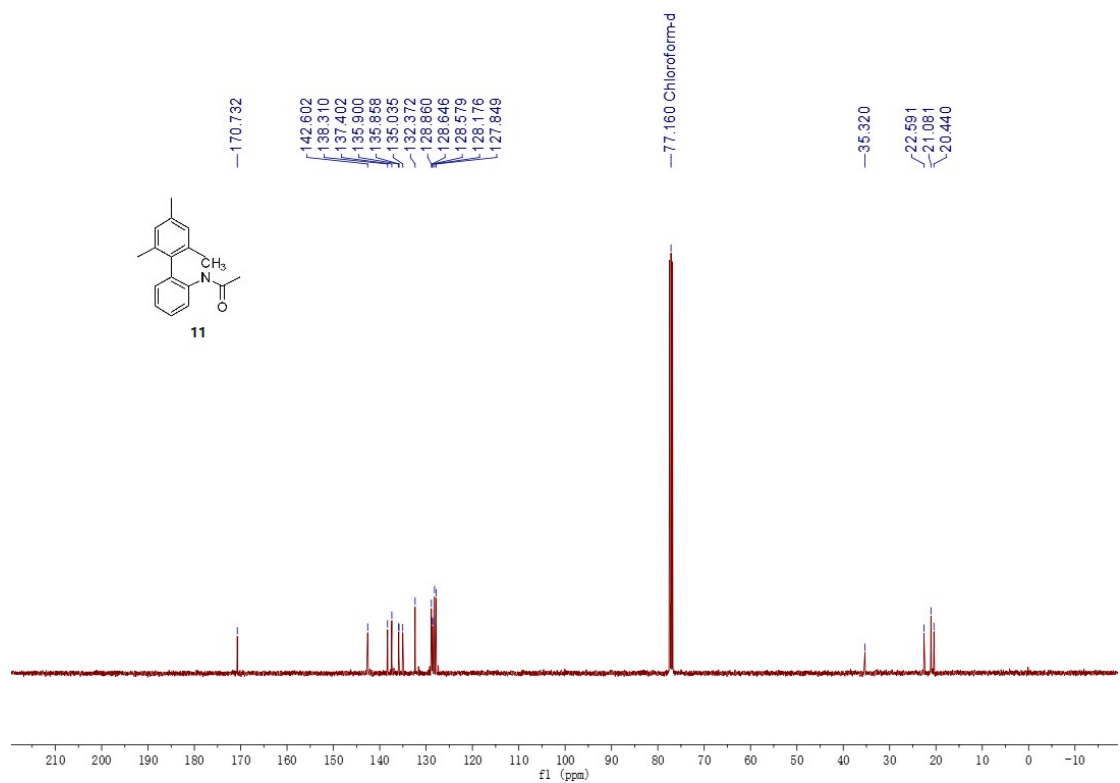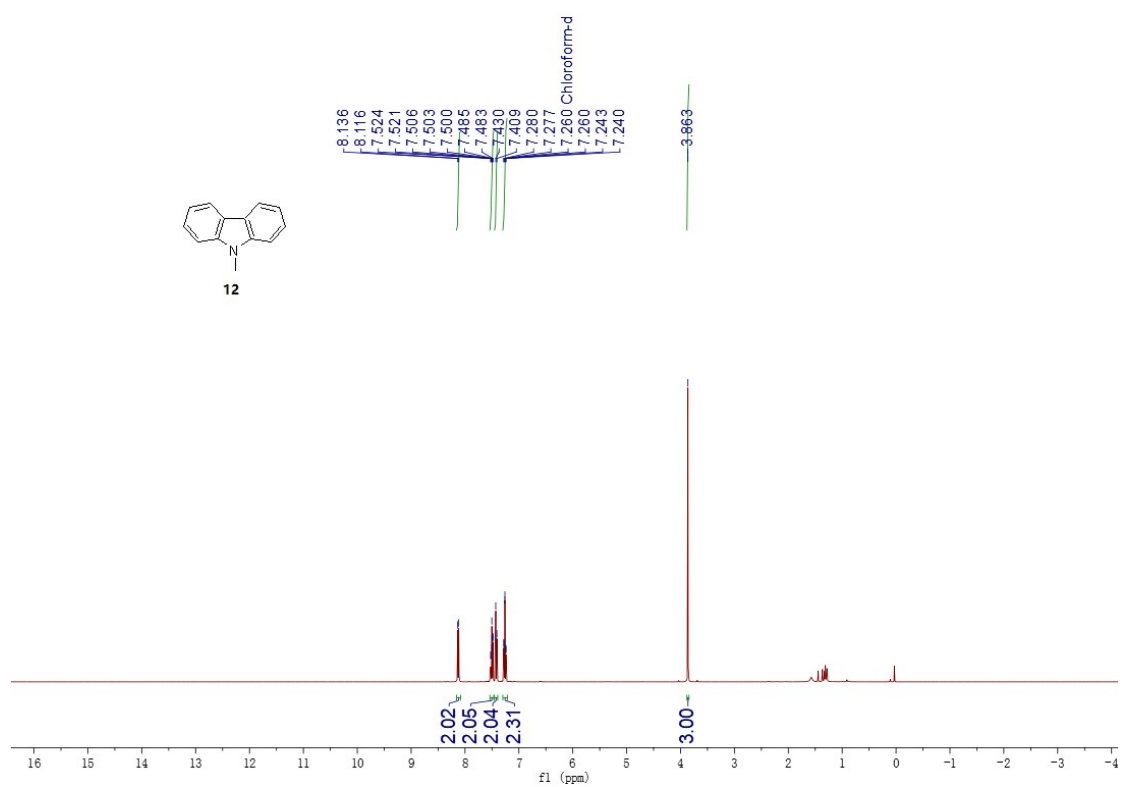

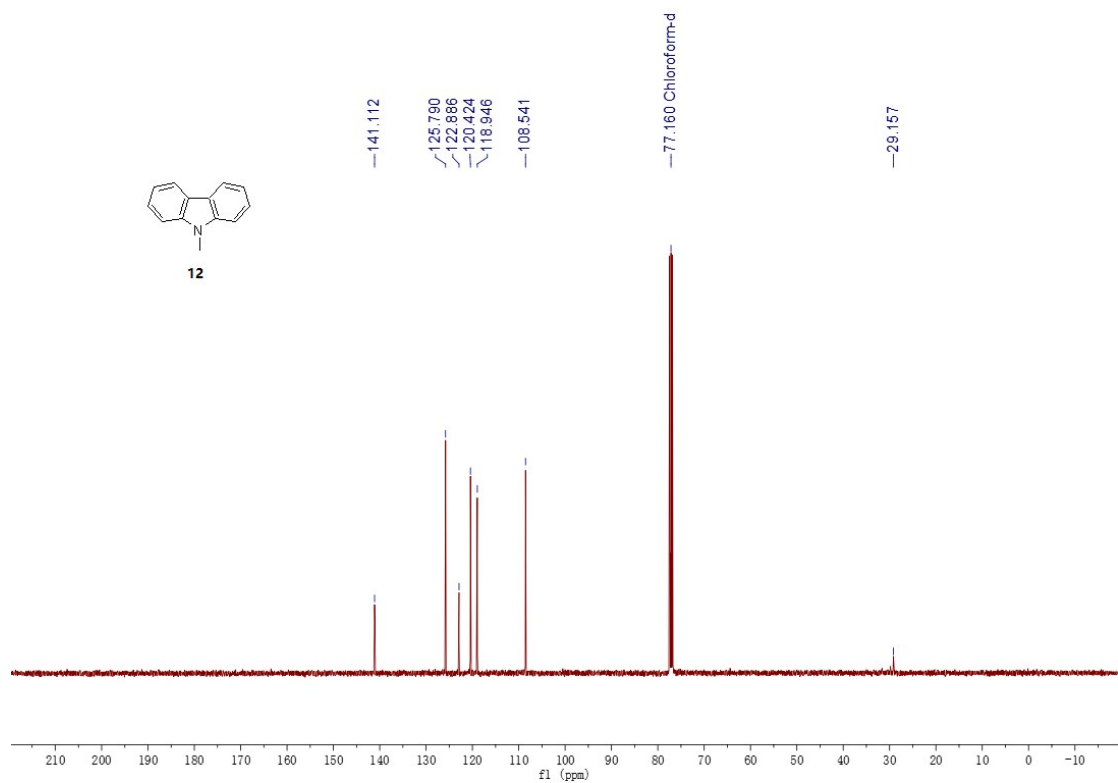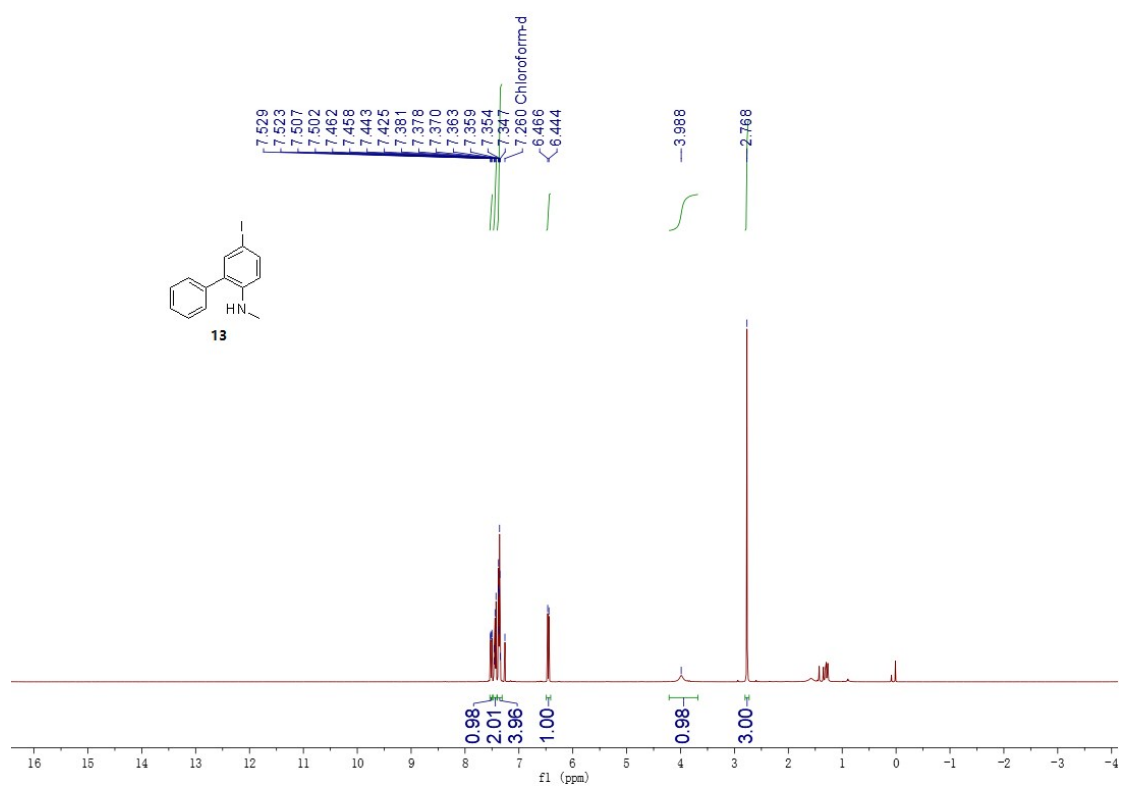

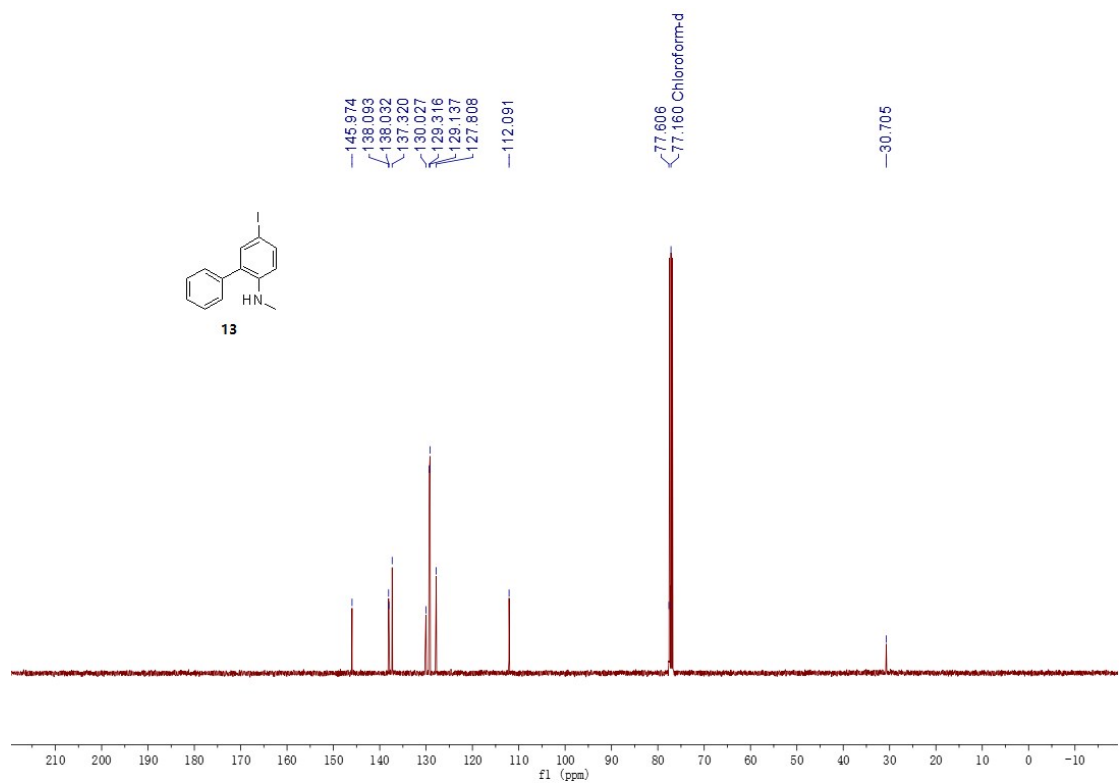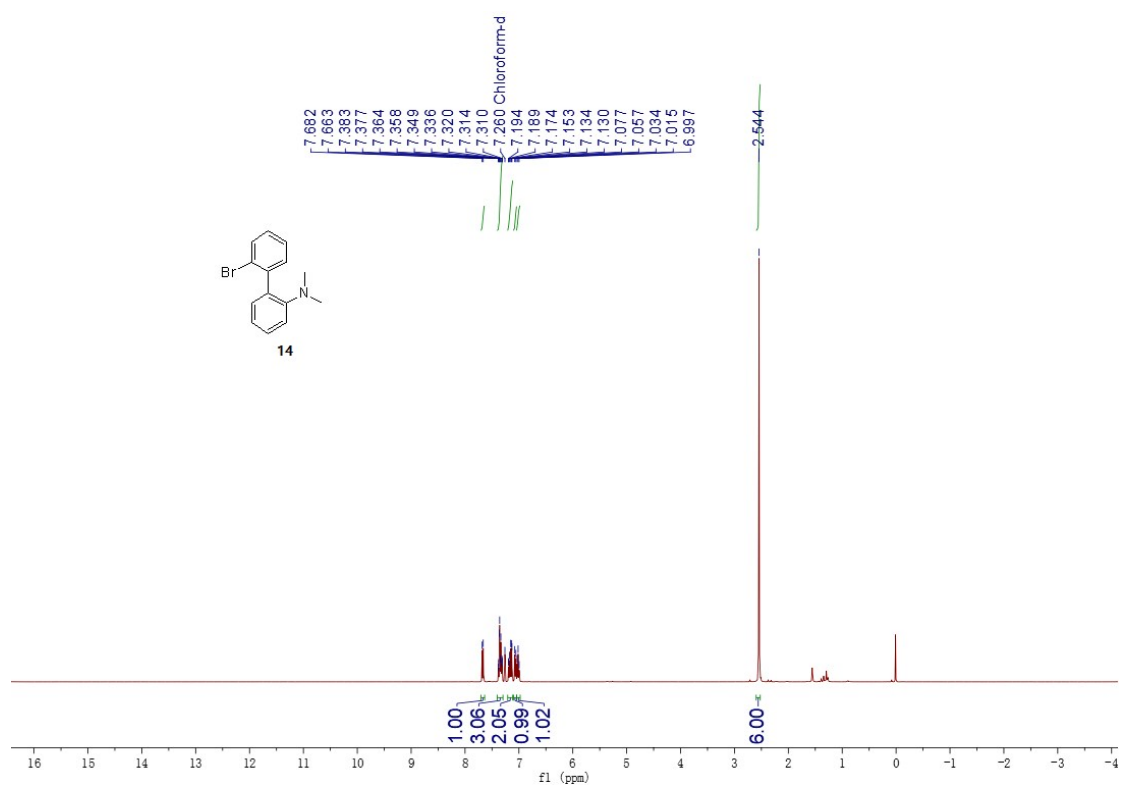

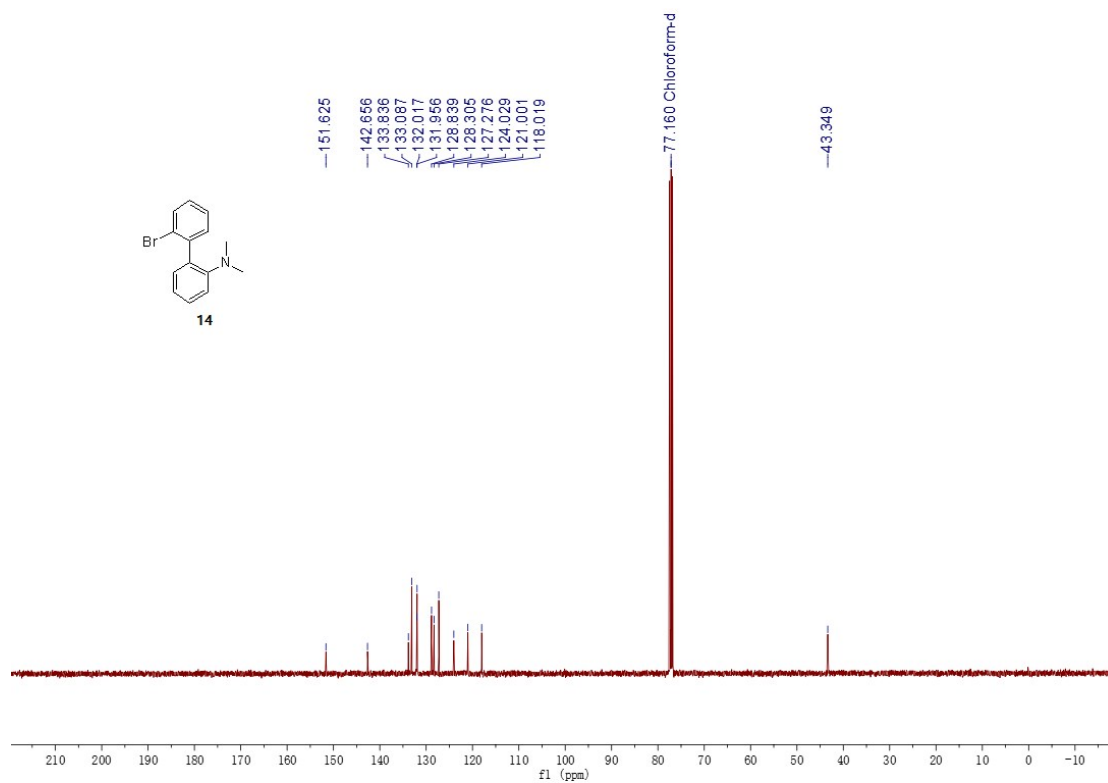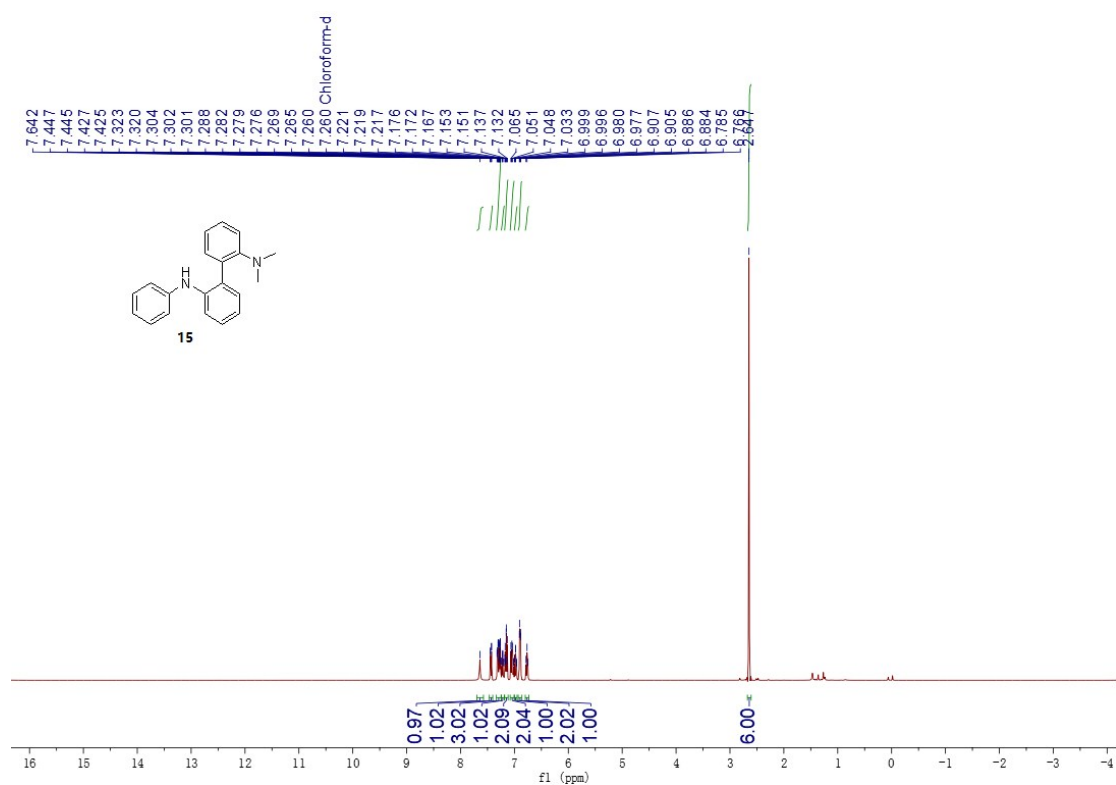

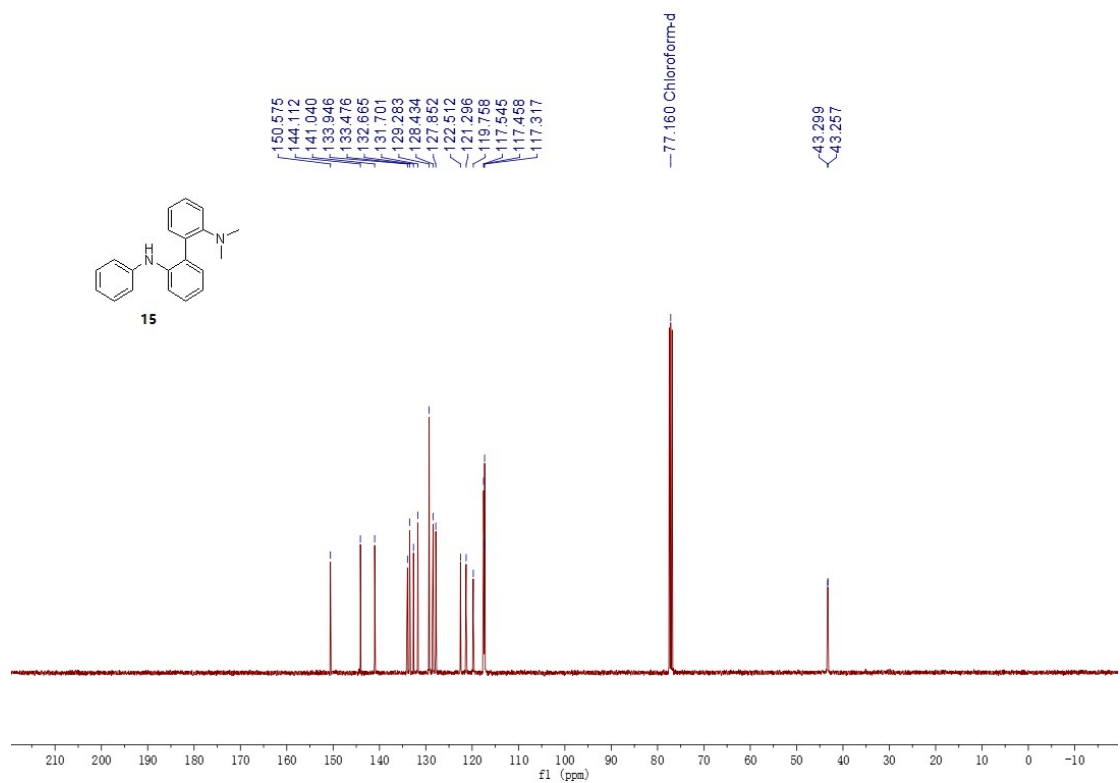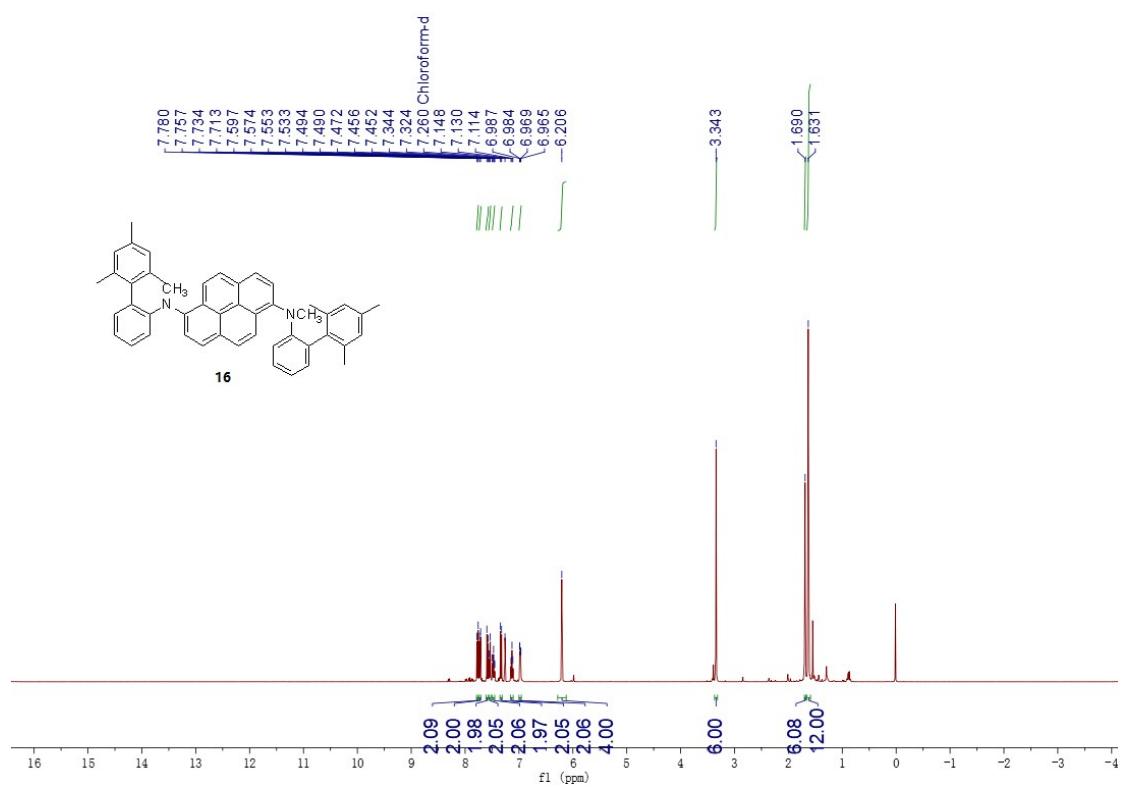

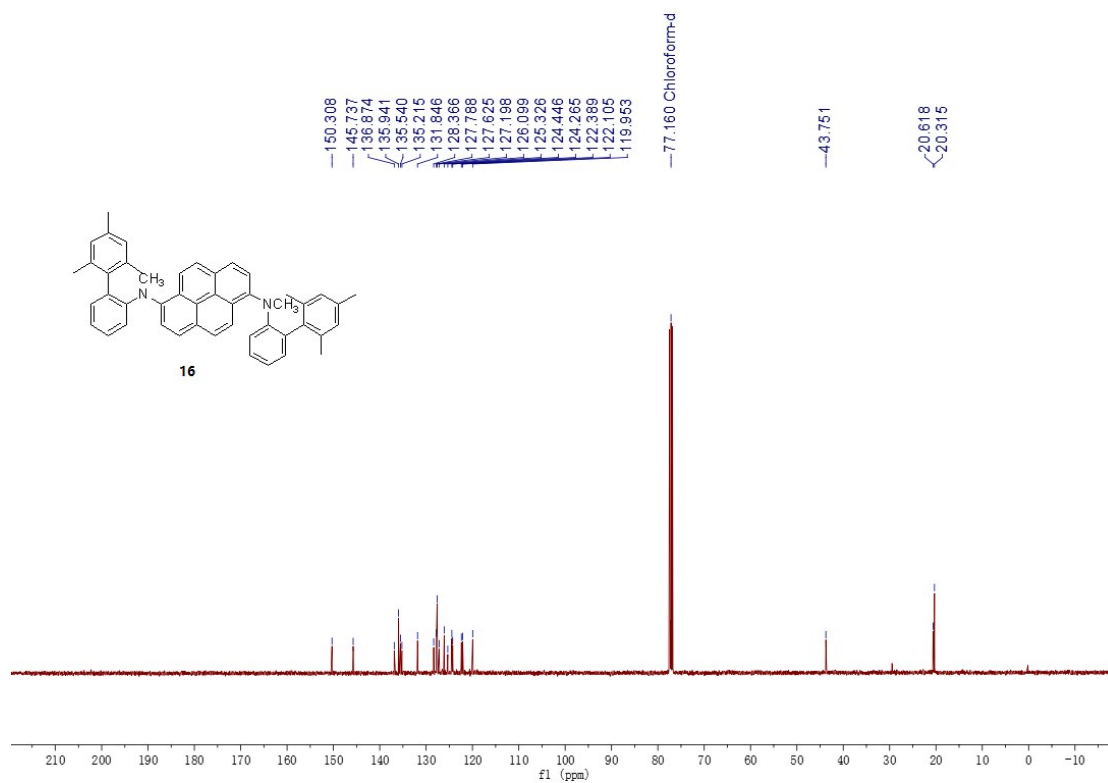

Supplement: d0cc01766c1.pdf [file d0cc01766c1.pdf]
